# Supplementary material for: Discovery, synthesis, and cytotoxic evaluation of isoquinolinequinones produced by Streptomyces albidoflavus derived from lichen
Source: Royal Society of Chemistry journal article supplement (doi:10.1039/d3ra07416a), 2023-01-01
Supplement: d3ra07416a1.pdf [file d3ra07416a1.pdf]

**Discovery, synthesis, and cytotoxic evaluation of  
isoquinolinequinones produced by *Streptomyces albidoflavus*  
derived from Lichen**

Ying Jin<sup>a</sup>, Zixuan Wang<sup>a</sup>, Nuerbiye Aobulikasimu<sup>a</sup>, Yixuan Hu<sup>a</sup>, Zengguang Zhang<sup>a</sup>,  
Hang Lv<sup>a</sup>, Mu Yu<sup>\*a</sup>, Yi Jiang<sup>\*c</sup>, Li Han<sup>a,b</sup>, Xueshi Huang<sup>\*a,b</sup>

<sup>a</sup>*Institute of Microbial Pharmaceuticals, College of Life and Health Sciences, Northeastern University, Shenyang 110819, China*

<sup>b</sup>*Key Laboratory of Bioresource Research and Development of Liaoning Province, College of Life and Health Sciences, Northeastern University, Shenyang 110819, China*

<sup>c</sup>*Yunnan Institute of Microbiology, Yunnan University, Kunming 650091, China*

\*Corresponding authors

E-mail: jiangyi@ynu.edu.cn (Y. Jiang); E-mail: Muyu@mail.neu.edu.cn (Y. Mu); E-mail:  
huangxs@mail.neu.edu.cn (X. Huang)

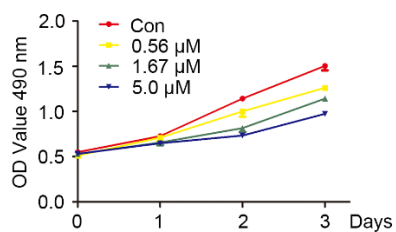

**Figure S1.** Compound **1g** retarded the growth and proliferation of MBA-MB-231 cells. The growth curve of MBA-MB-231 cells treated with vehicle (con group) and various concentrations (0.56, 1.67 and 5.0  $\mu$ M) of **1g** for 3 days was detected by MTT assay.

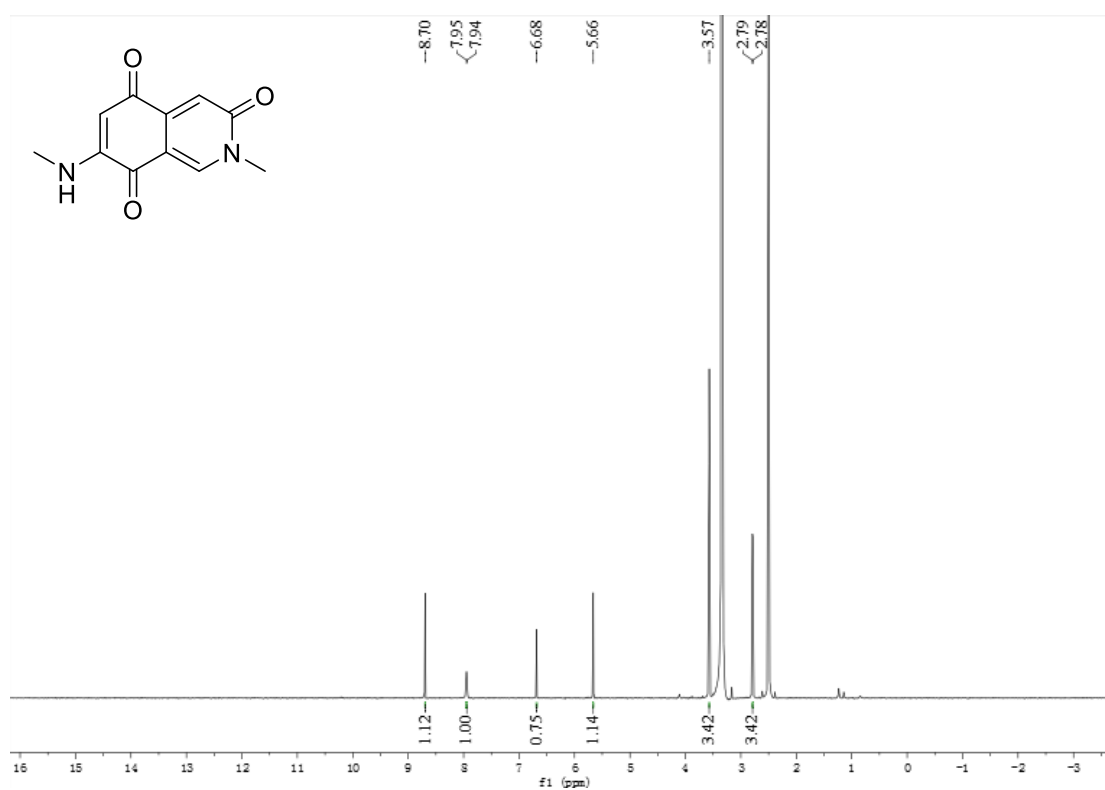

**Figure S2.** The <sup>1</sup>H-NMR (600MHz, DMSO-d<sub>6</sub>) spectrum of compound **1**

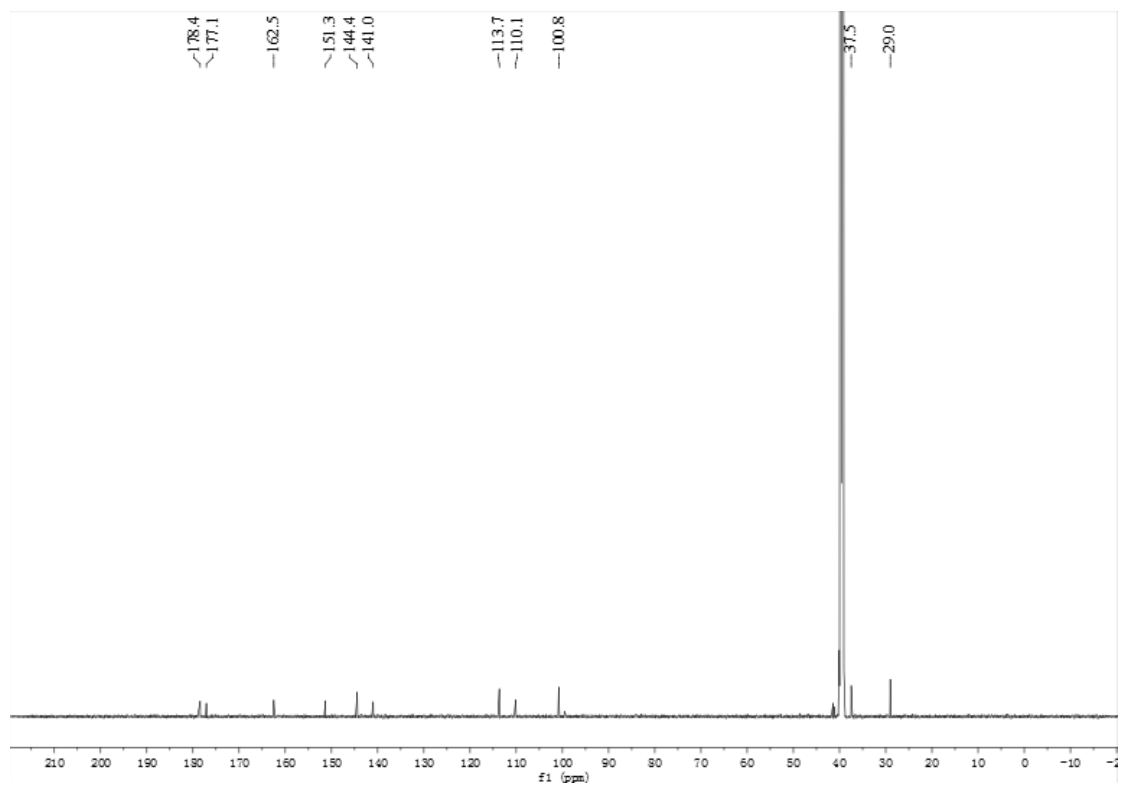

**Figure S3.** The  $^{13}\text{C}$ -NMR (150MHz, DMSO-d<sub>6</sub>) spectrum of compound **1**

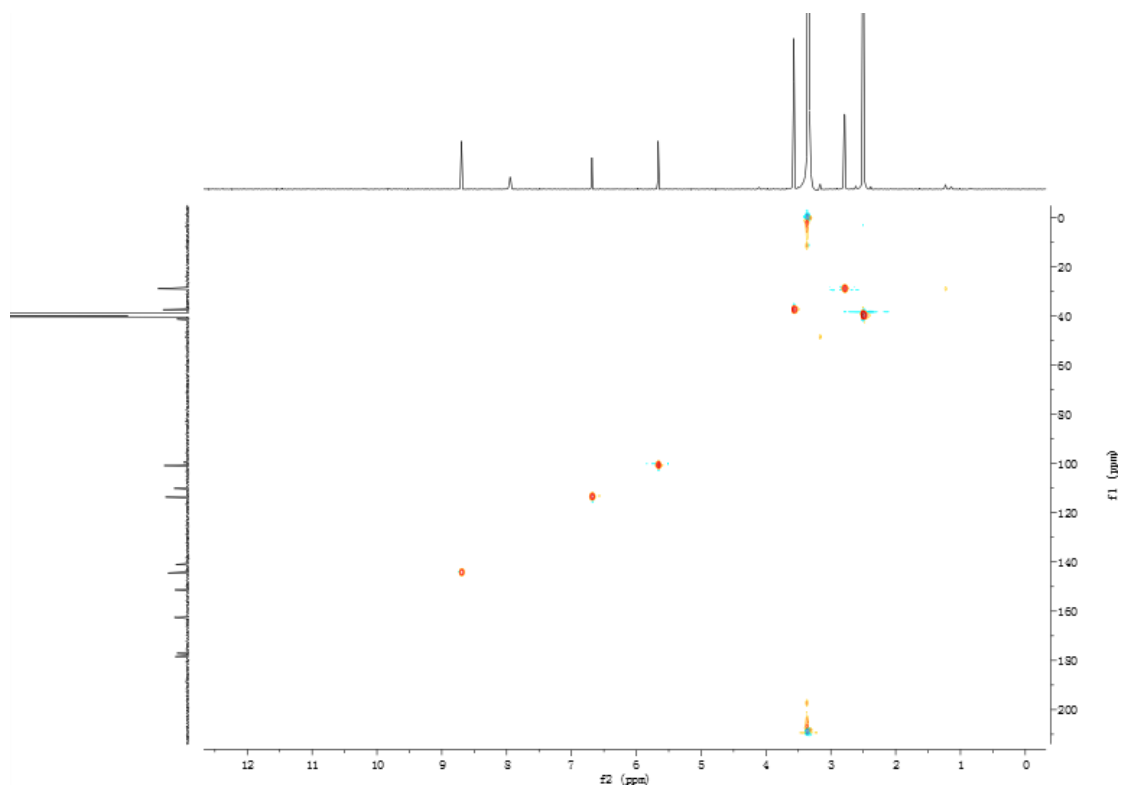

**Figure S4.** The HSQC spectrum of compound **1**

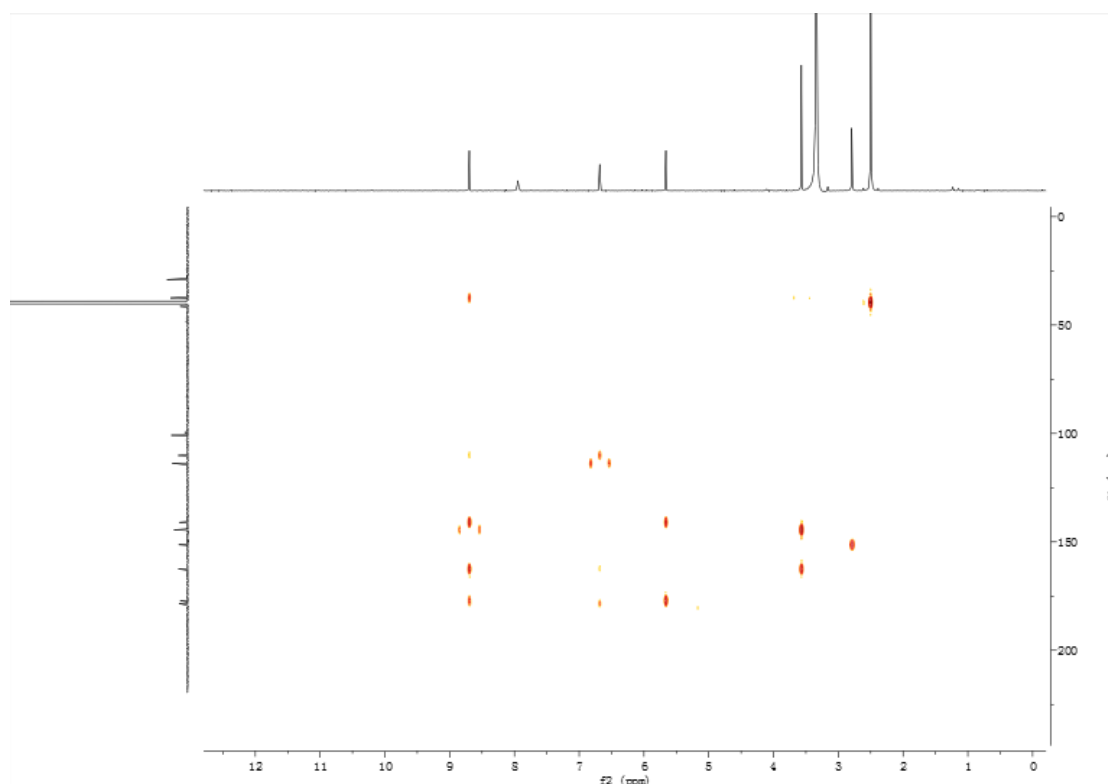

**Figure S5.** The HMBC spectrum of compound **1**

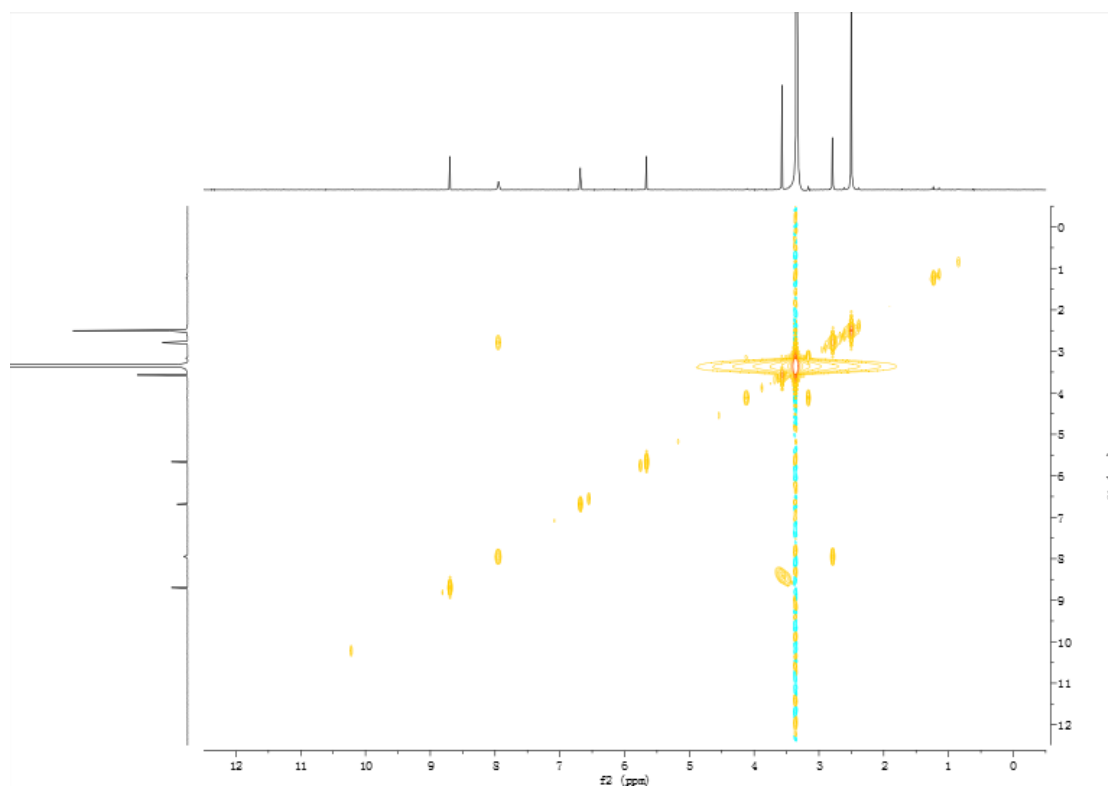

**Figure S6.** The COSY spectrum of compound **1**

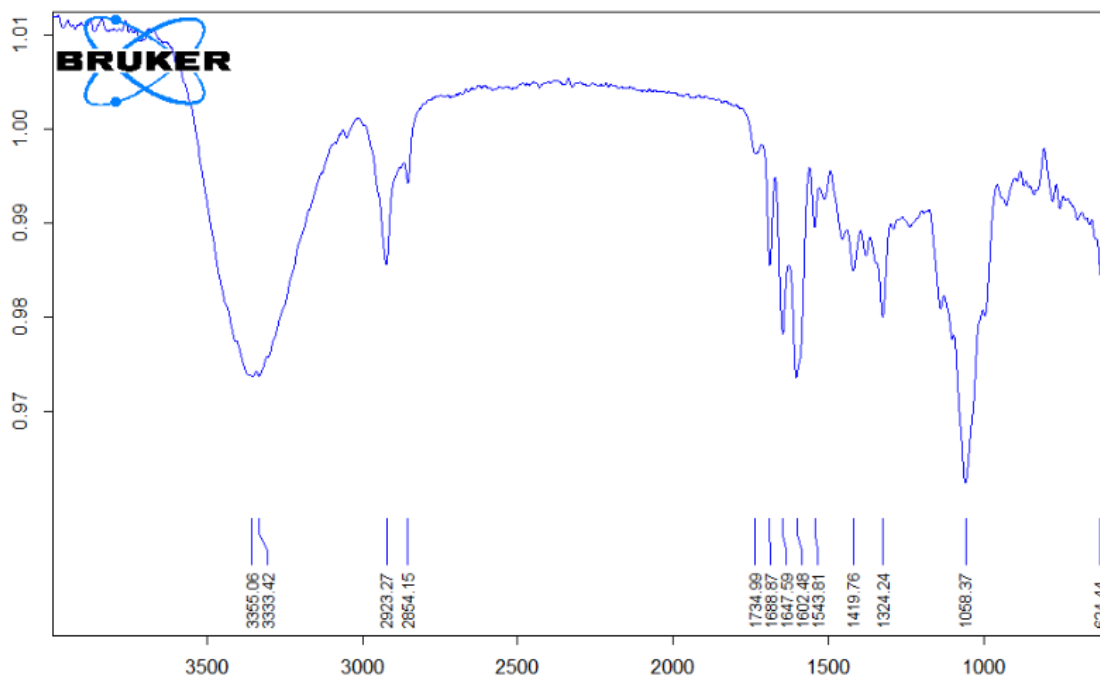

**Figure S7.** The IR spectrum of compound **1**

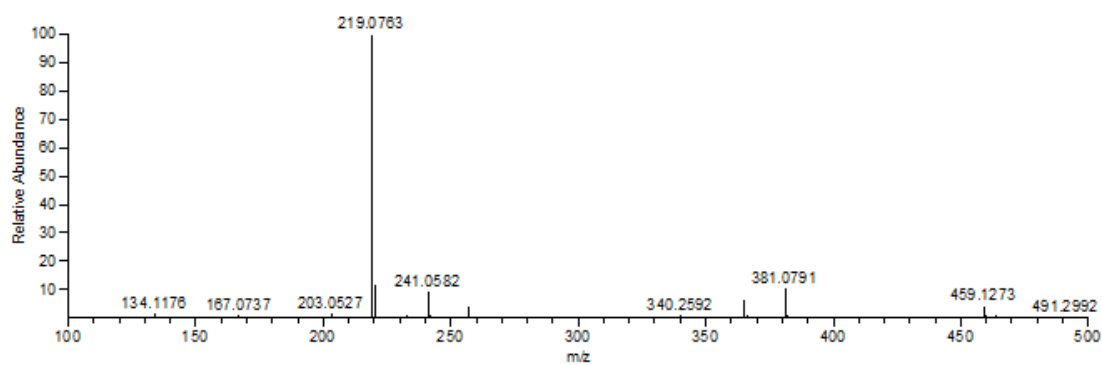

**Figure S8.** The HRESIMS of compound **1**

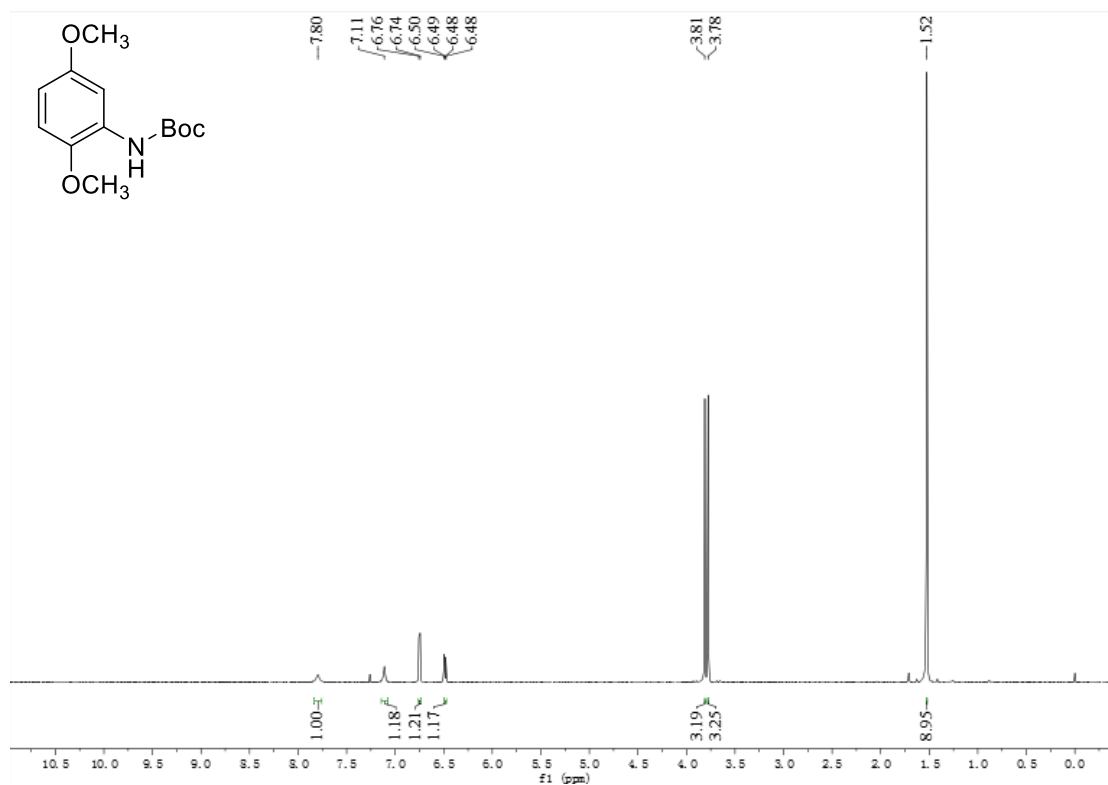

**Figure S9.** The <sup>1</sup>H-NMR (600MHz, CDCl<sub>3</sub>) spectrum of compound 7

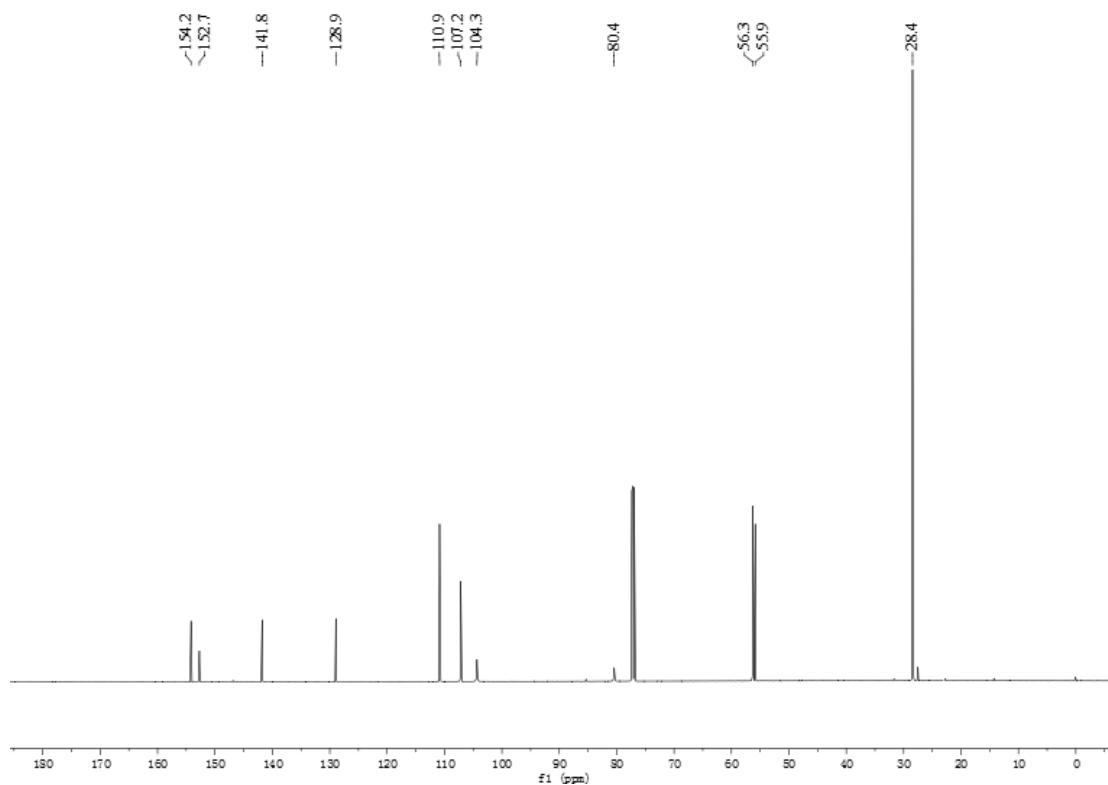

**Figure S10.** The <sup>13</sup>C-NMR (150MHz, CDCl<sub>3</sub>) spectrum of compound 7

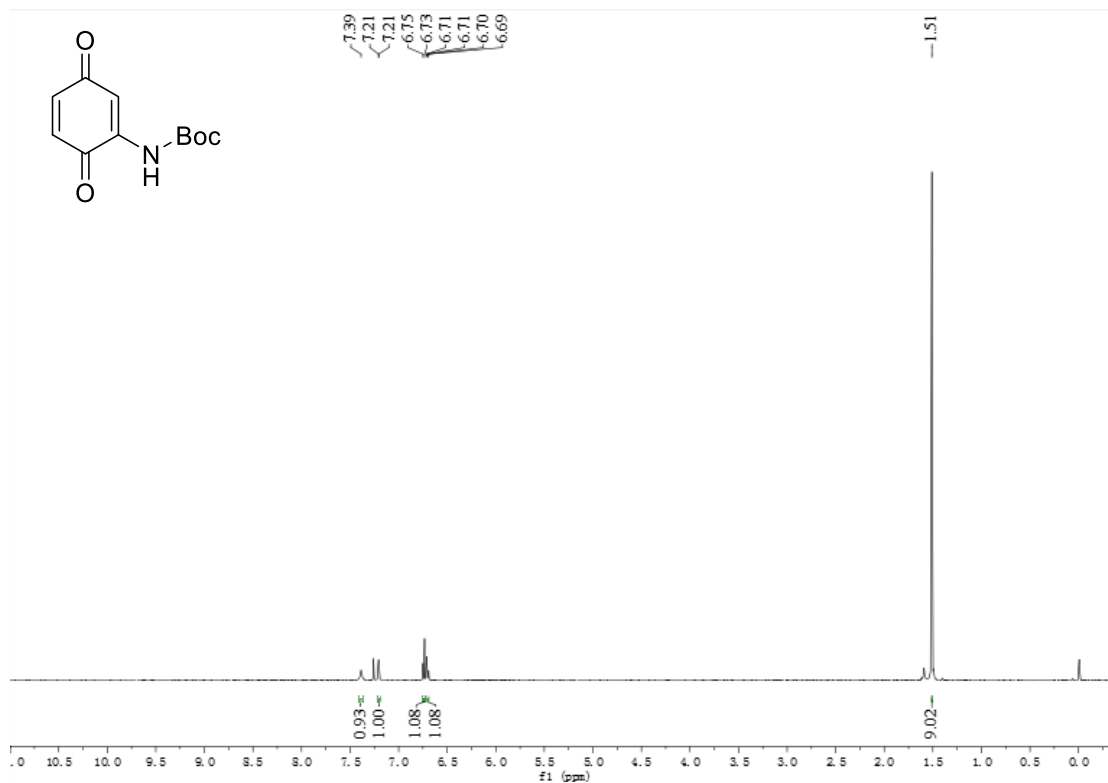

**Figure S11.** The <sup>1</sup>H-NMR (600MHz, CDCl<sub>3</sub>) spectrum of compound **6**

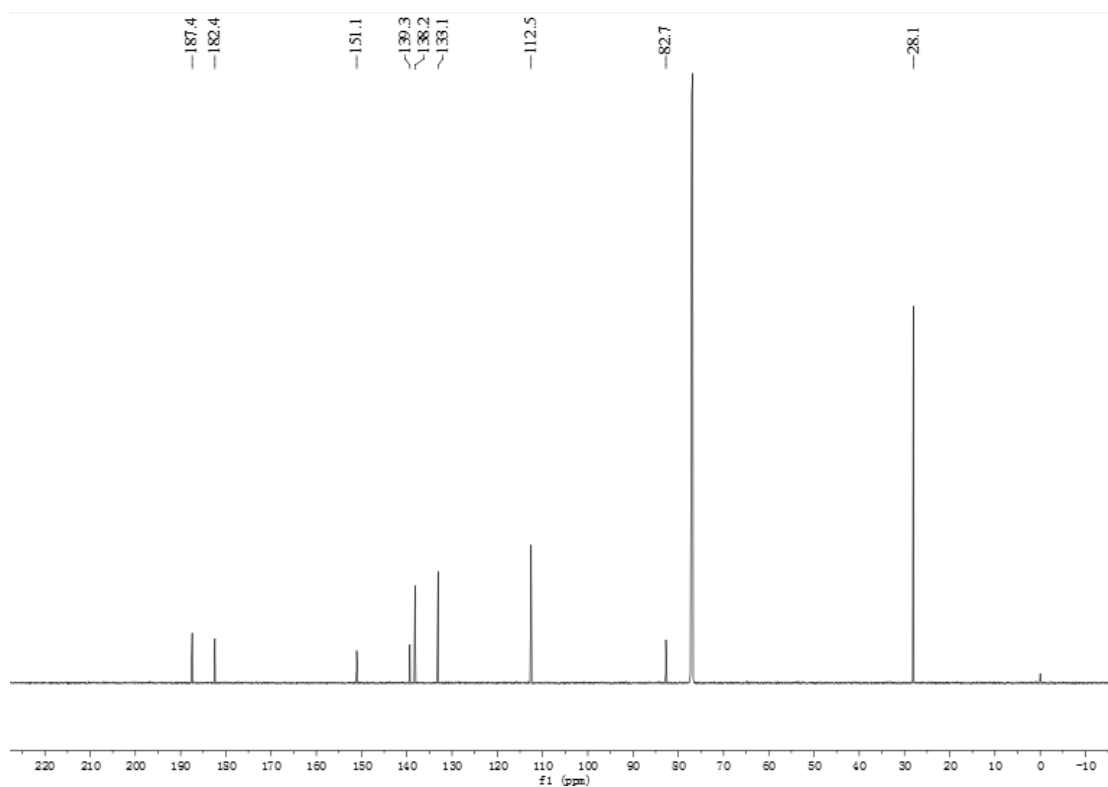

**Figure S12.** The <sup>13</sup>C-NMR (150MHz, CDCl<sub>3</sub>) spectrum of compound **6**

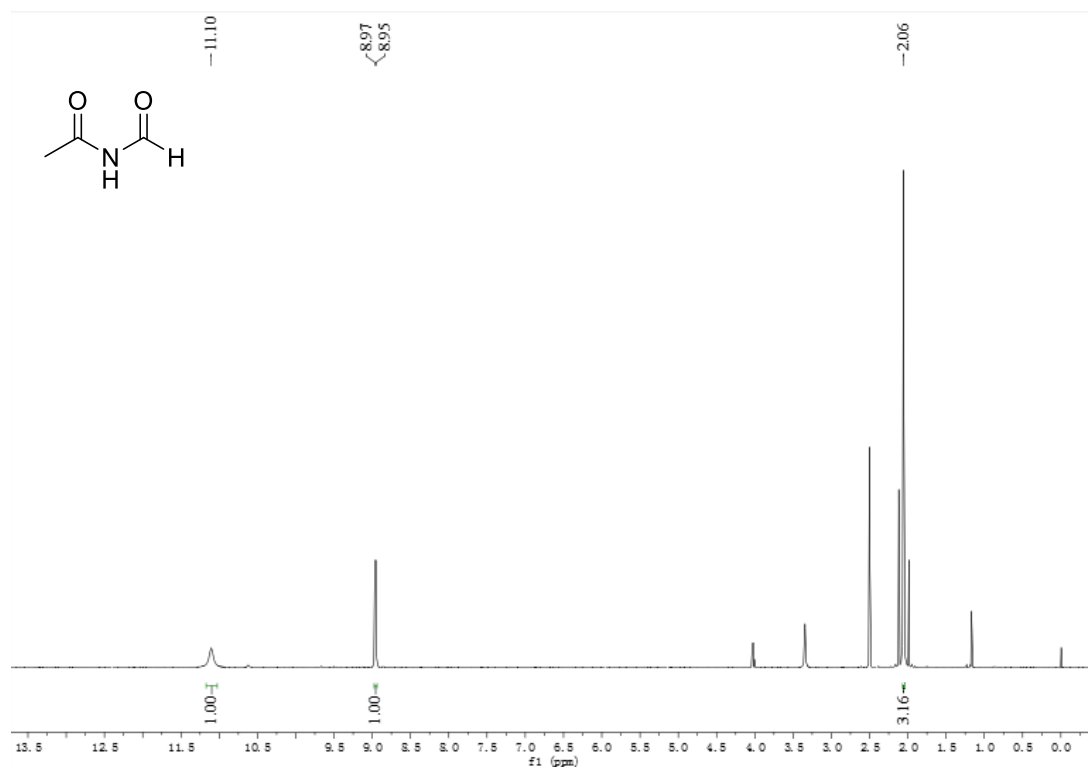

**Figure S13.** The <sup>1</sup>H-NMR (600MHz, DMSO-*d*<sub>6</sub>) spectrum of compound **9**

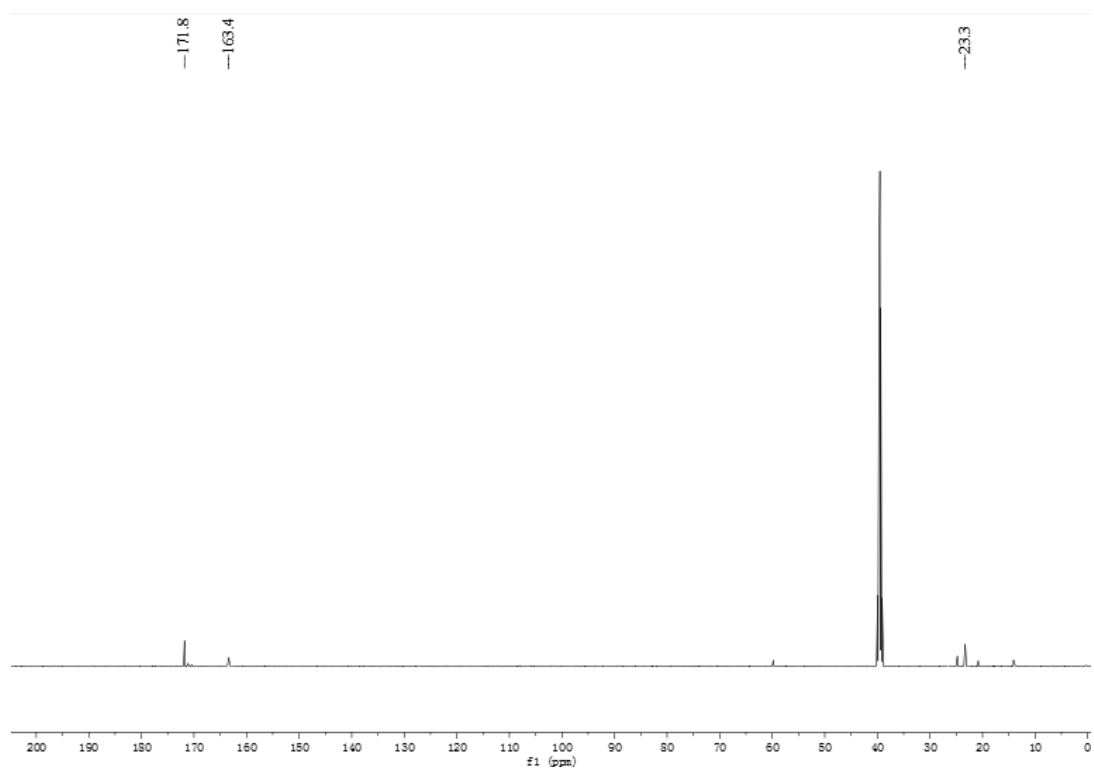

**Figure S14.** The <sup>13</sup>C-NMR (150MHz, DMSO-*d*<sub>6</sub>) spectrum of compound **9**



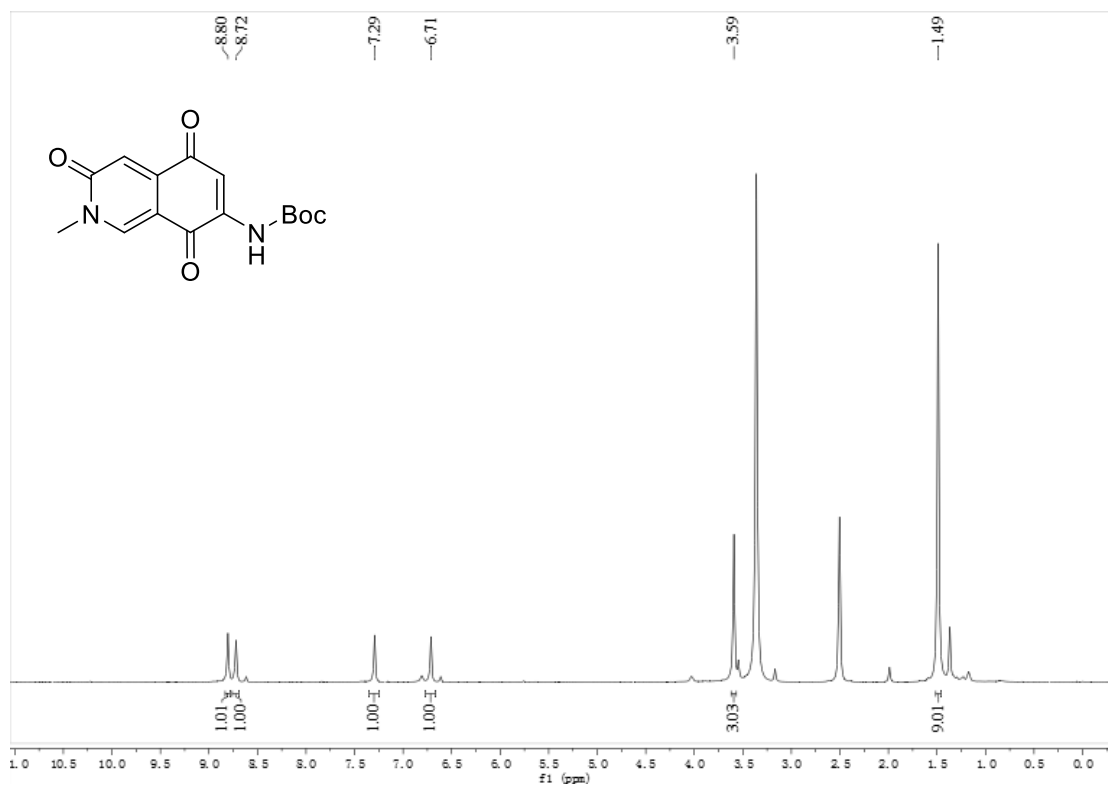

**Figure S15.** The <sup>1</sup>H-NMR (600MHz, DMSO-*d*<sub>6</sub>) spectrum of compound **11**

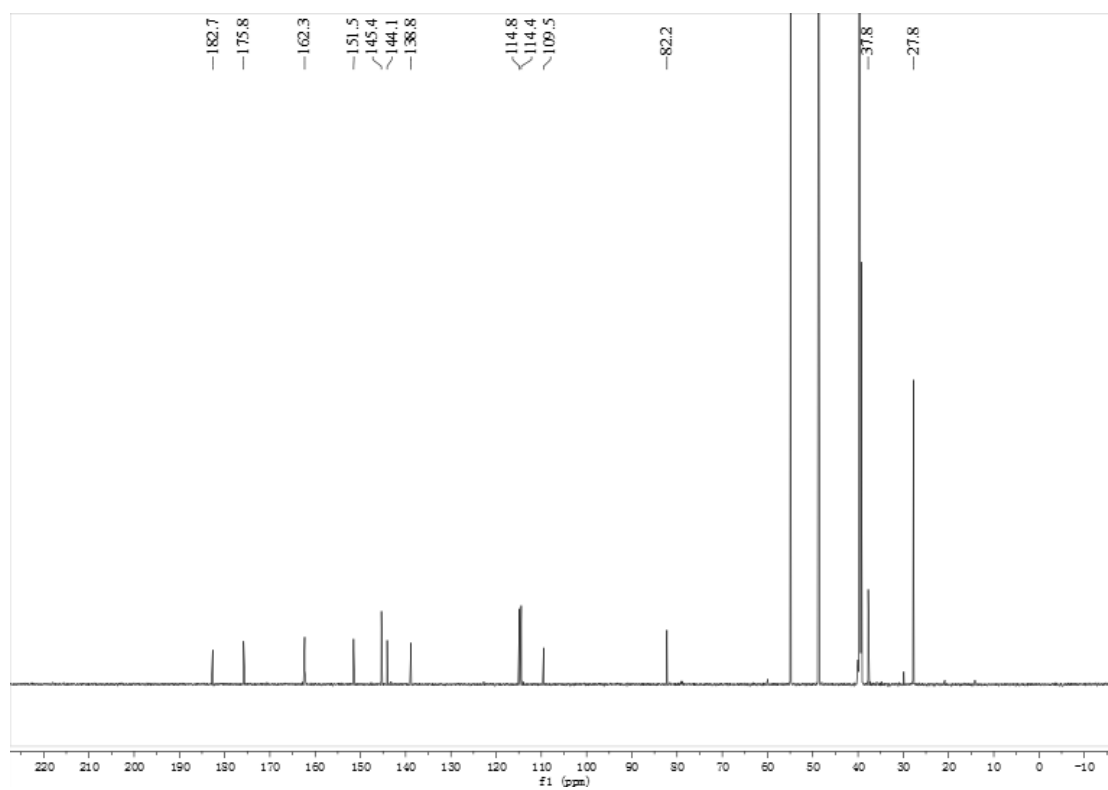

**Figure S16.** The <sup>13</sup>C-NMR (150MHz, DMSO-*d*<sub>6</sub>) spectrum of compound **11**

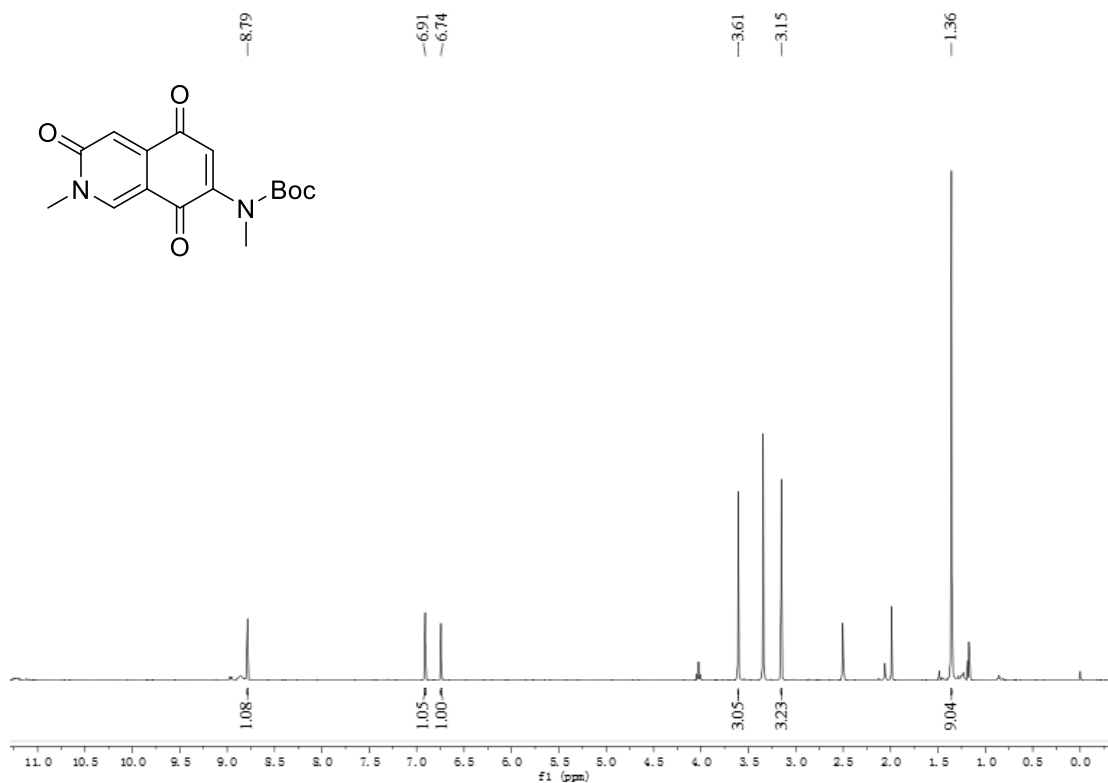

**Figure S17.** The  $^1\text{H-NMR}$  (600MHz,  $\text{DMSO-}d_6$ ) spectrum of compound **12**

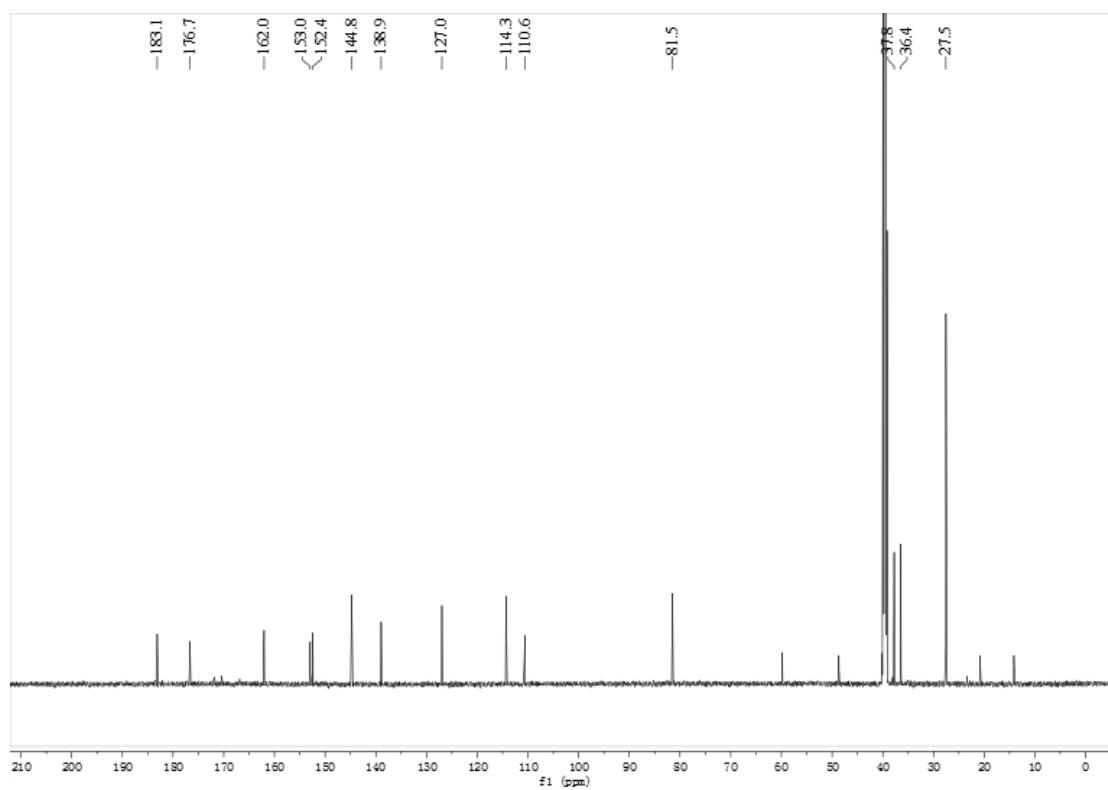

**Figure S18.** The  $^{13}\text{C-NMR}$  (150MHz,  $\text{DMSO-}d_6$ ) spectrum of compound **12**

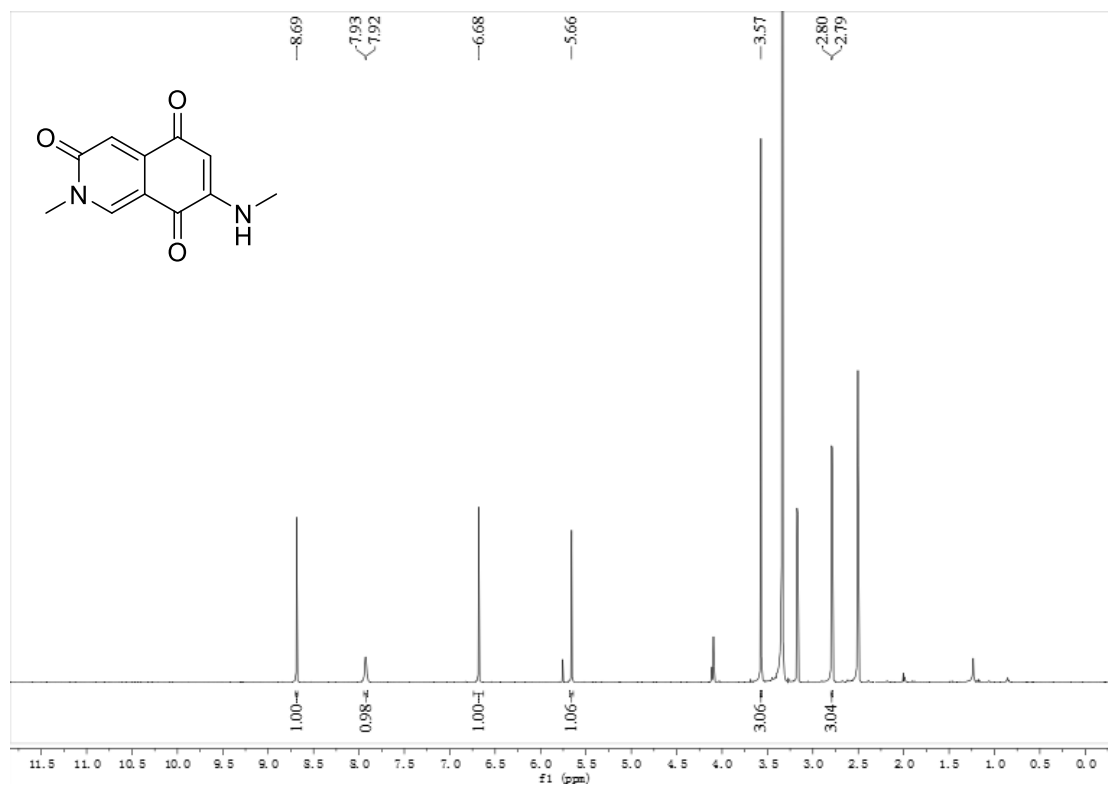

**Figure S19.** The  $^1\text{H-NMR}$  (600MHz,  $\text{DMSO-}d_6$ ) spectrum of synthesized compound **1**

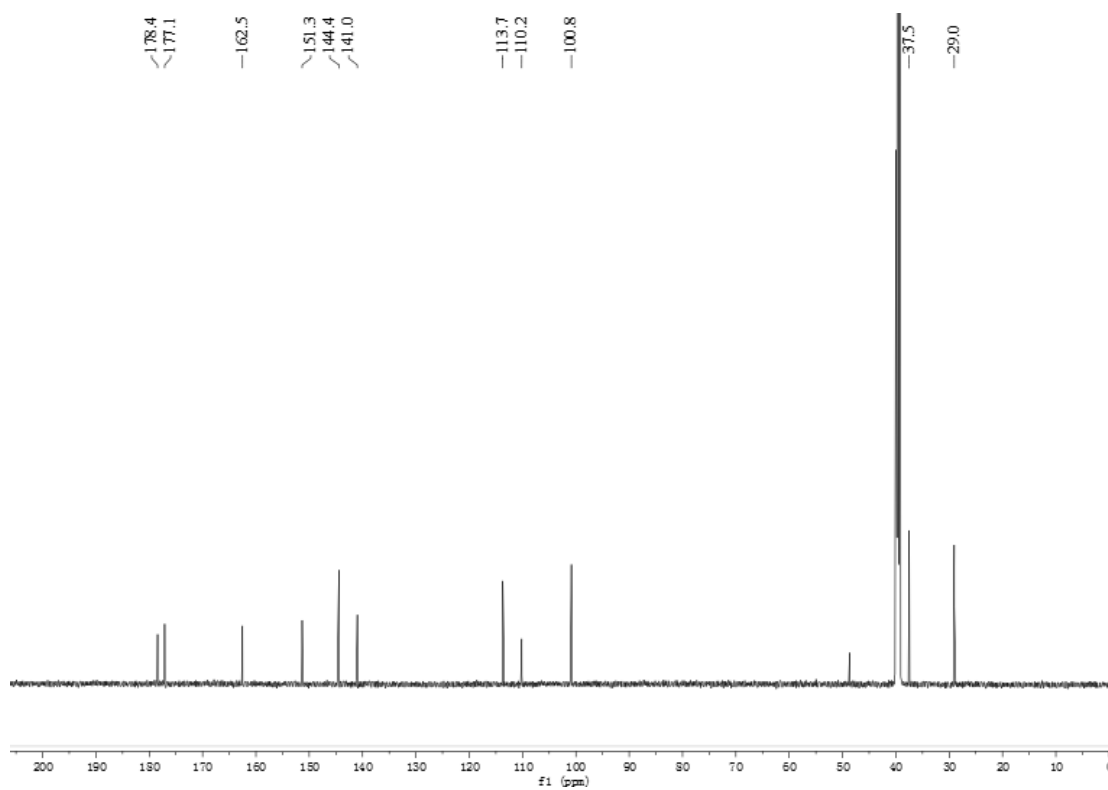

**Figure S20.** The  $^{13}\text{C-NMR}$  (150MHz,  $\text{DMSO-}d_6$ ) spectrum of synthesized compound **1**

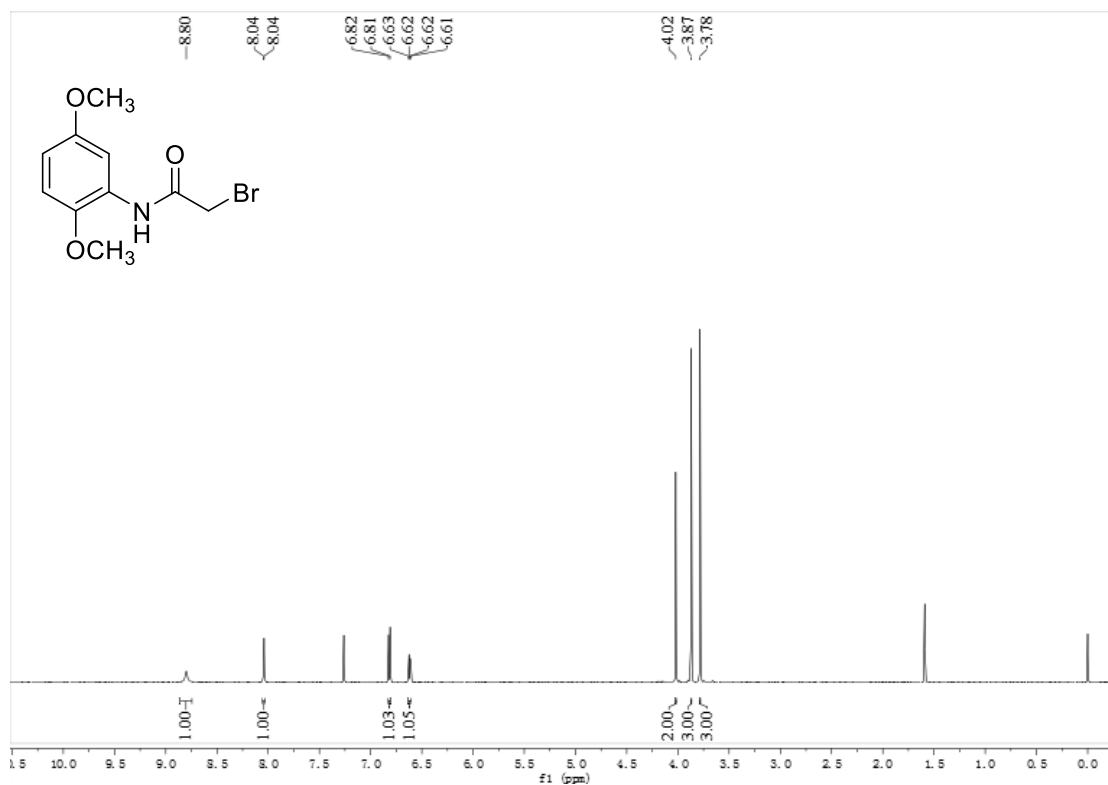

**Figure S21.** The <sup>1</sup>H-NMR (600MHz, CDCl<sub>3</sub>) spectrum of compound **13**

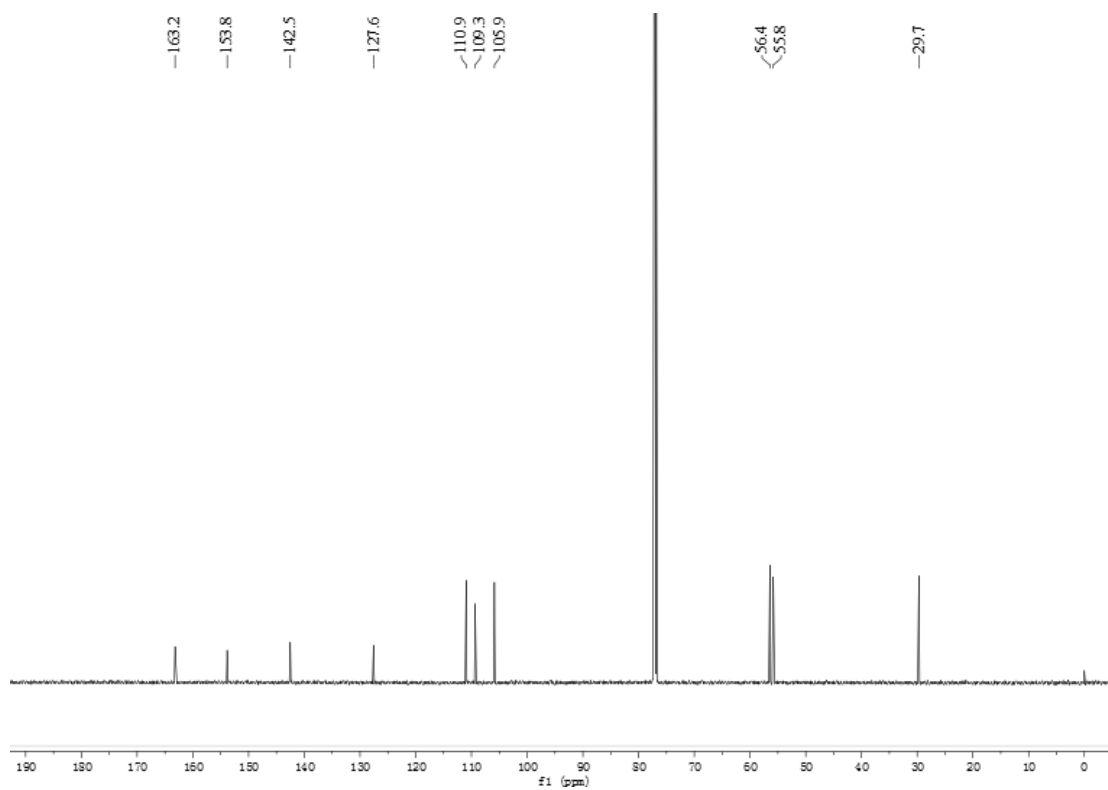

**Figure S22.** The <sup>13</sup>C-NMR (150MHz, CDCl<sub>3</sub>) spectrum of compound **13**

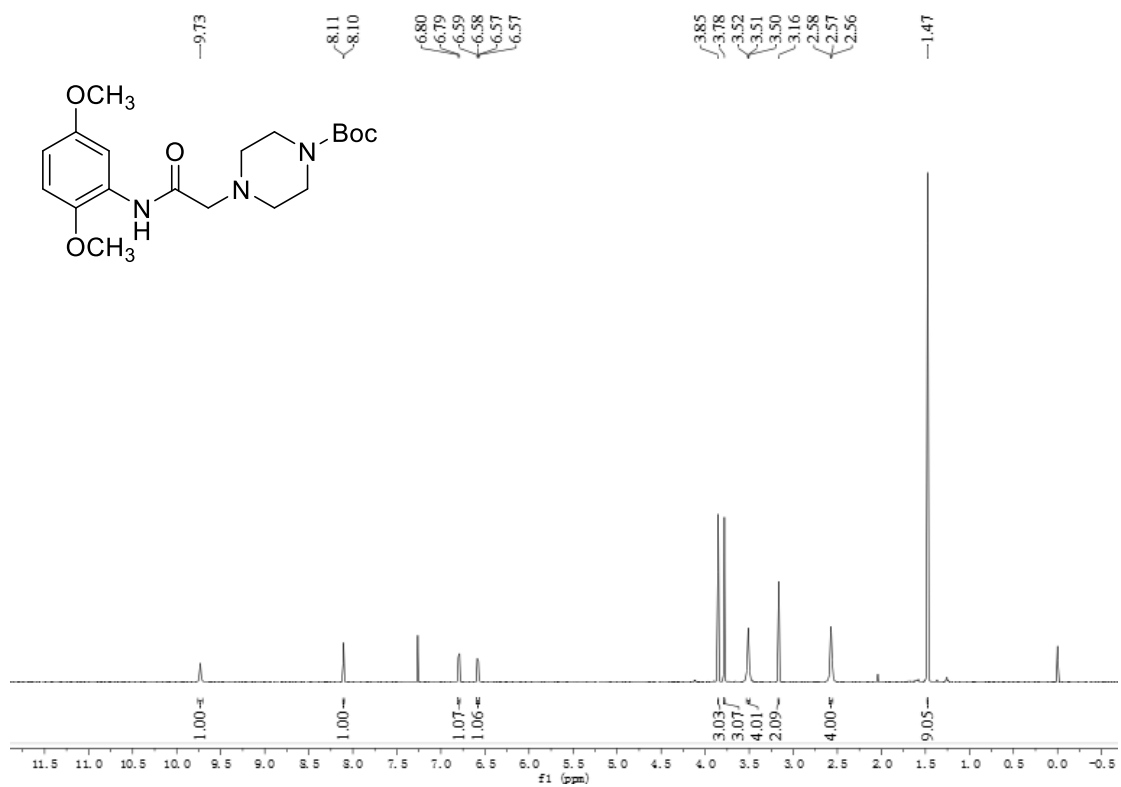

**Figure S23.** The  $^1\text{H-NMR}$  (600MHz,  $\text{CDCl}_3$ ) spectrum of compound 14

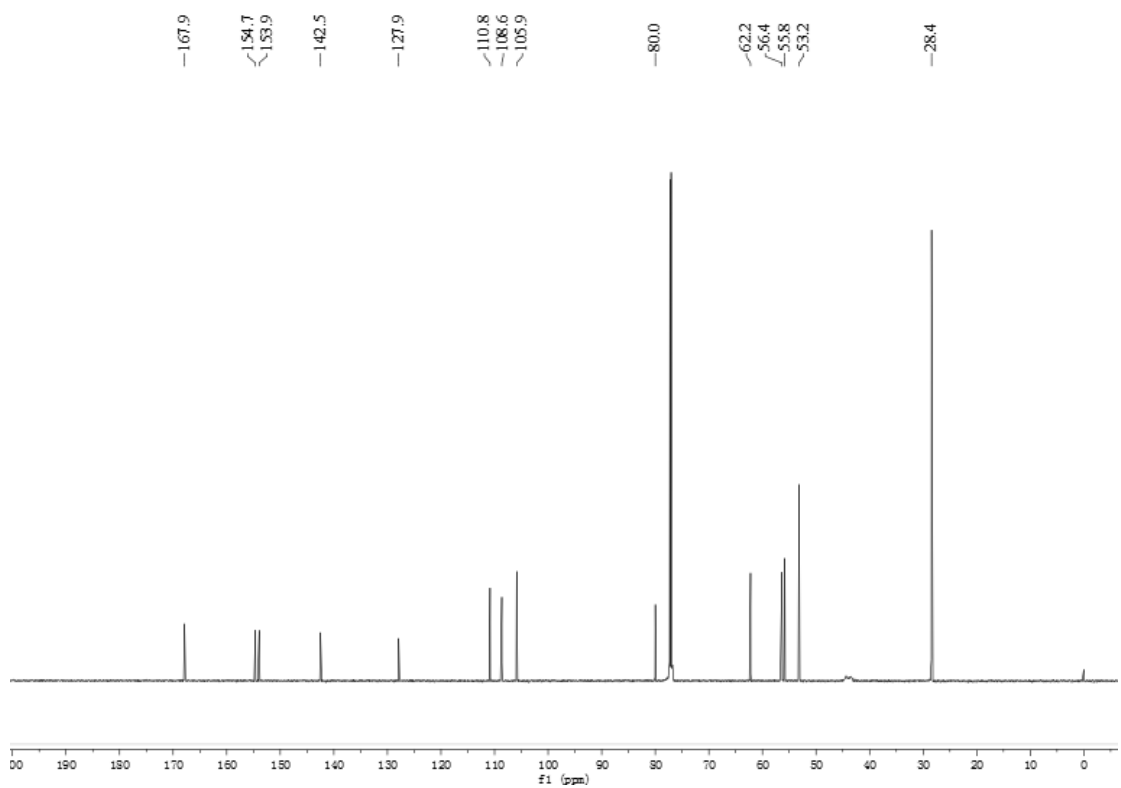

**Figure S24.** The  $^{13}\text{C-NMR}$  (150MHz,  $\text{CDCl}_3$ ) spectrum of compound 14

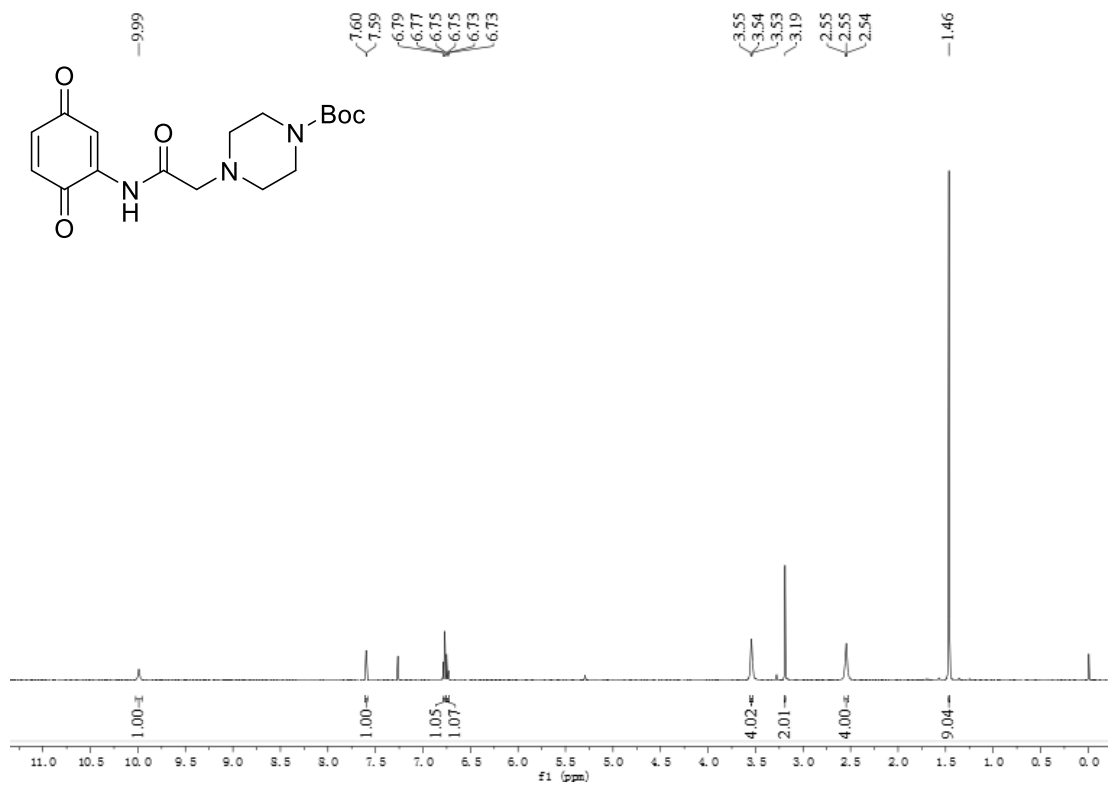

**Figure S25.** The <sup>1</sup>H-NMR (600MHz, CDCl<sub>3</sub>) spectrum of compound **15**

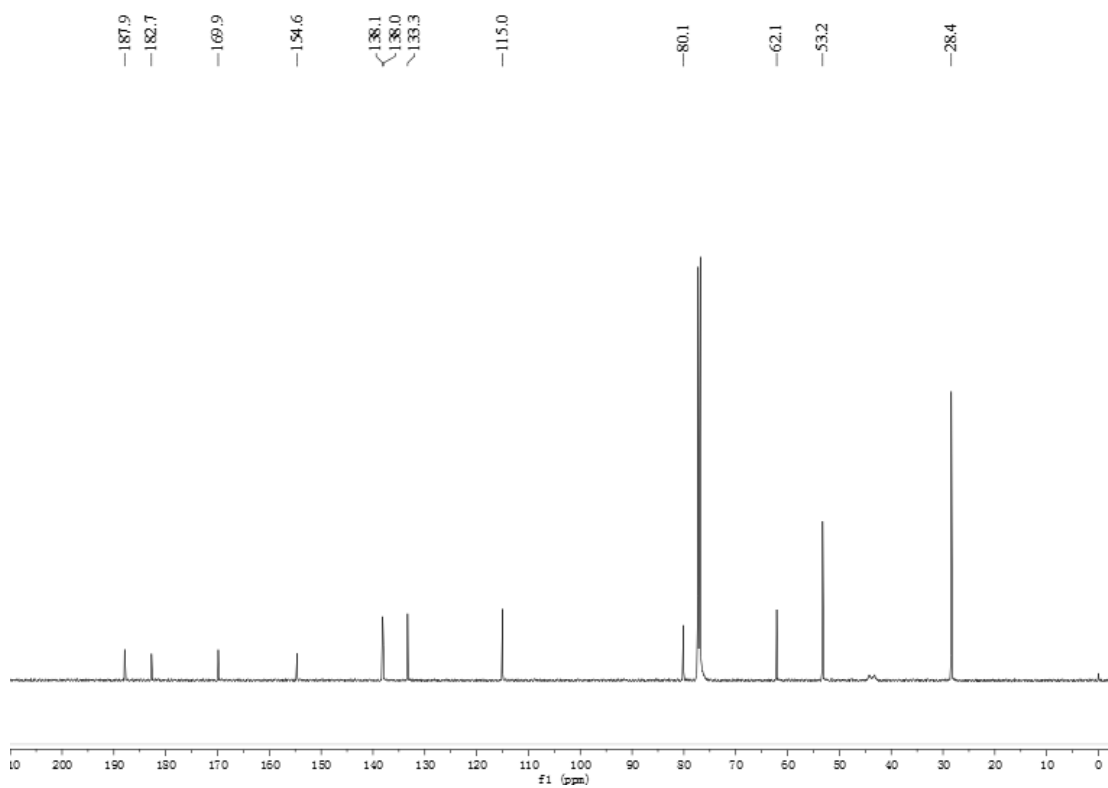

**Figure S26.** The <sup>13</sup>C-NMR (150MHz, CDCl<sub>3</sub>) spectrum of compound **15**

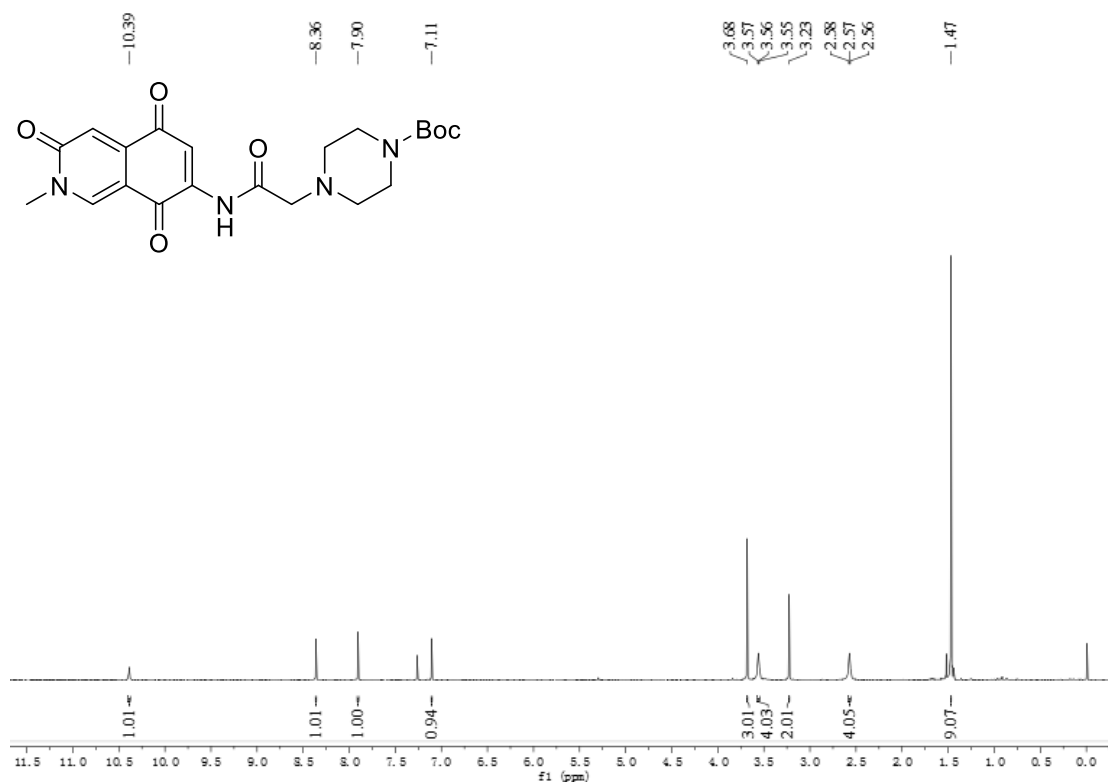

**Figure S27.** The <sup>1</sup>H-NMR (600MHz, CDCl<sub>3</sub>) spectrum of compound **16**

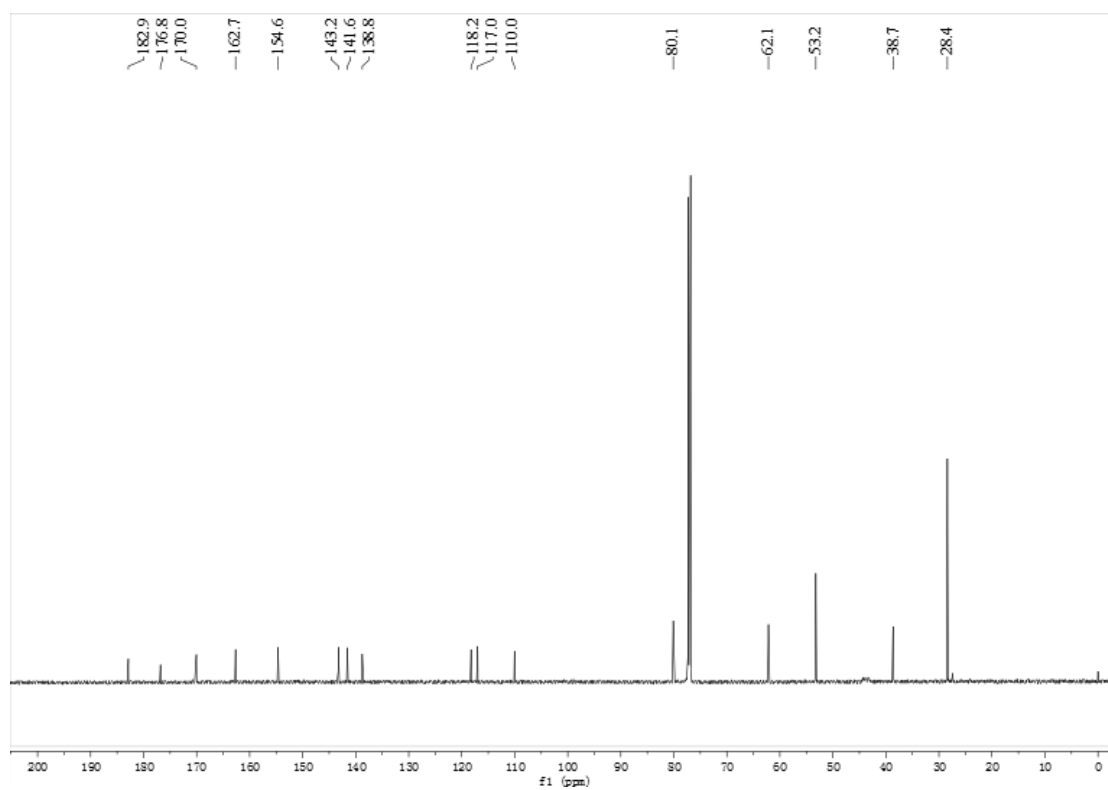

**Figure S28.** The <sup>13</sup>C-NMR (150MHz, CDCl<sub>3</sub>) spectrum of compound **16**

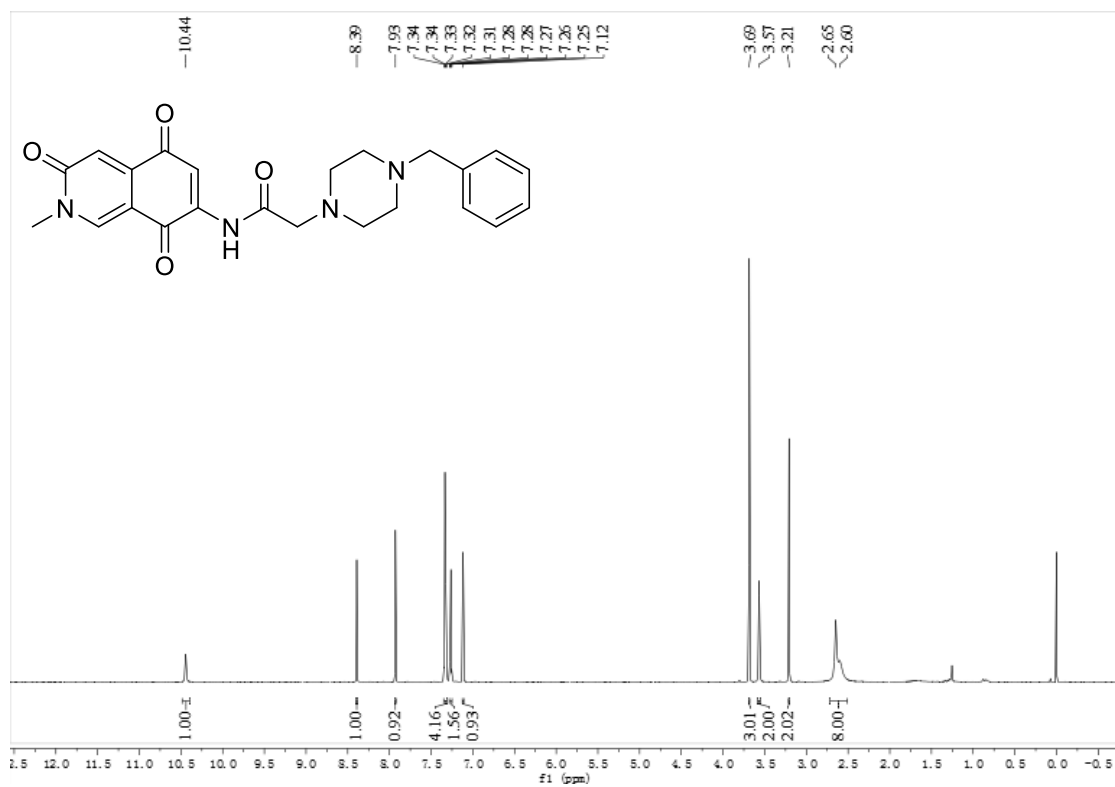

**Figure S29.** The <sup>1</sup>H-NMR (600MHz, CDCl<sub>3</sub>) spectrum of compound **1a**

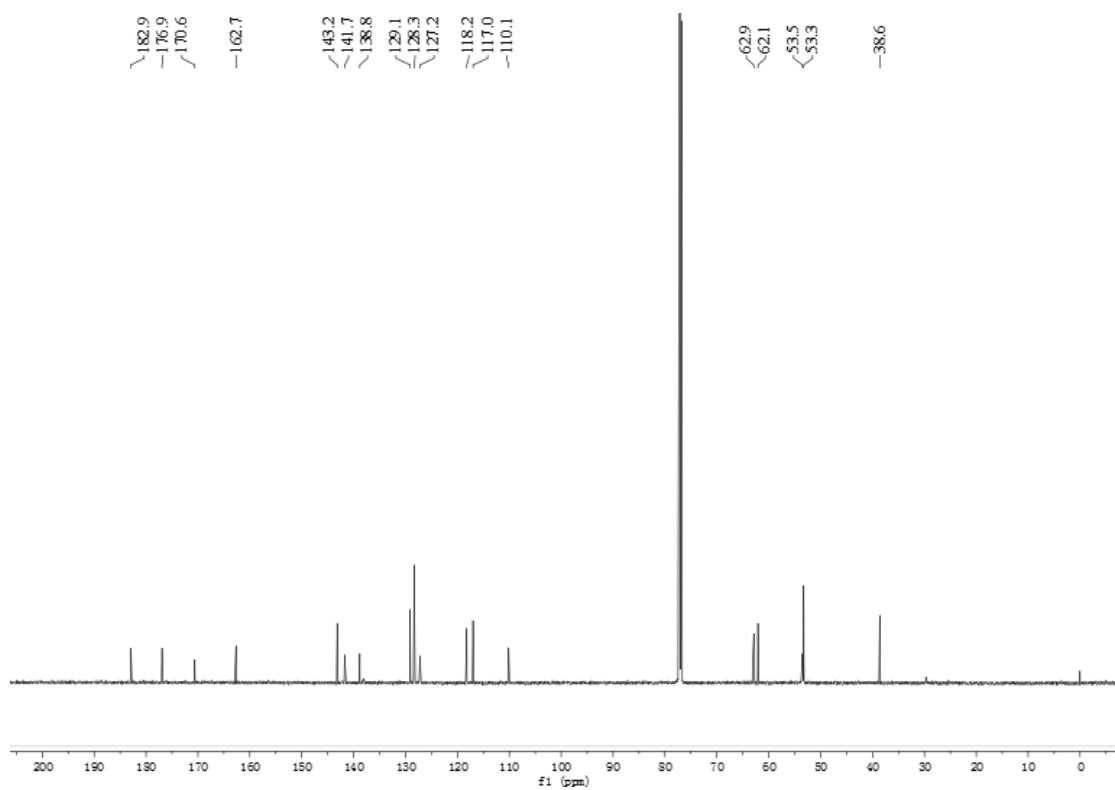

**Figure S30.** The <sup>13</sup>C-NMR (150MHz, CDCl<sub>3</sub>) spectrum of compound **1a**



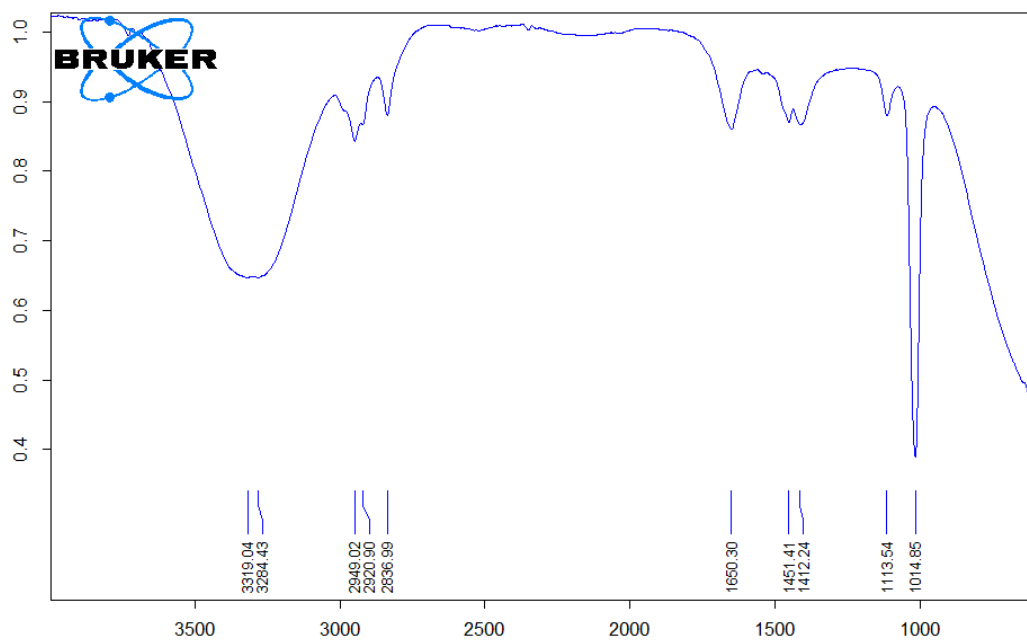

Figure S31. The IR spectrum of compound 1a

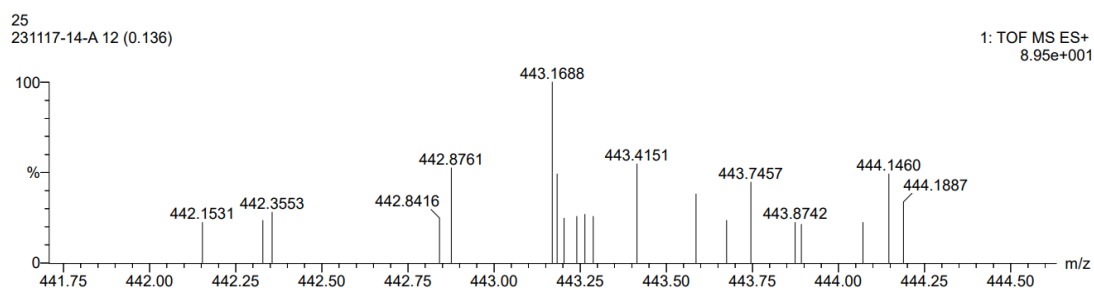

Figure S32. The HRMS of compound 1a

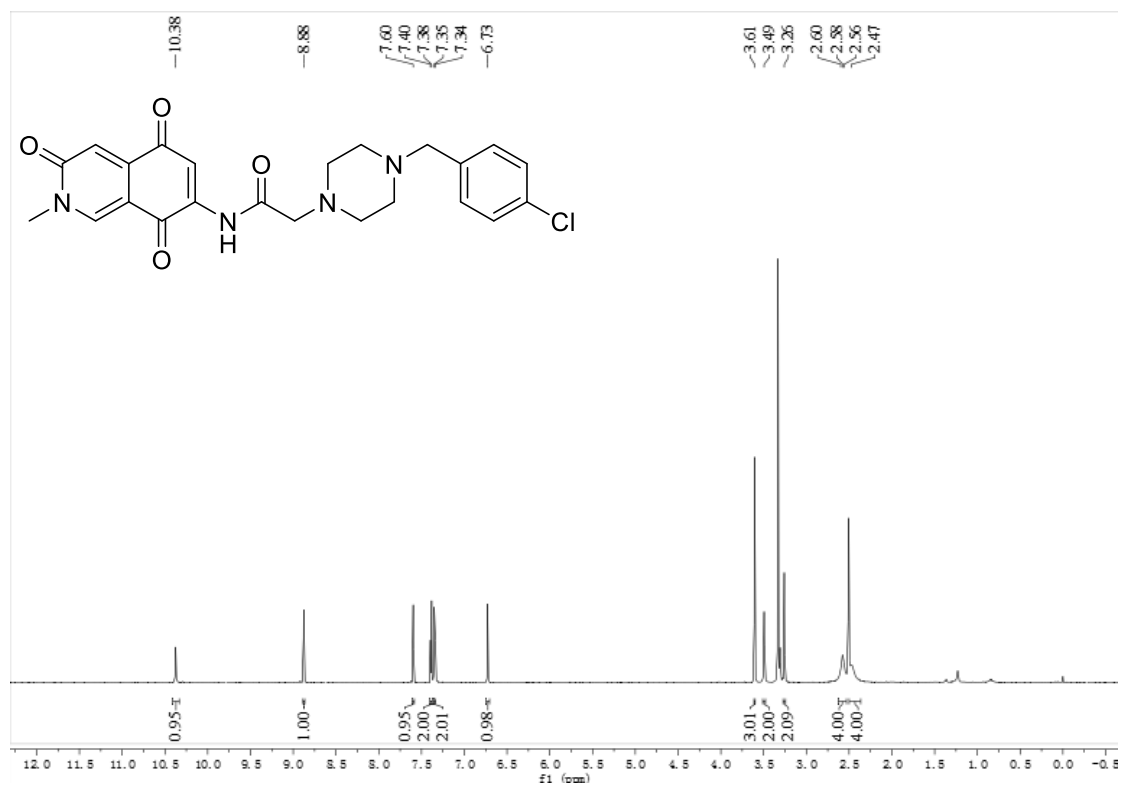

**Figure S33.** The <sup>1</sup>H-NMR (600MHz, DMSO-*d*<sub>6</sub>) spectrum of compound **1b**

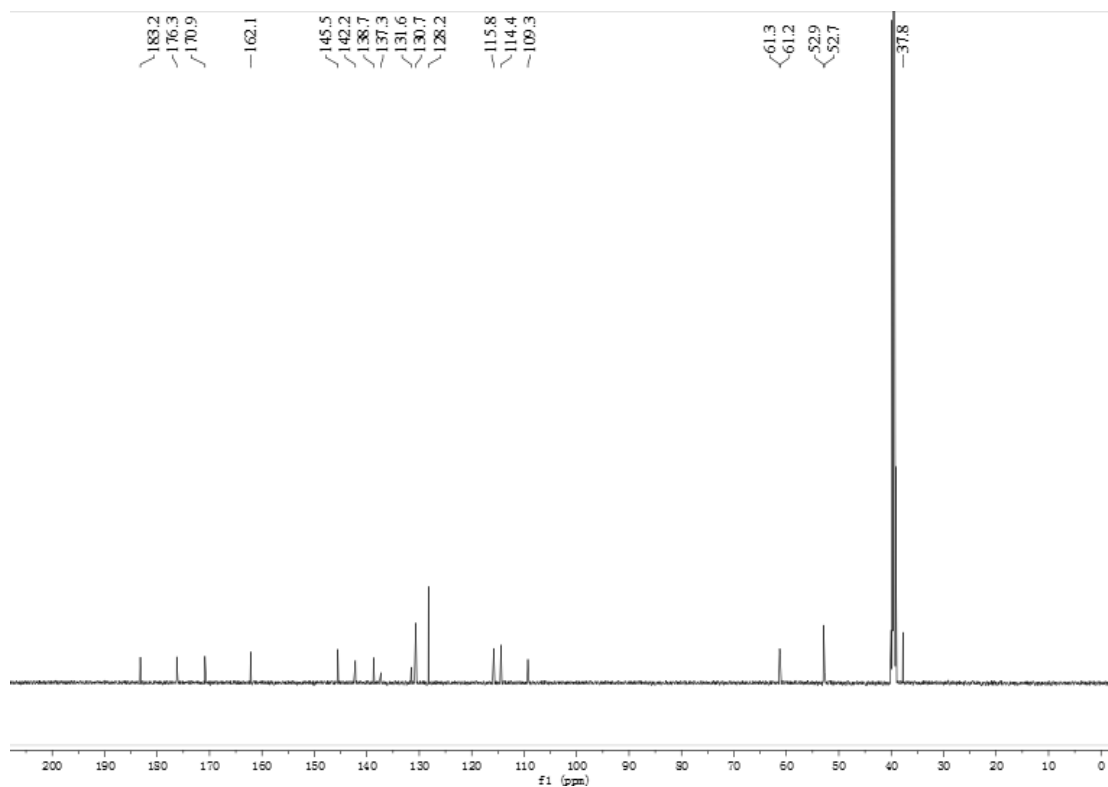

**Figure S34.** The <sup>13</sup>C-NMR (150MHz, DMSO-*d*<sub>6</sub>) spectrum of compound **1b**

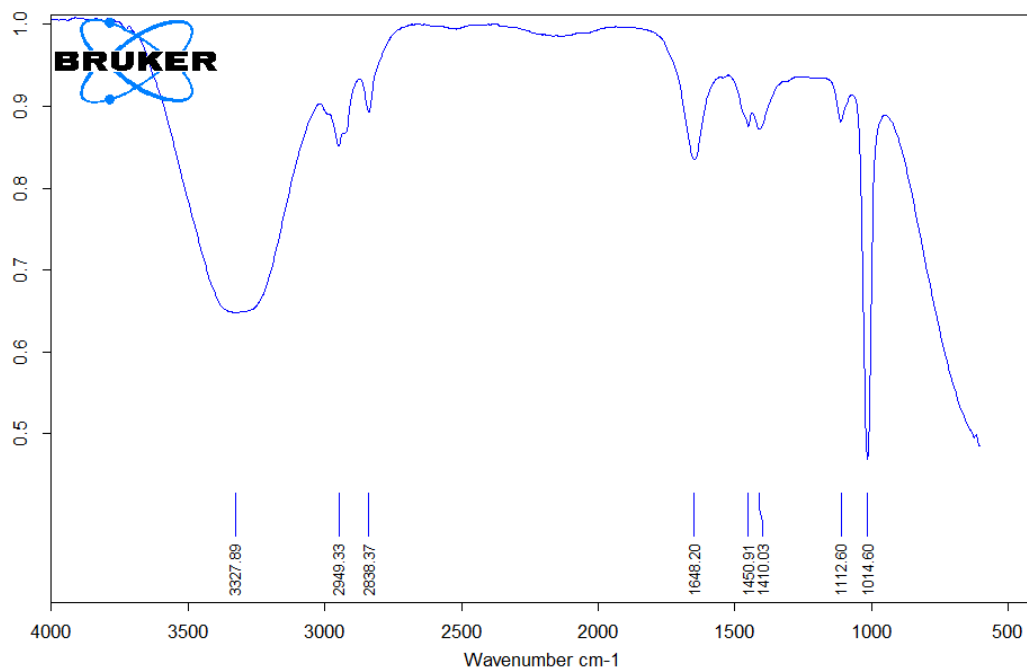

**Figure S35.** The IR spectrum of compound **1b**

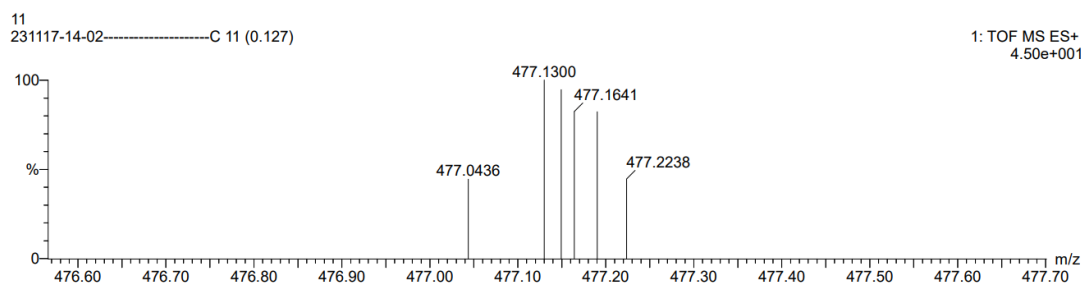

**Figure S36.** The HRESIMS of compound **1b**

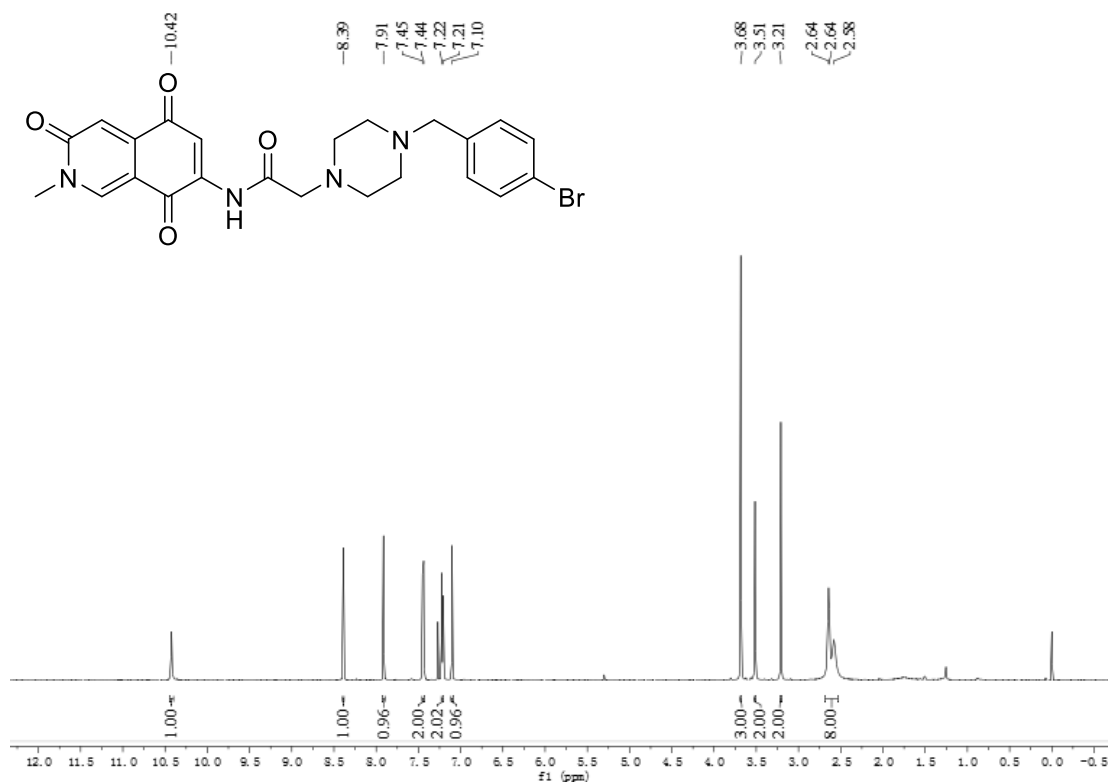

**Figure S37.** The <sup>1</sup>H-NMR (600MHz, CDCl<sub>3</sub>) spectrum of compound **1c**

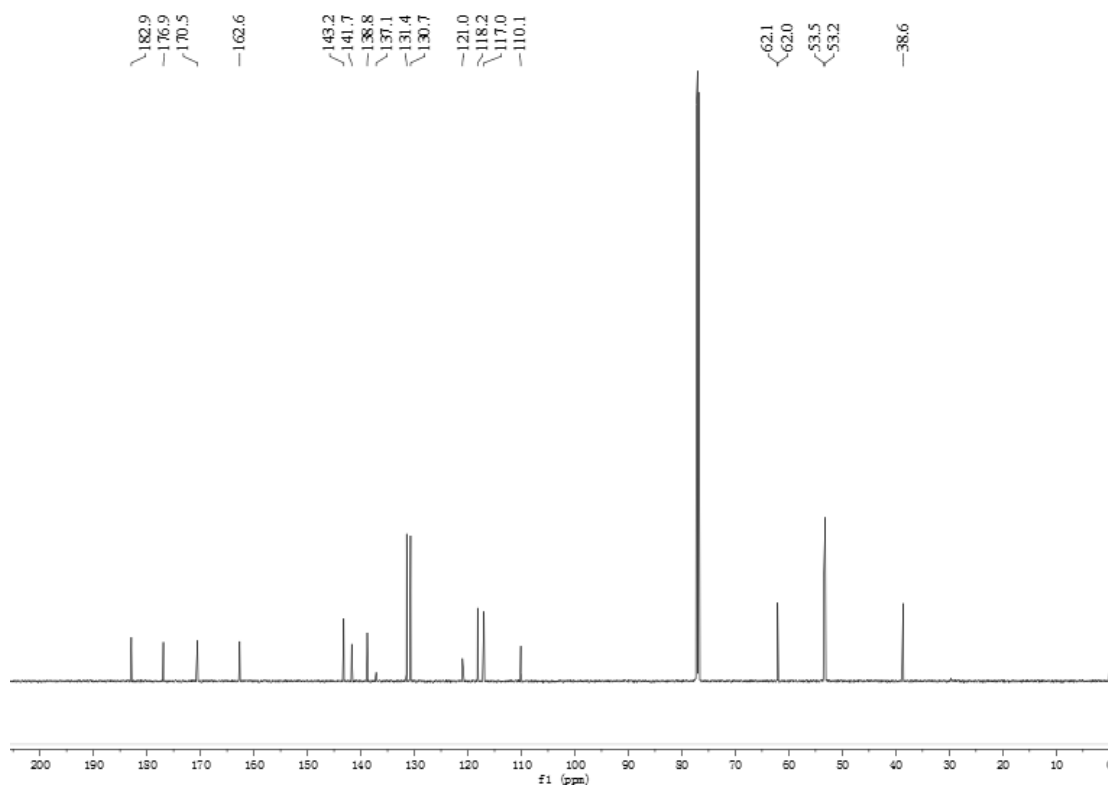

**Figure S38.** The <sup>13</sup>C-NMR (150MHz, CDCl<sub>3</sub>) spectrum of compound **1c**

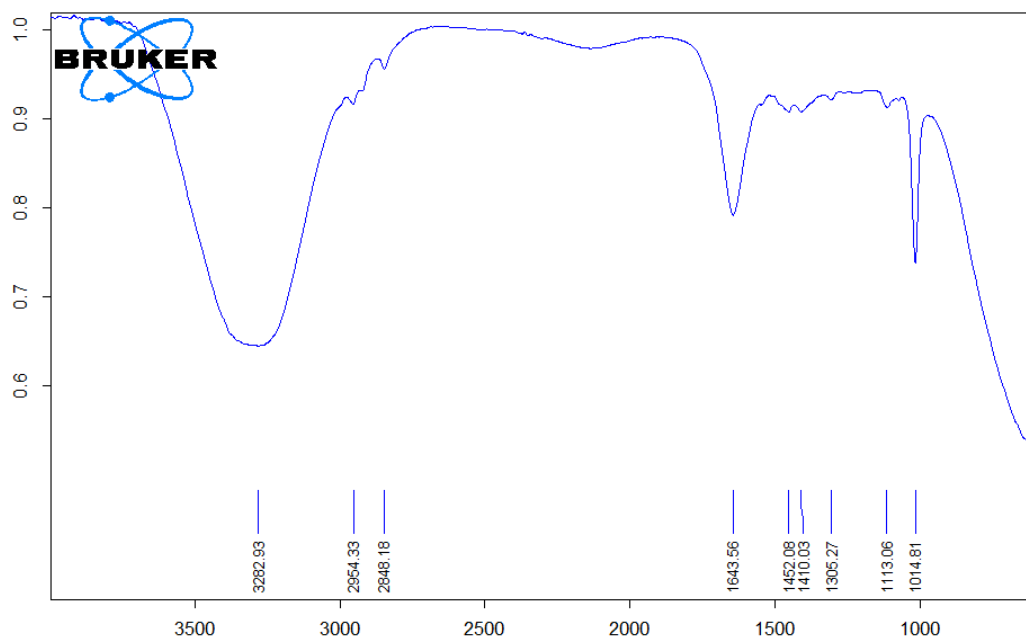

Figure S39. The IR spectrum of compound 1c

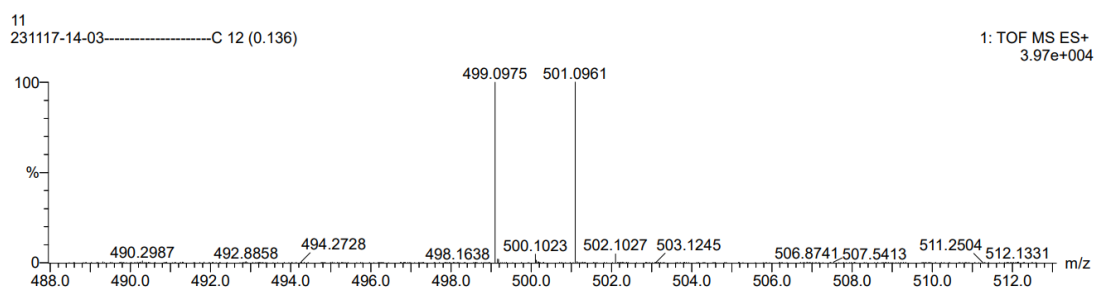

Figure S40. The HRESIMS of compound 1c

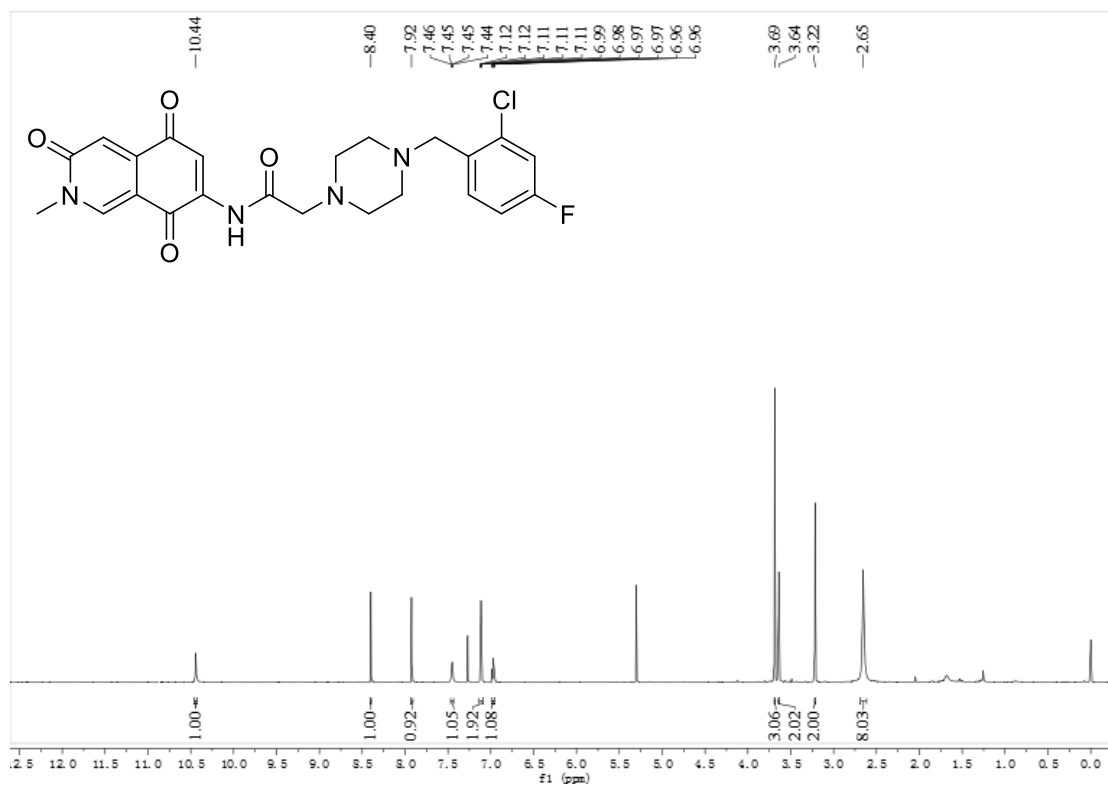

**Figure S41.** The <sup>1</sup>H-NMR (600MHz, CDCl<sub>3</sub>) spectrum of compound **1d**

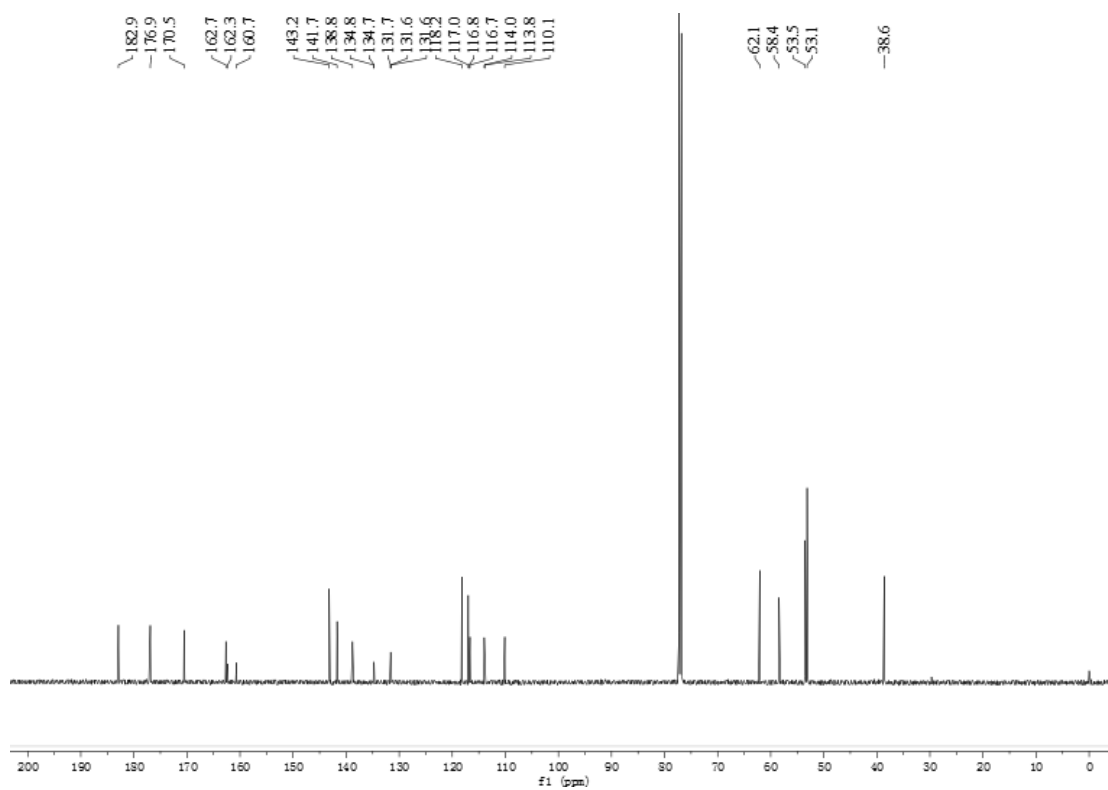

**Figure S42.** The <sup>13</sup>C-NMR (150MHz, CDCl<sub>3</sub>) spectrum of compound **1d**

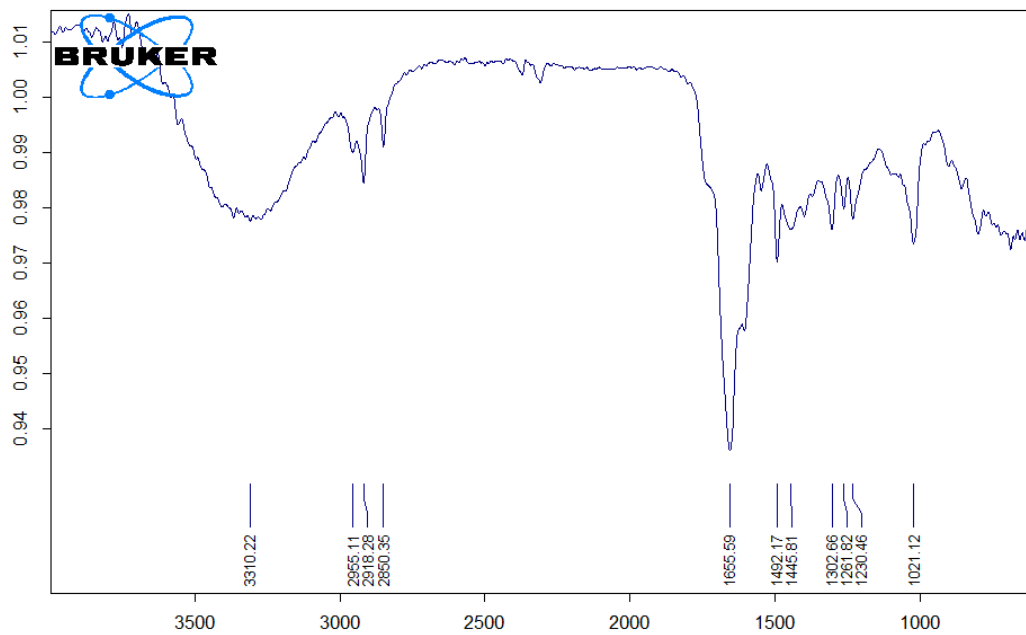

**Figure S43.** The IR spectrum of compound **1d**

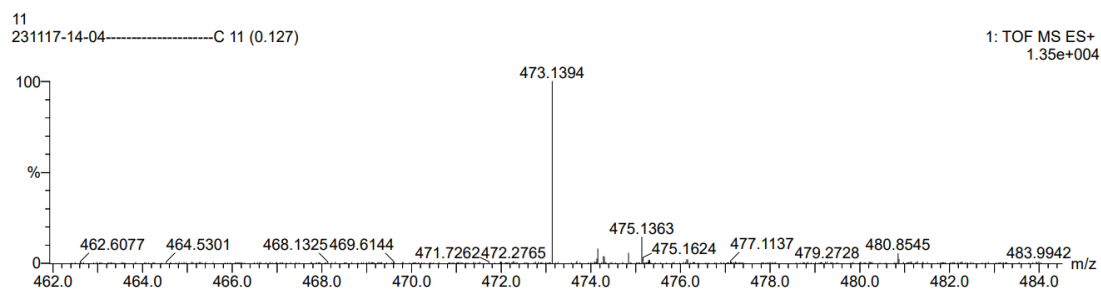

**Figure S44.** The HRESIMS of compound **1d**

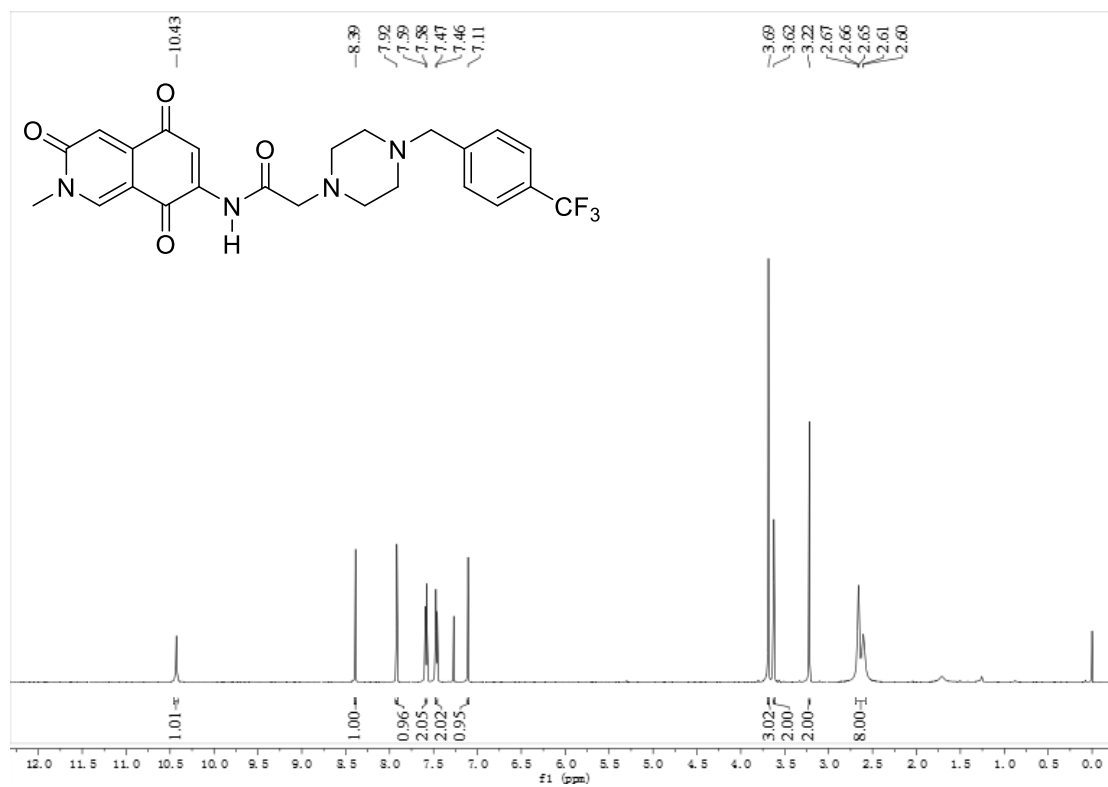

**Figure S45.** The  $^1\text{H-NMR}$  (600MHz,  $\text{CDCl}_3$ ) spectrum of compound **1e**

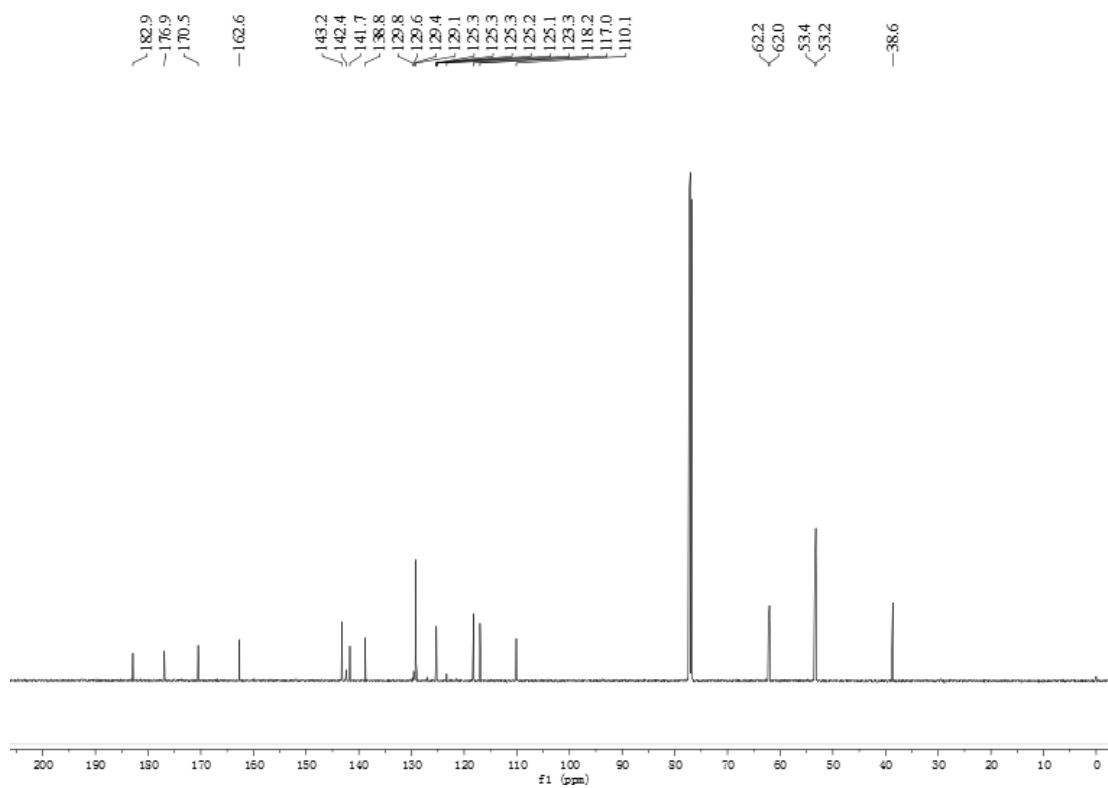

**Figure S46.** The  $^{13}\text{C-NMR}$  (150MHz,  $\text{CDCl}_3$ ) spectrum of compound **1e**



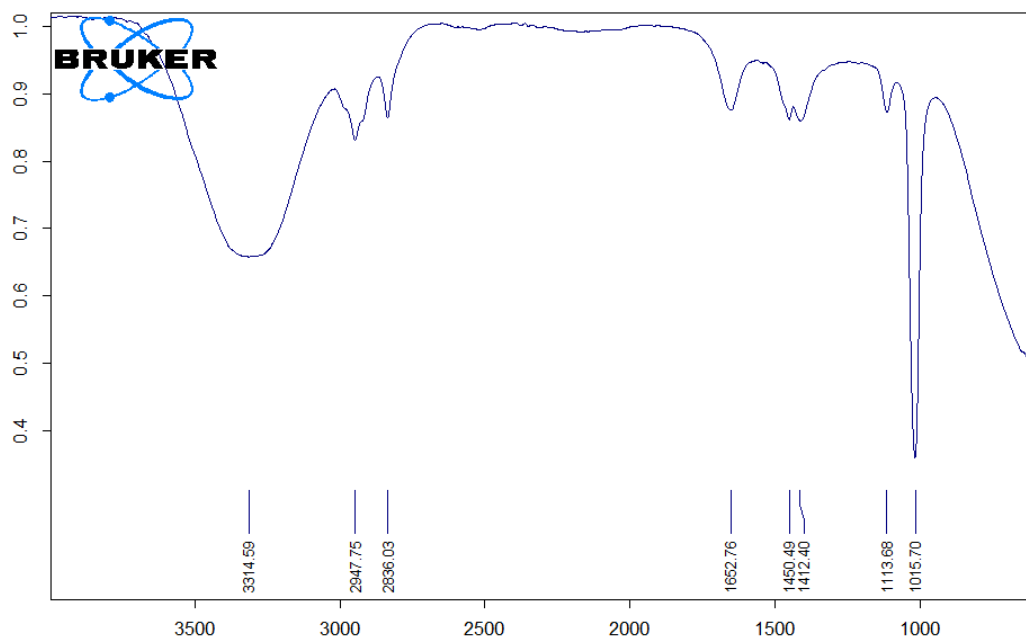

**Figure S47.** The IR spectrum of compound **1e**

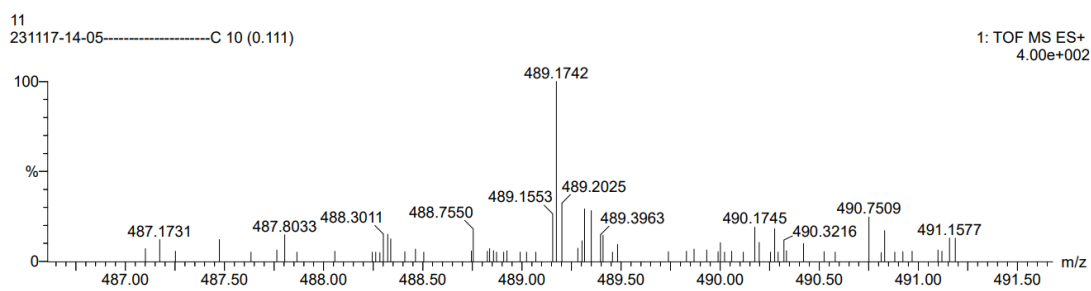

**Figure S48.** The HRMS of compound **1e**

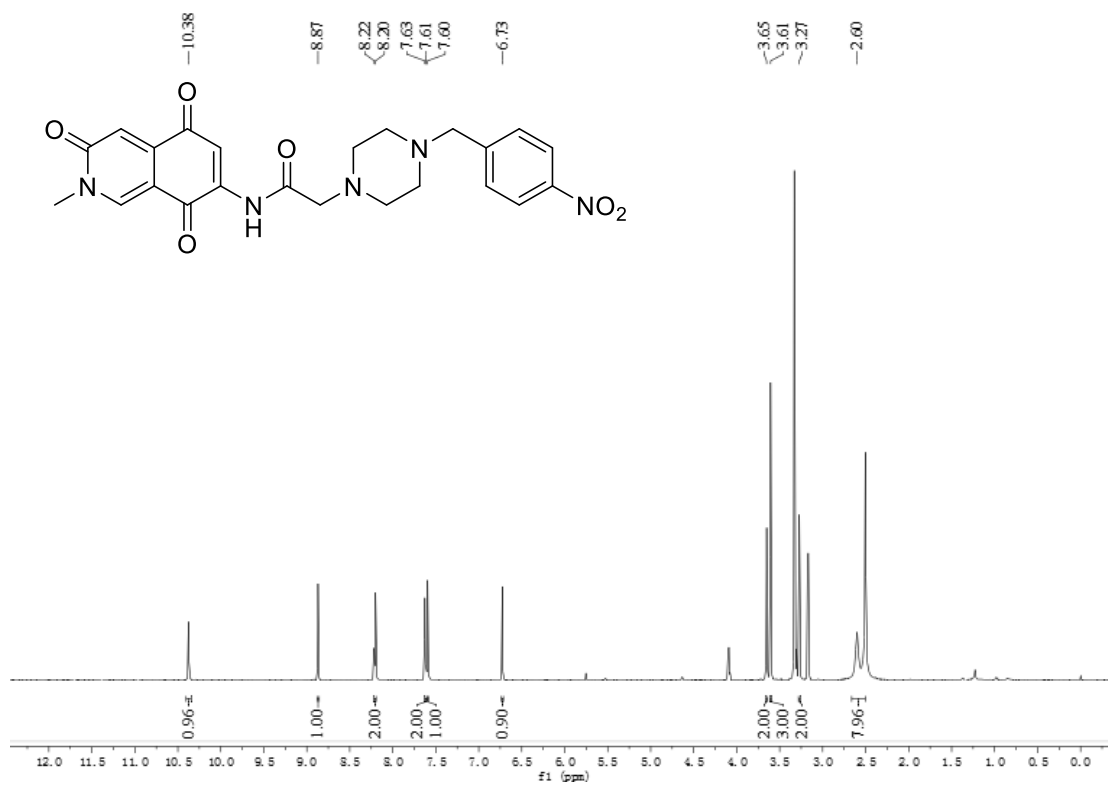

**Figure S49.** The  $^1\text{H-NMR}$  (600MHz,  $\text{DMSO-}d_6$ ) spectrum of compound **1f**

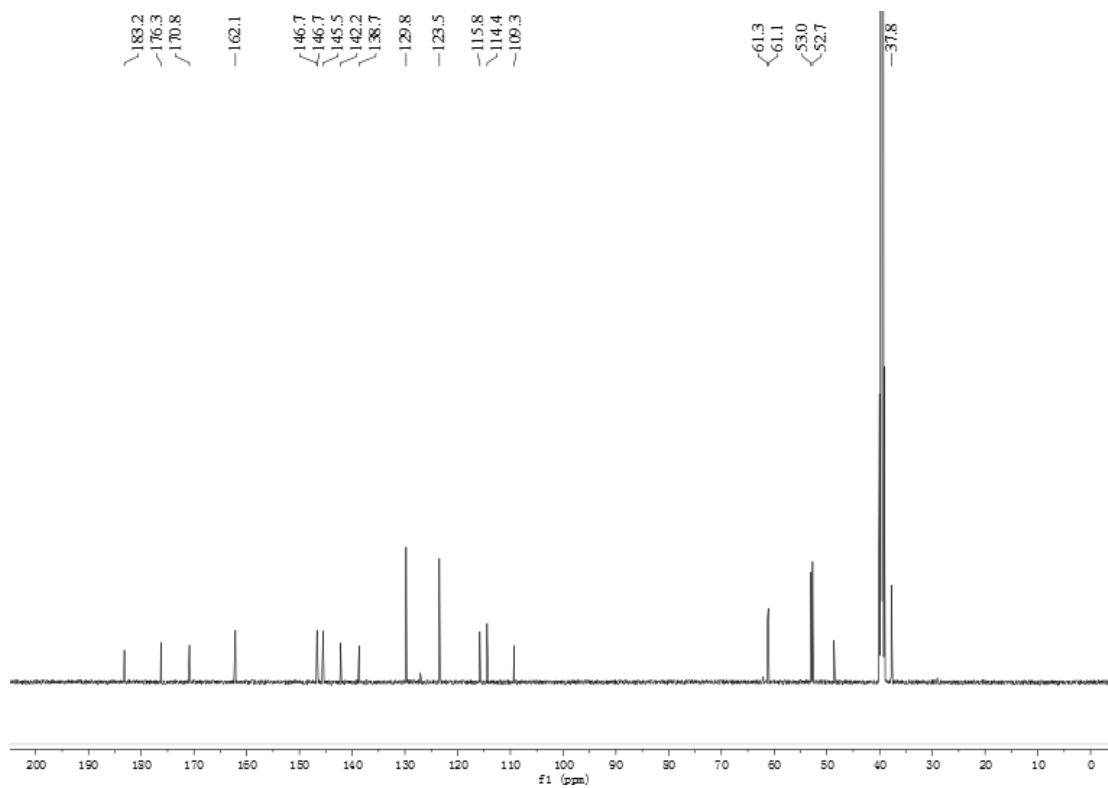

**Figure S50.** The  $^{13}\text{C-NMR}$  (150MHz,  $\text{DMSO-}d_6$ ) spectrum of compound **1f**

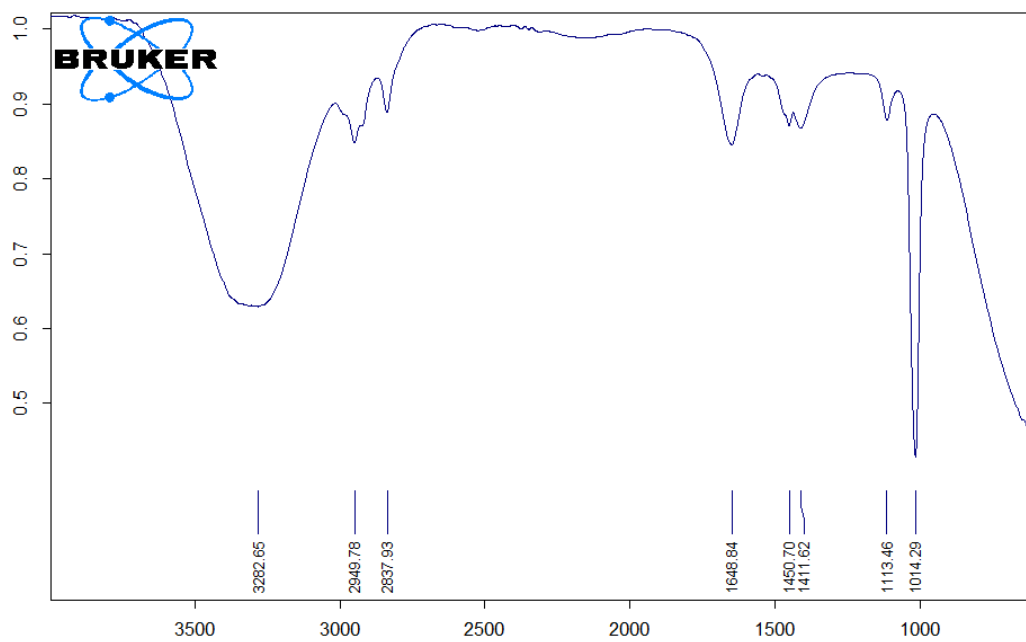

**Figure S51.** The IR spectrum of compound **1f**

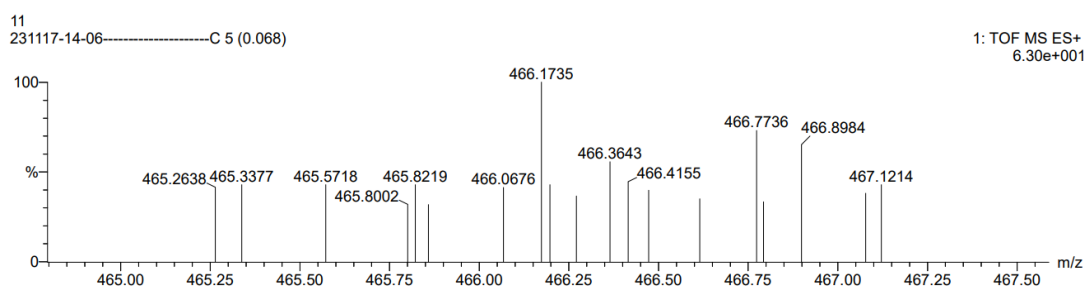

**Figure S52.** The HRESIMS of compound **1f**

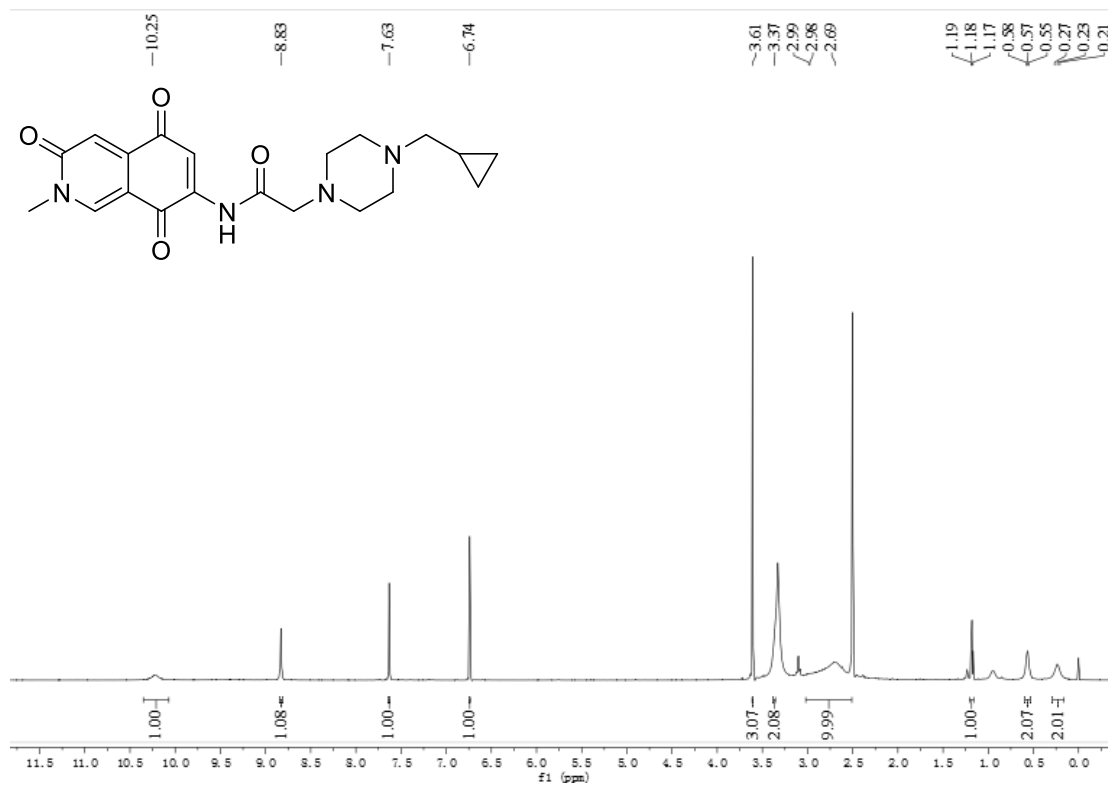

**Figure S53.** The <sup>1</sup>H-NMR (600MHz, DMSO-*d*<sub>6</sub>) spectrum of compound **1g**

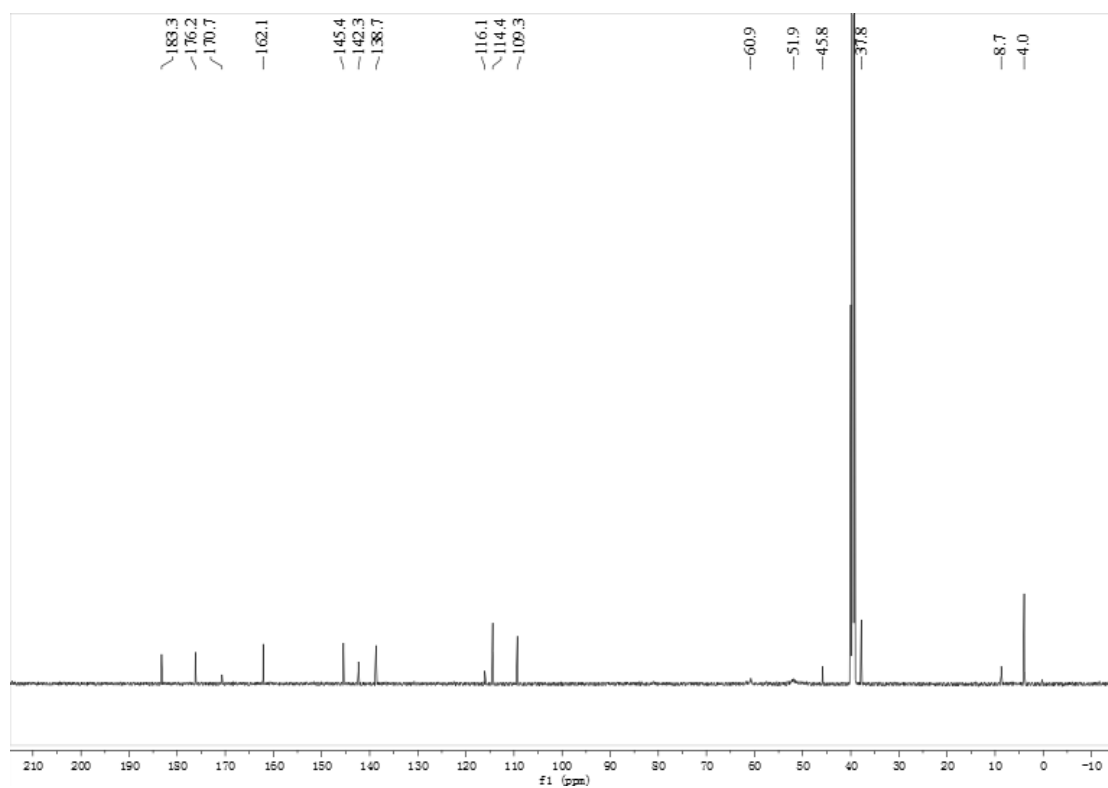

**Figure S54.** The <sup>13</sup>C-NMR (150MHz, DMSO-*d*<sub>6</sub>) spectrum of compound **1g**

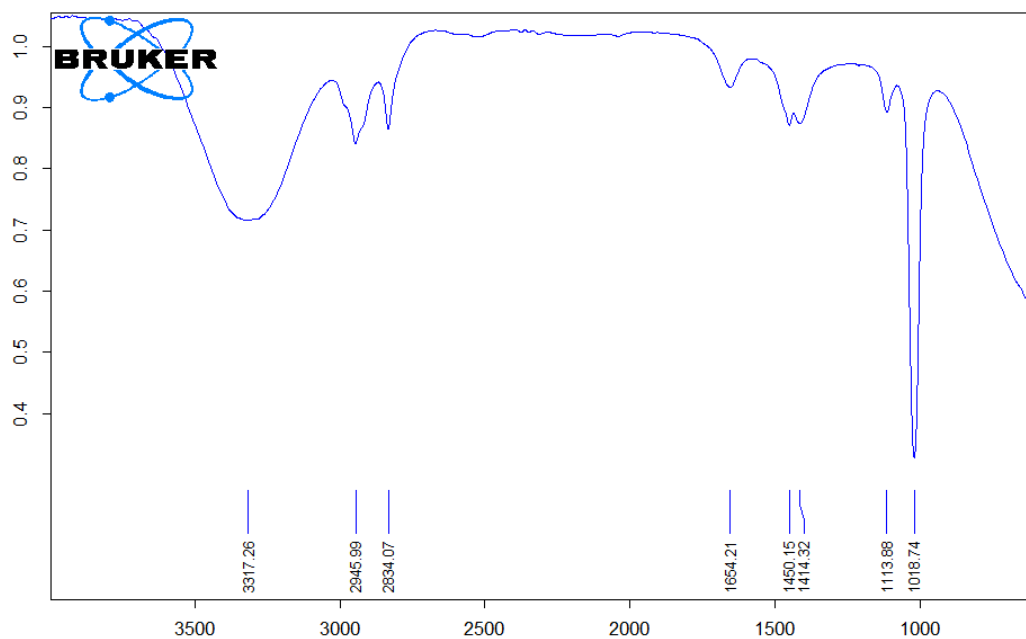

Figure S55. The IR spectrum of compound **1g**

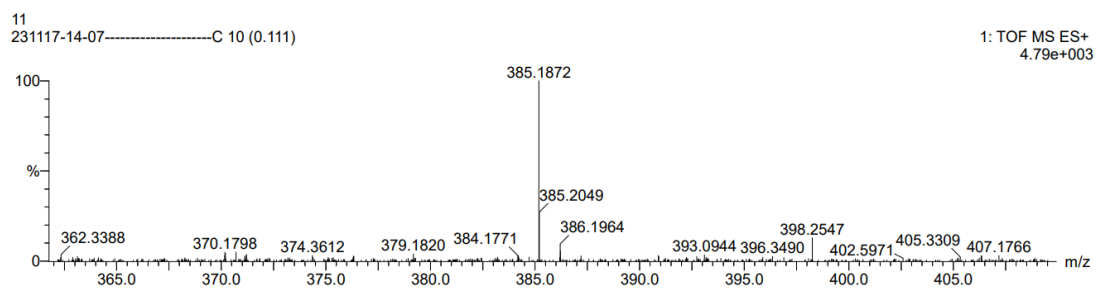

Figure S56 The HRESIMS of compound **1g**

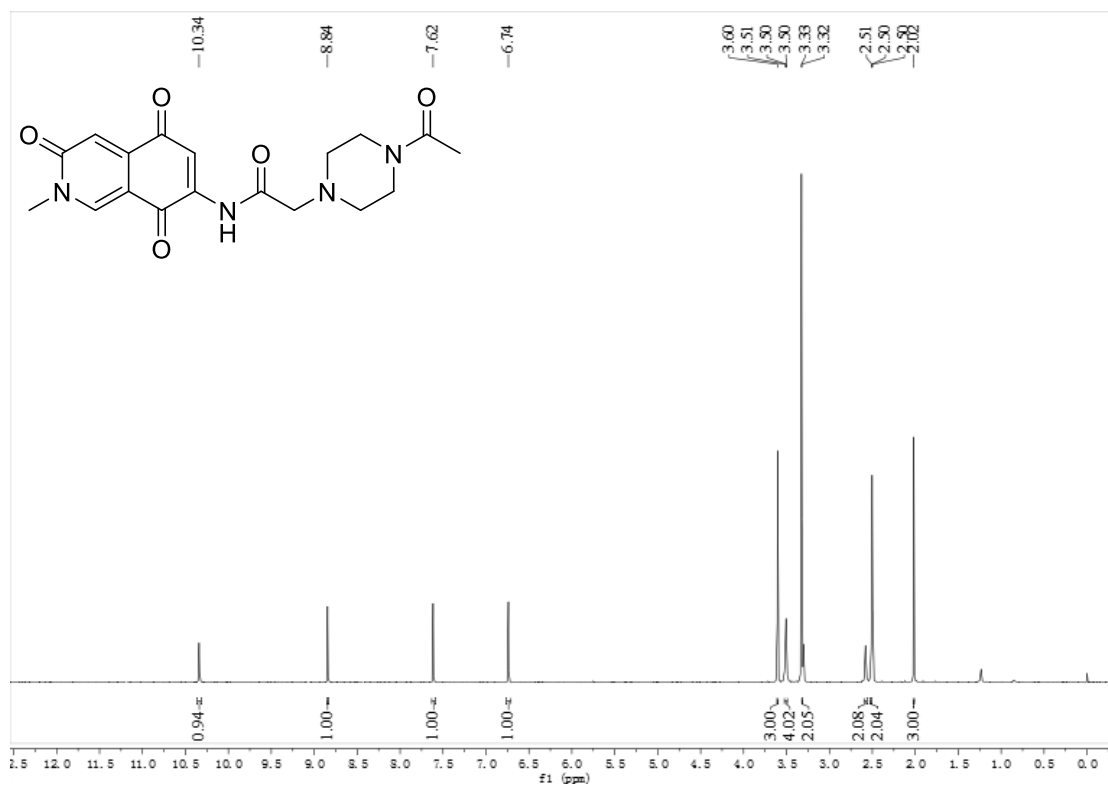

**Figure S57.** The <sup>1</sup>H-NMR (600MHz, DMSO-*d*<sub>6</sub>) spectrum of compound **1h**

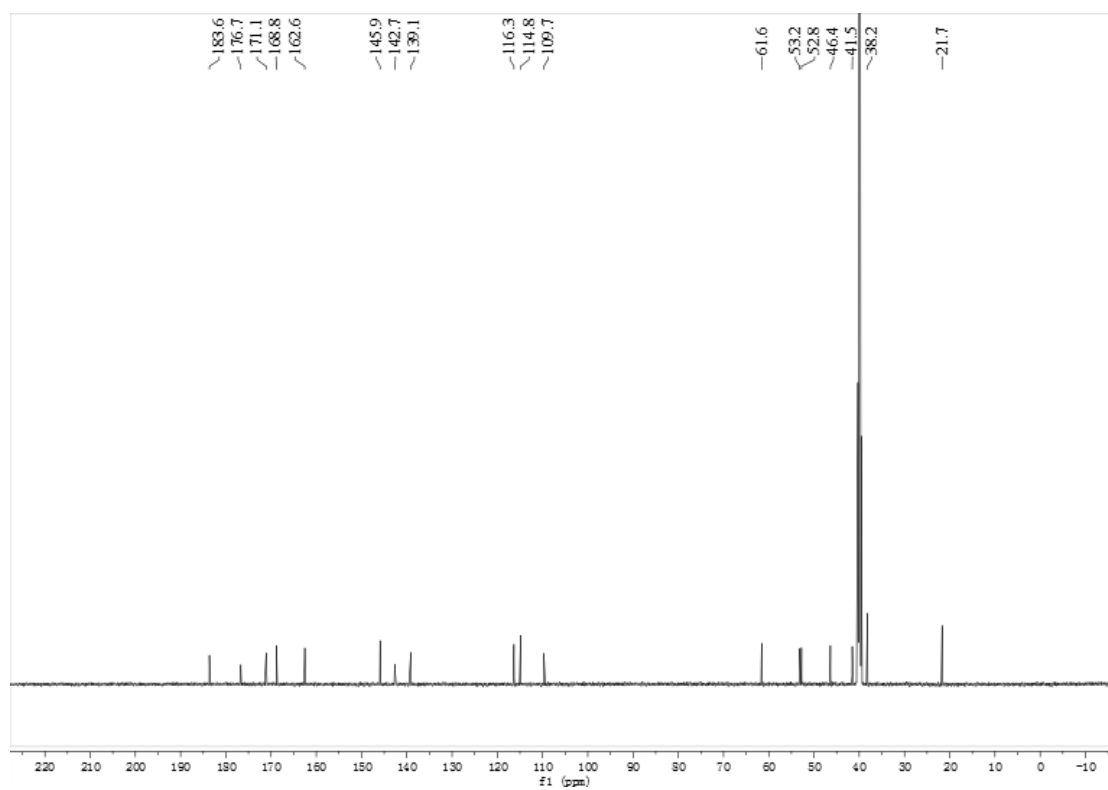

**Figure S58.** The <sup>13</sup>C-NMR (150MHz, DMSO-*d*<sub>6</sub>) spectrum of compound **1h**

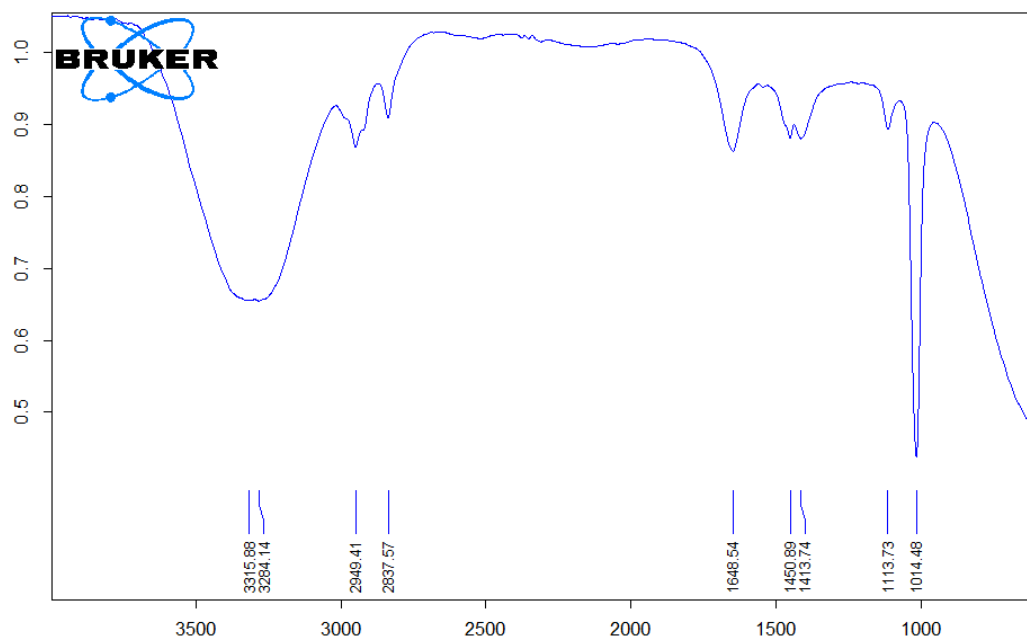

**Figure S59.** The IR spectrum of compound **1h**

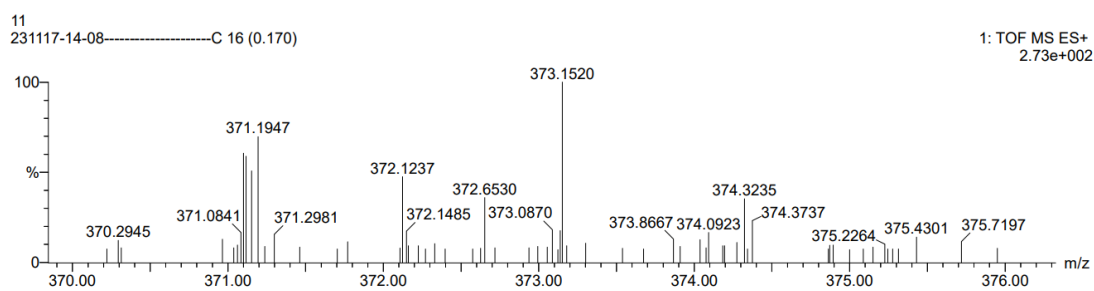

**Figure S60.** The HRESIMS of compound **1h**

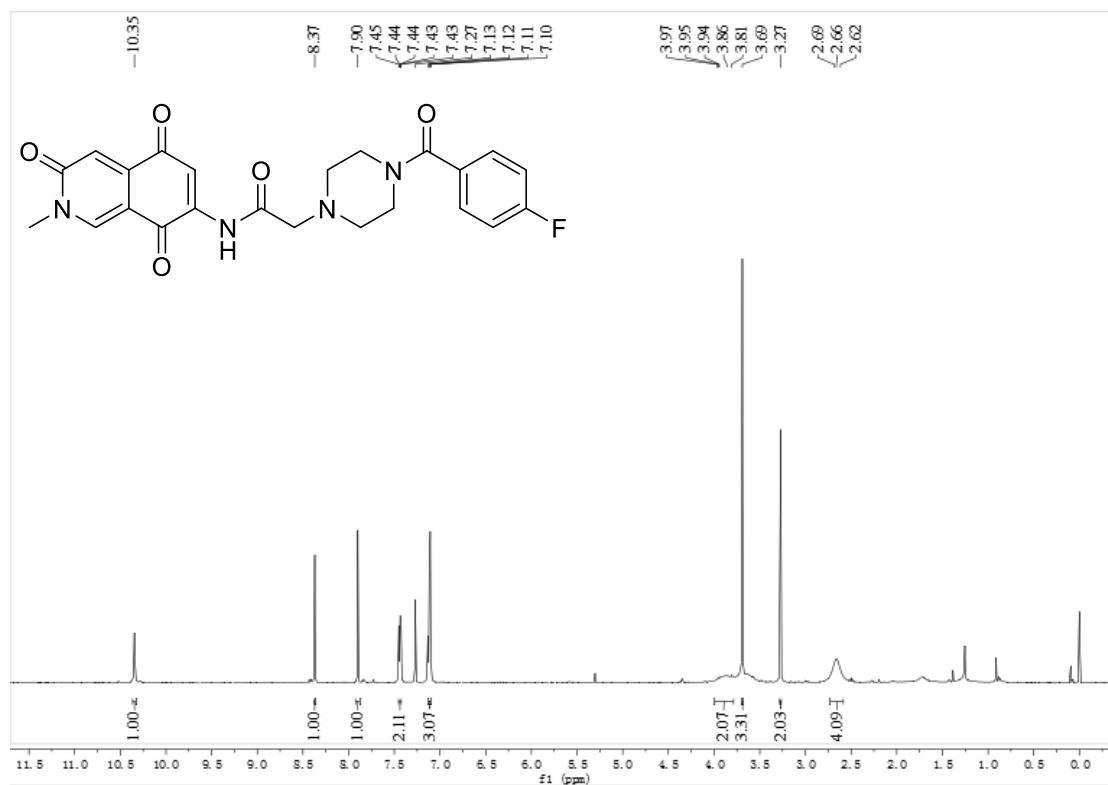

**Figure S61.** The <sup>1</sup>H-NMR (600MHz, CDCl<sub>3</sub>) spectrum of compound **1i**

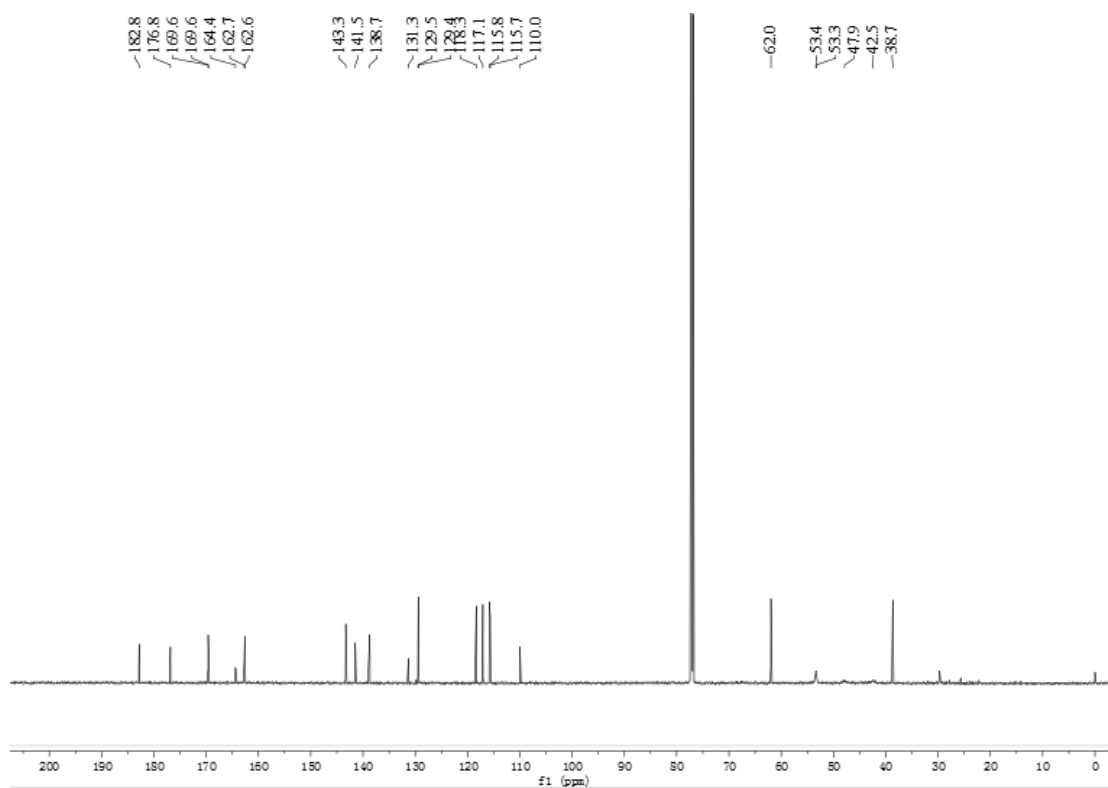

**Figure S62.** The <sup>13</sup>C-NMR (150MHz, CDCl<sub>3</sub>) spectrum of compound **1i**



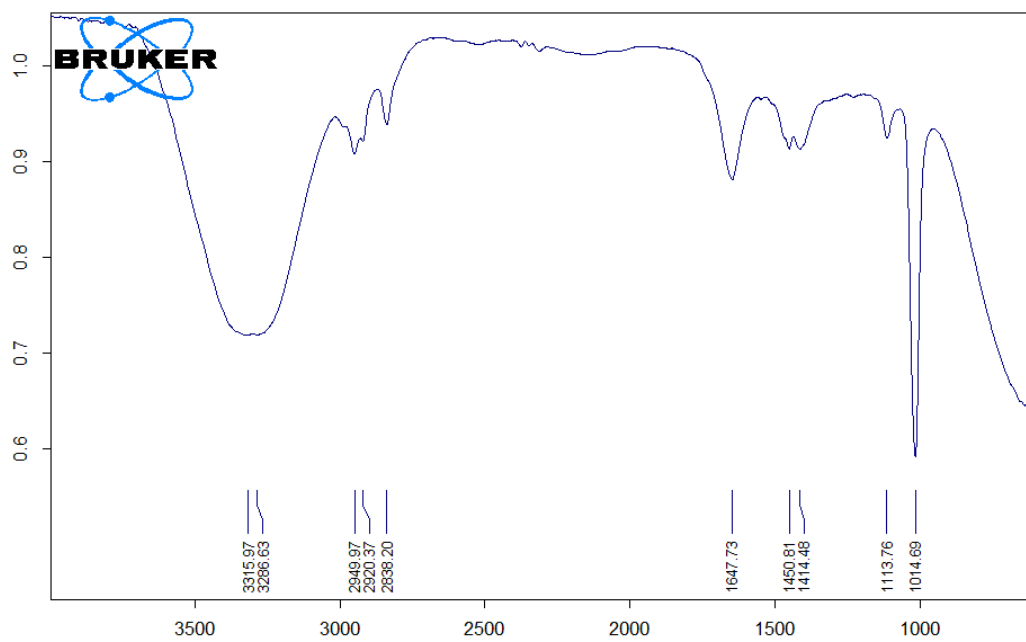

**Figure S63.** The IR spectrum of compound **1i**

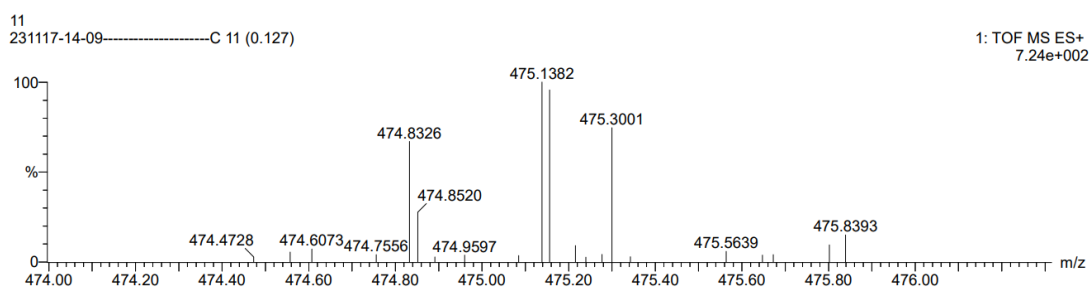

**Figure S64.** The HRESIMS of compound **1i**

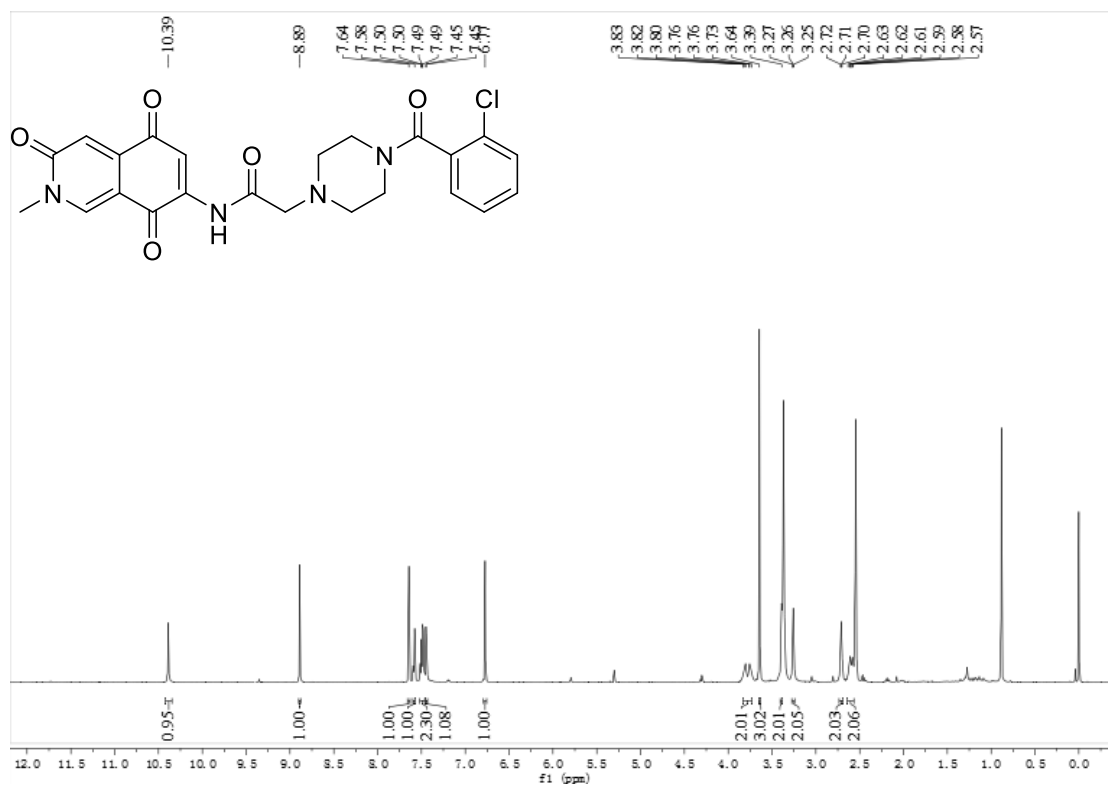

**Figure S65.** The <sup>1</sup>H-NMR (600MHz, DMSO-*d*<sub>6</sub>) spectrum of compound **1j**

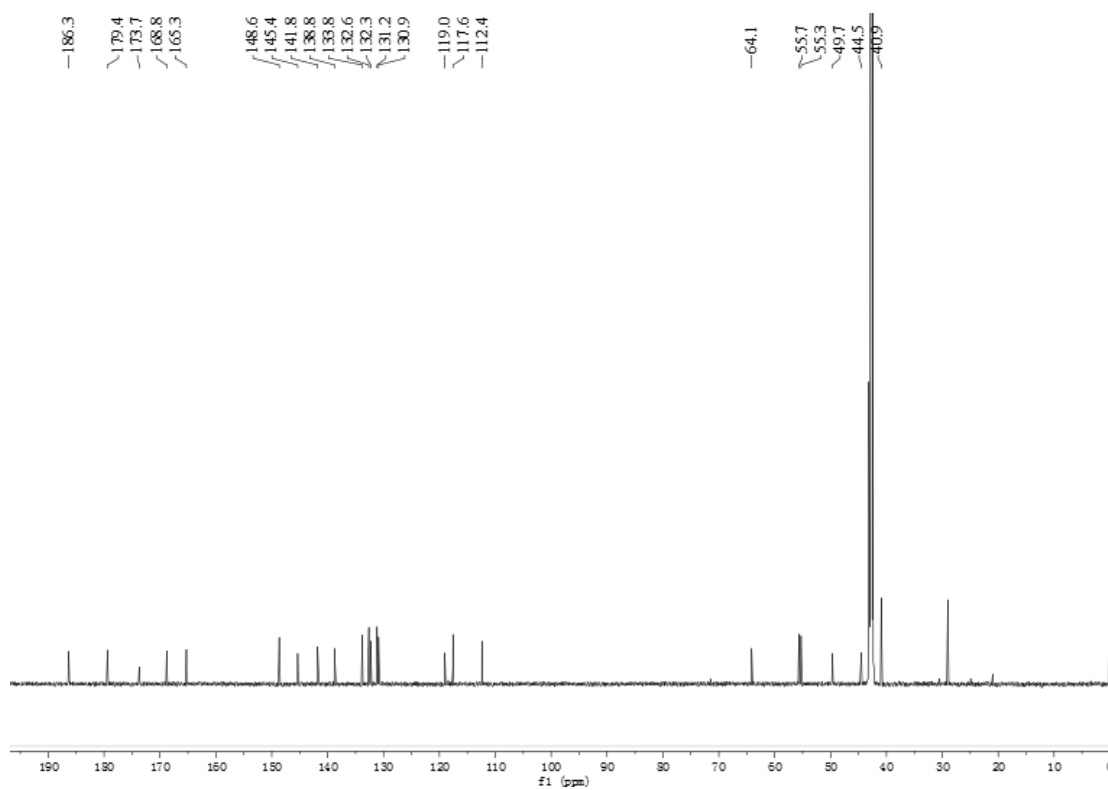

**Figure S66.** The <sup>13</sup>C-NMR (150MHz, DMSO-*d*<sub>6</sub>) spectrum of compound **1j**

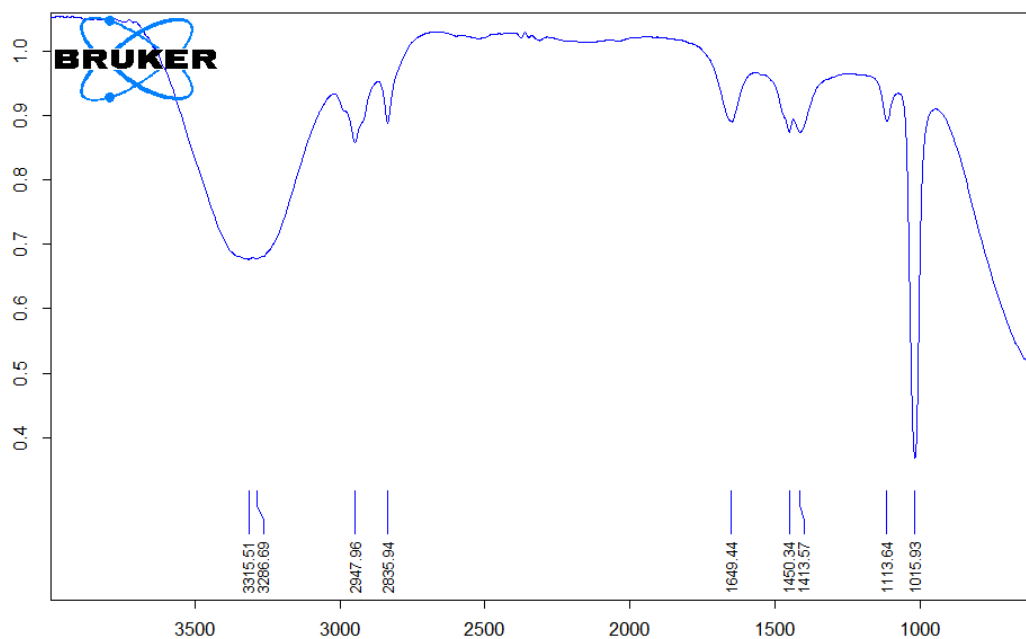

**Figure S67.** The IR spectrum of compound **1j**

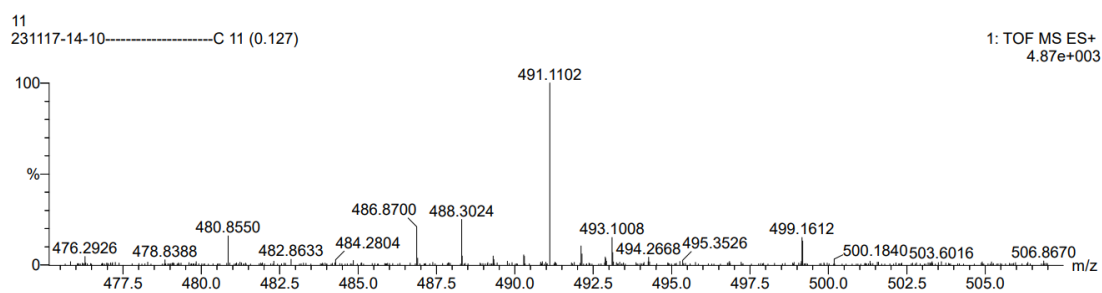

**Figure S68.** The HRESIMS of compound **1j**

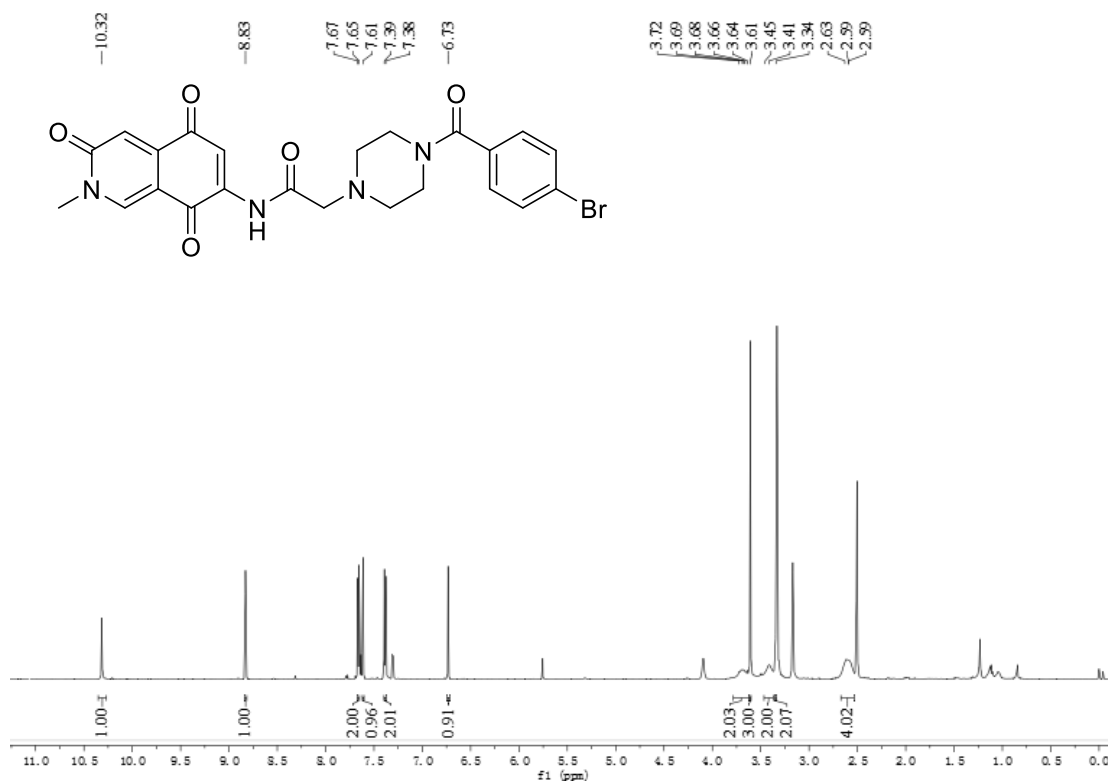

**Figure S69.** The  $^1\text{H}$ -NMR (600MHz,  $\text{DMSO-}d_6$ ) spectrum of compound **1k**

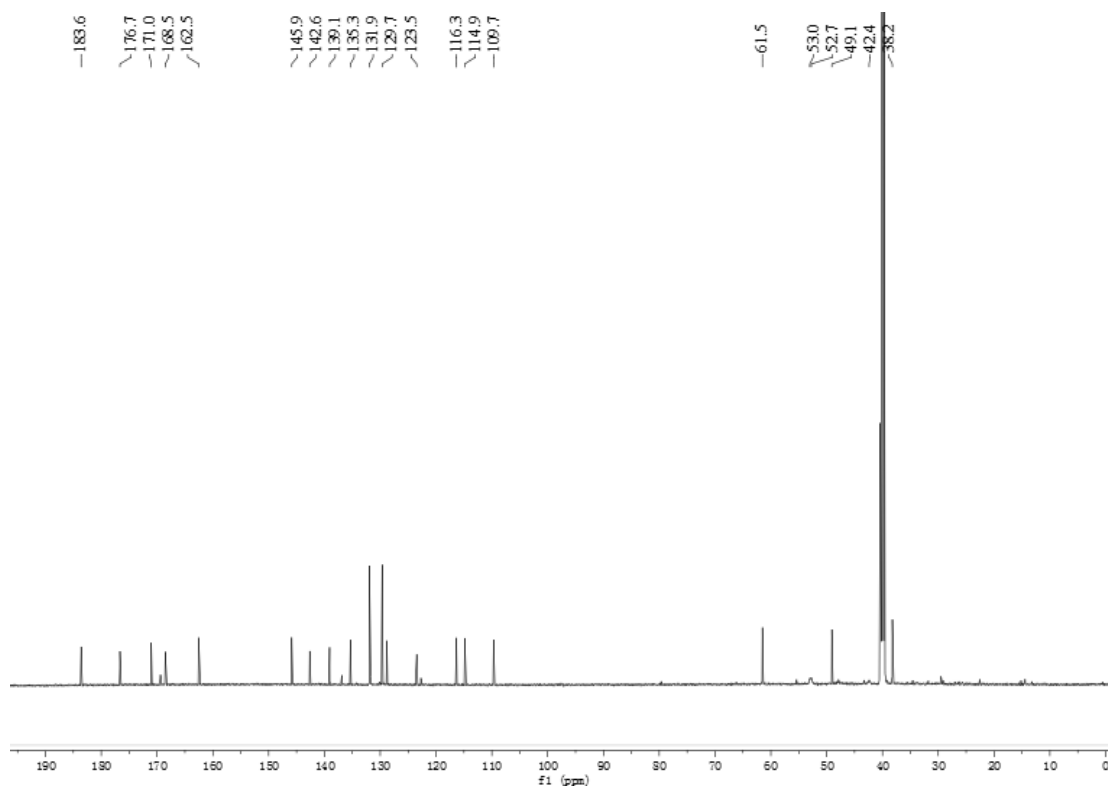

**Figure S70.** The  $^{13}\text{C}$ -NMR (150MHz,  $\text{DMSO-}d_6$ ) spectrum of compound **1k**

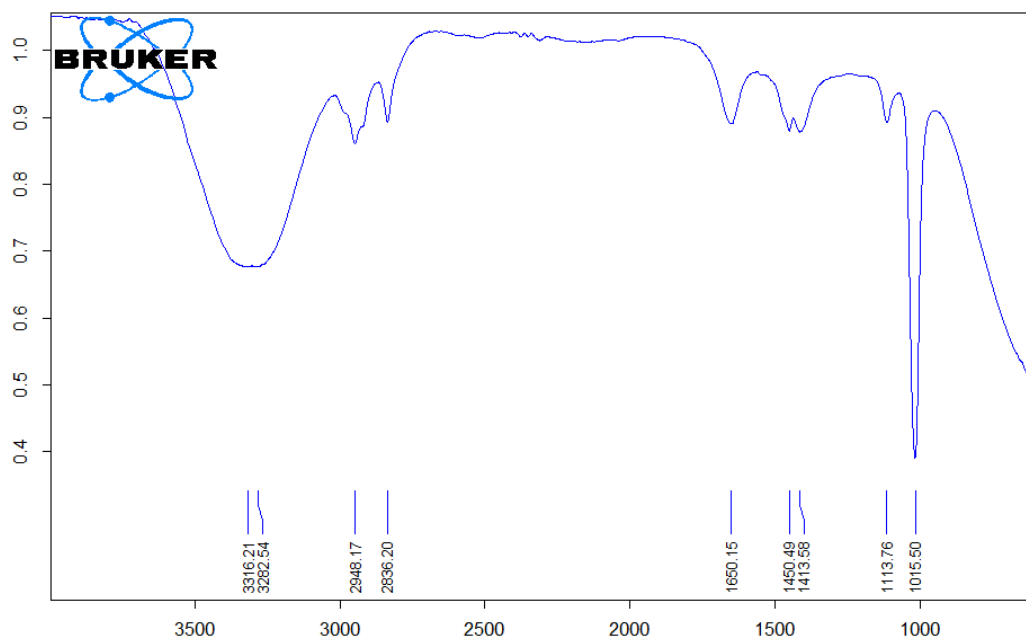

**Figure S71.** The IR spectrum of compound **1k**

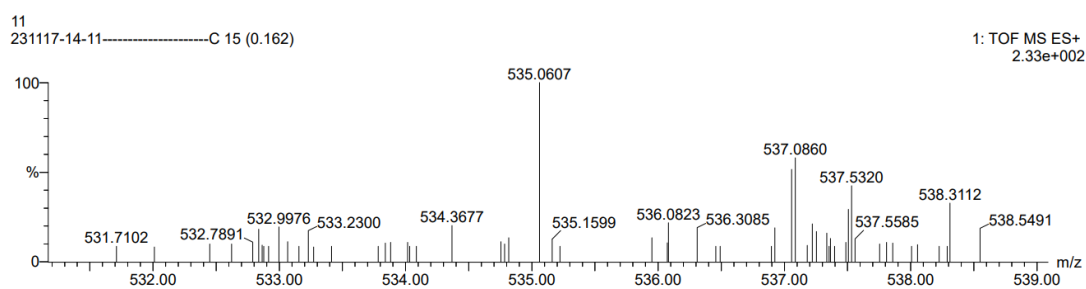

**Figure S72.** The HRESIMS of compound **1k**

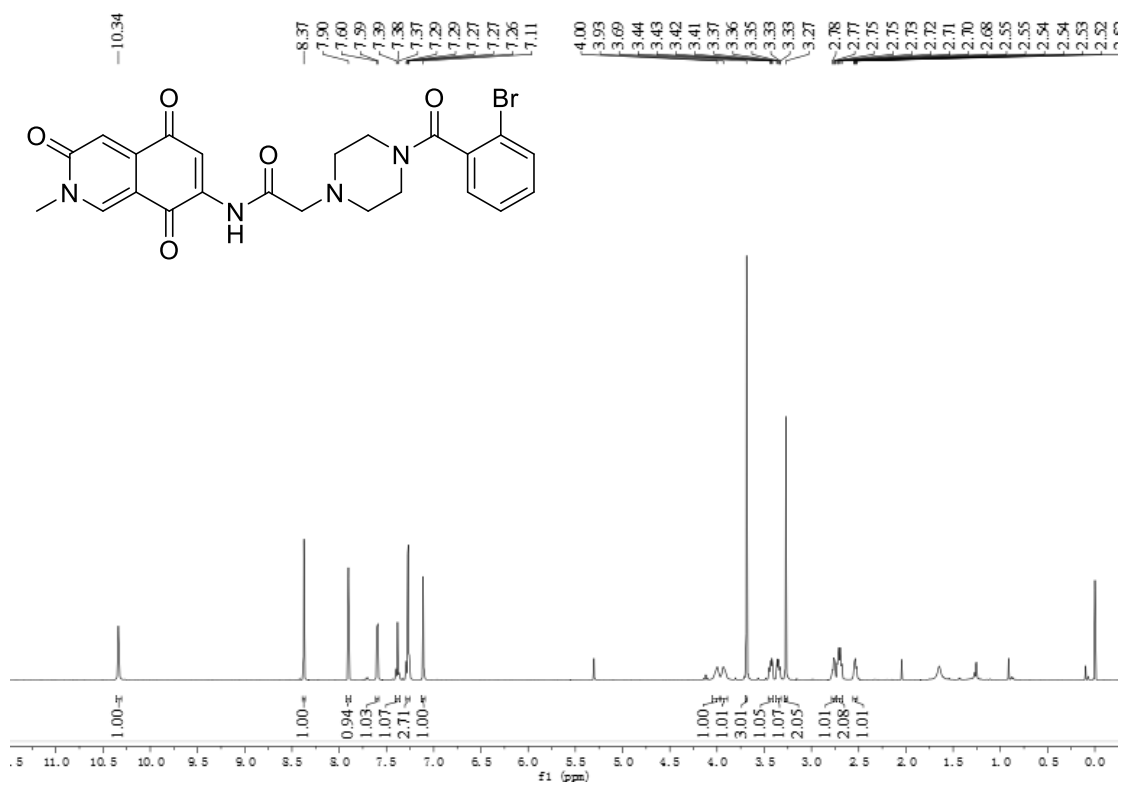

**Figure S73.** The <sup>1</sup>H-NMR (600MHz, CDCl<sub>3</sub>) spectrum of compound **11**

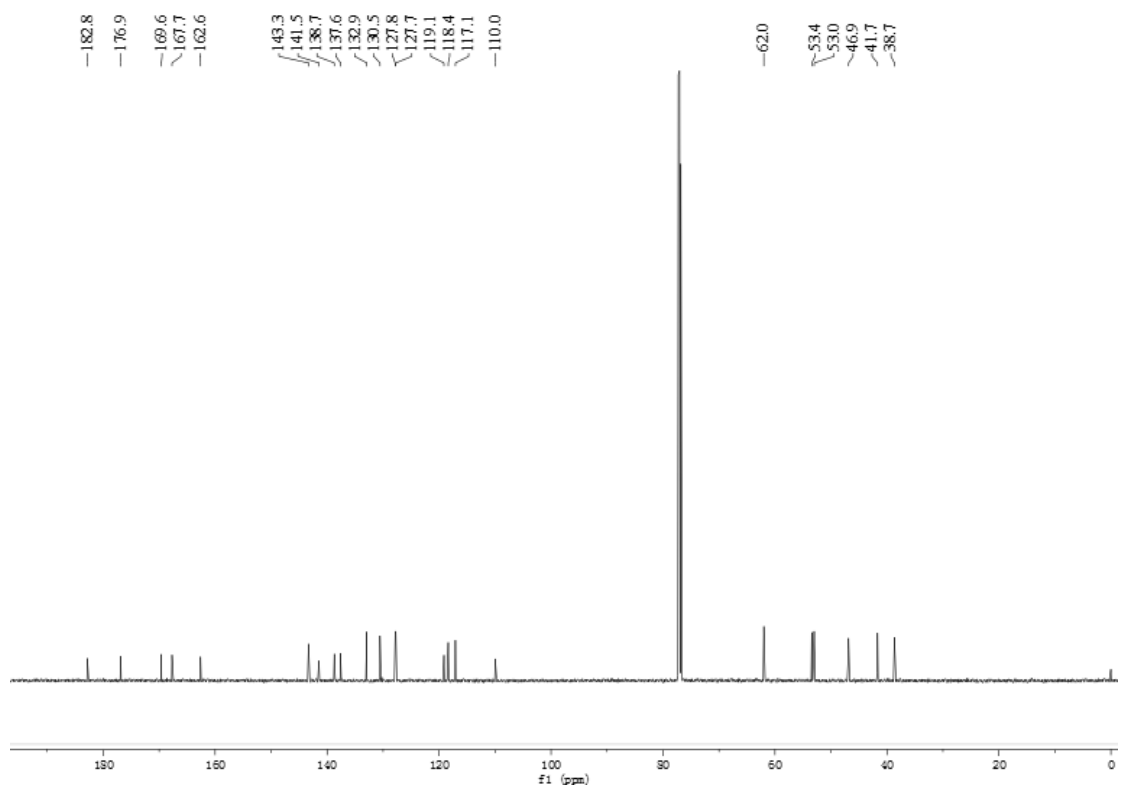

**Figure S74.** The <sup>13</sup>C-NMR (150MHz, CDCl<sub>3</sub>) spectrum of compound **11**

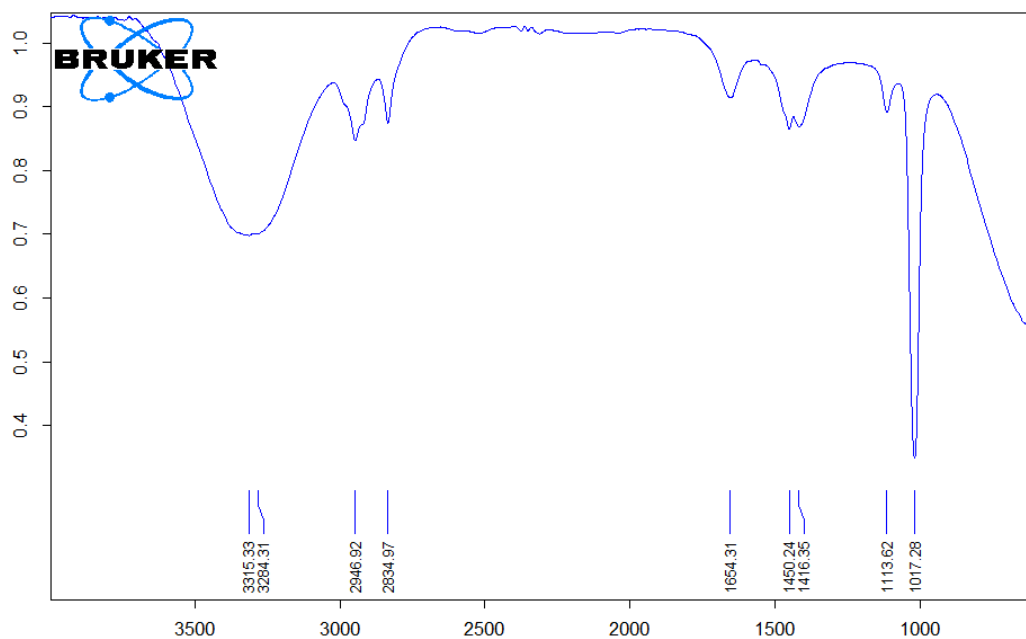

**Figure S75.** The IR spectrum of compound **11**

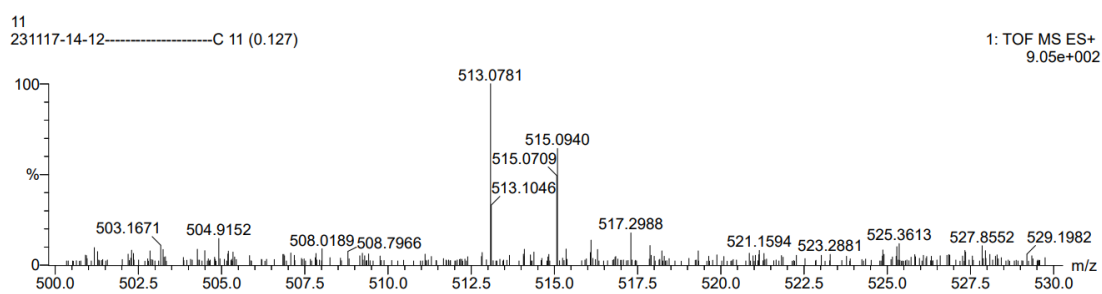

**Figure S76.** The HRESIMS of compound **11**

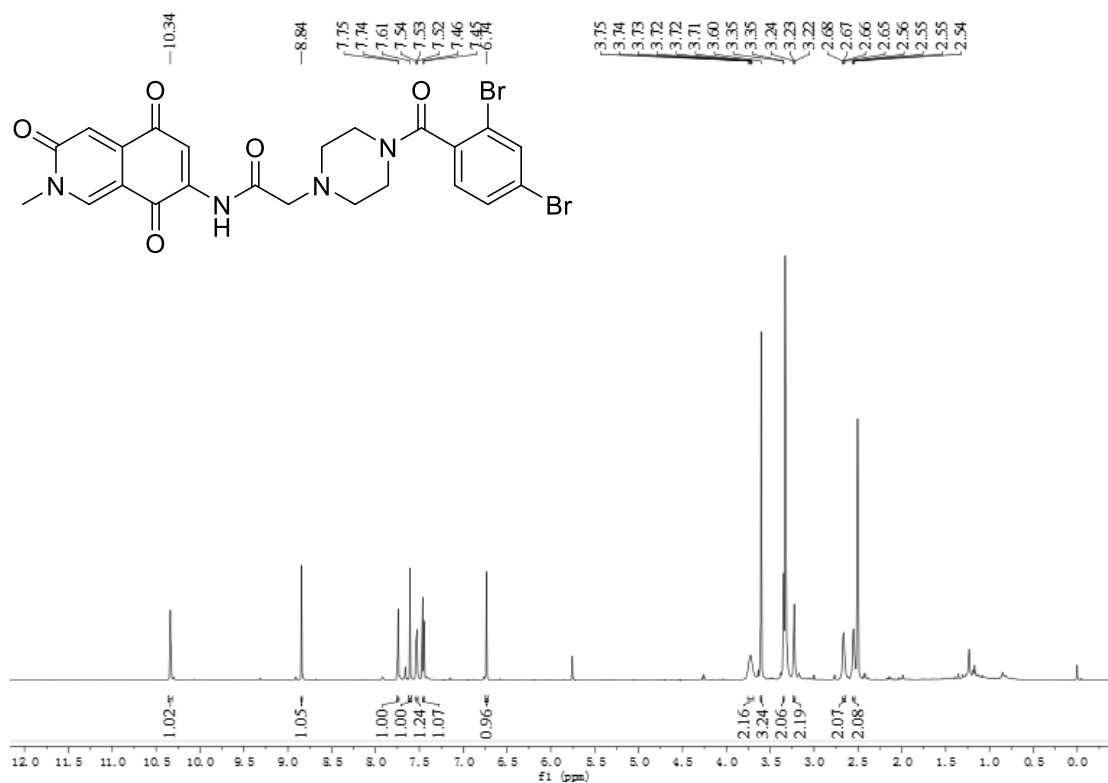

**Figure S77.** The <sup>1</sup>H-NMR (600MHz, DMSO-*d*<sub>6</sub>) spectrum of compound **1m**

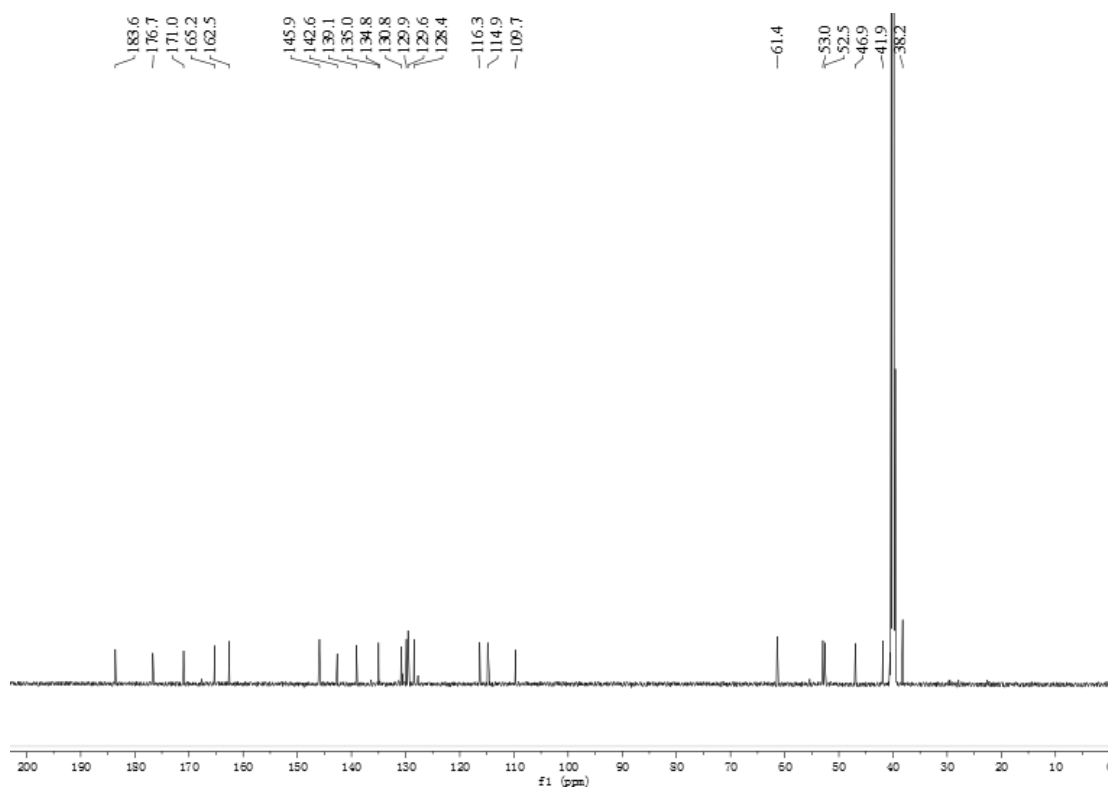

**Figure S78.** The <sup>13</sup>C-NMR (150MHz, DMSO-*d*<sub>6</sub>) spectrum of compound **1m**



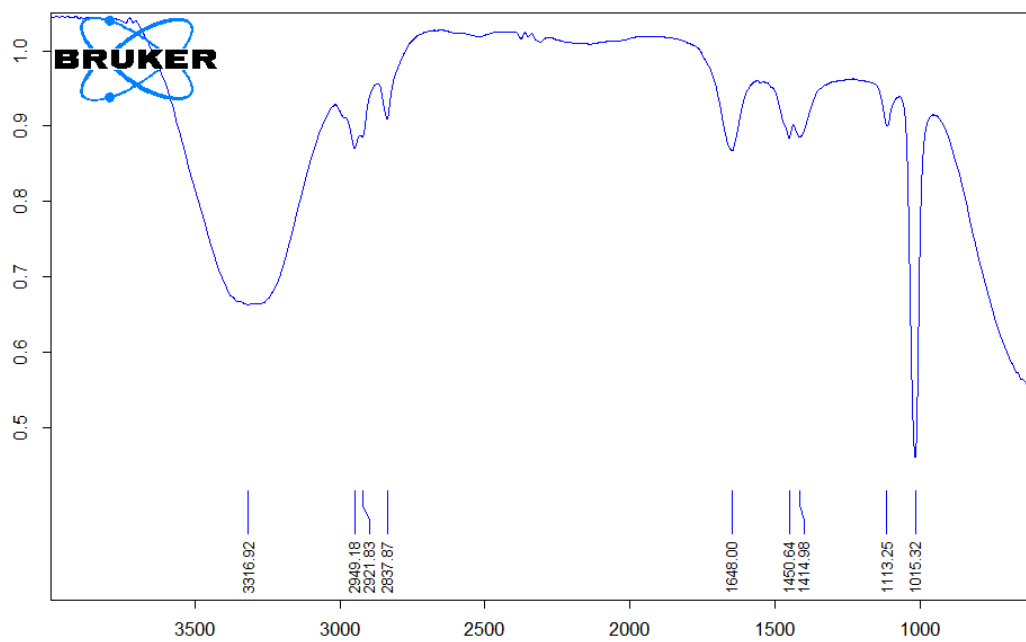

Figure S79. The IR spectrum of compound 1m

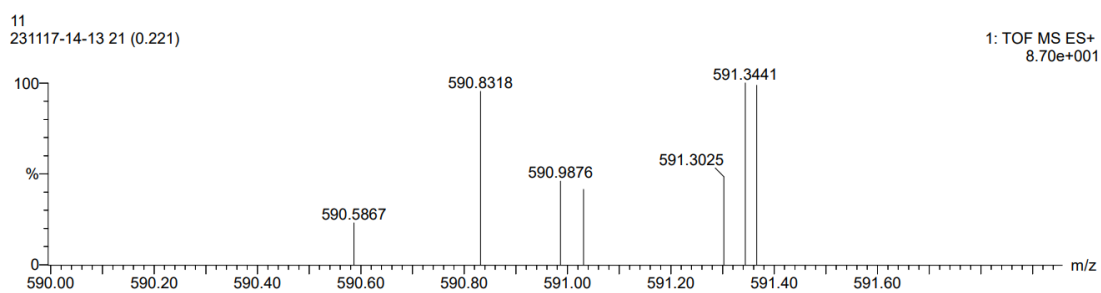

Figure S80. The HRESIMS of compound 1m

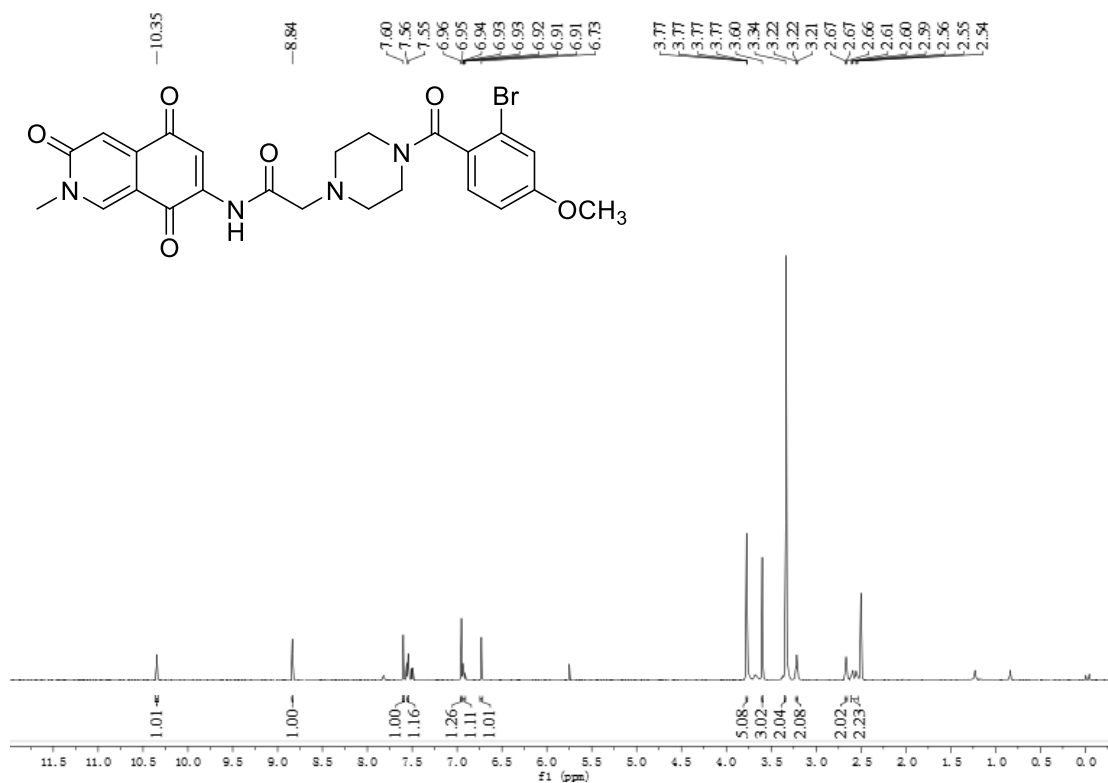

**Figure S81.** The  $^1\text{H-NMR}$  (600MHz,  $\text{DMSO-}d_6$ ) spectrum of compound **1n**

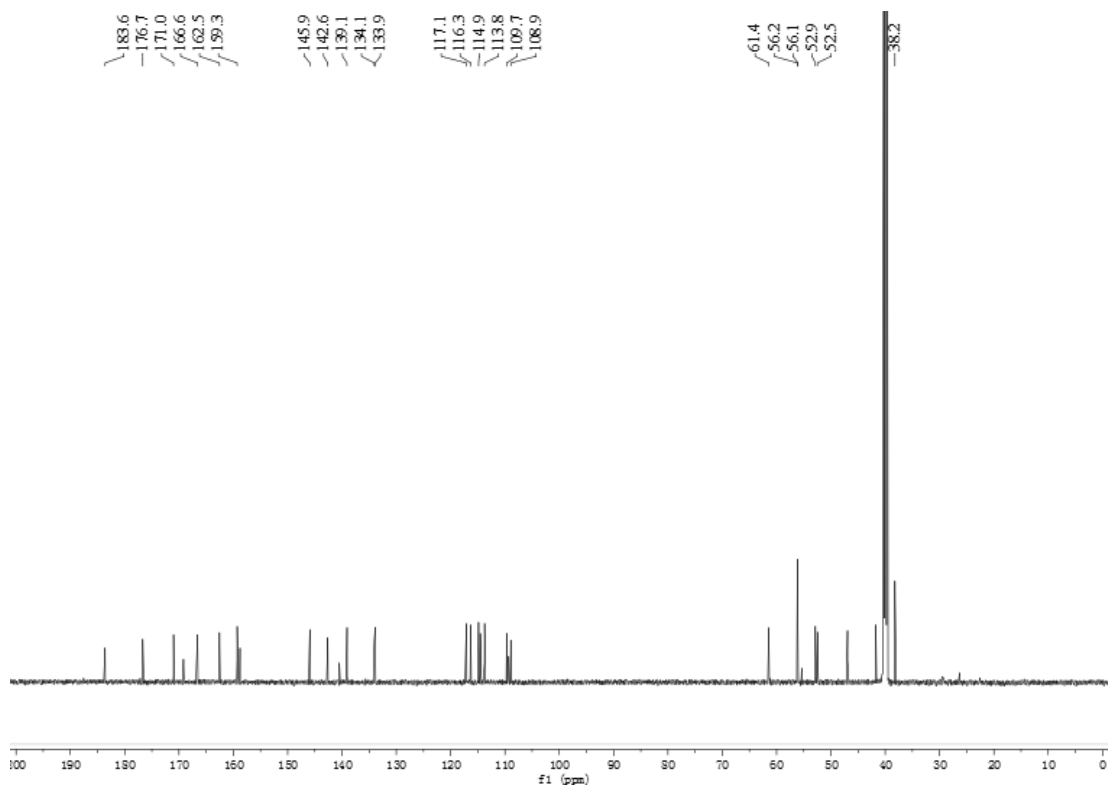

**Figure S82.** The  $^{13}\text{C-NMR}$  (150MHz,  $\text{DMSO-}d_6$ ) spectrum of compound **1n**

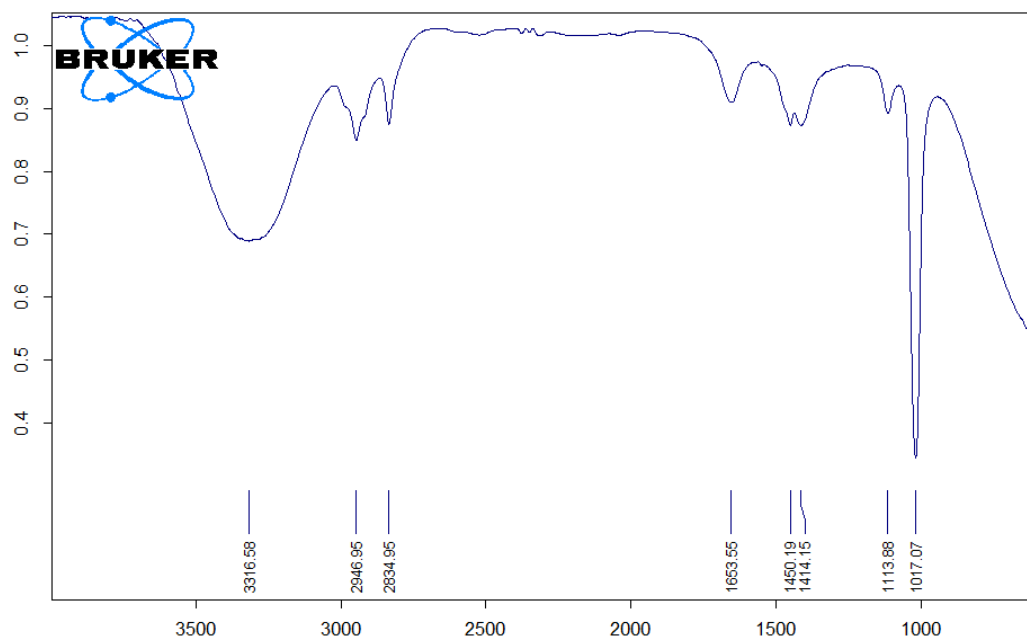

Figure S83. The IR spectrum of compound **1n**

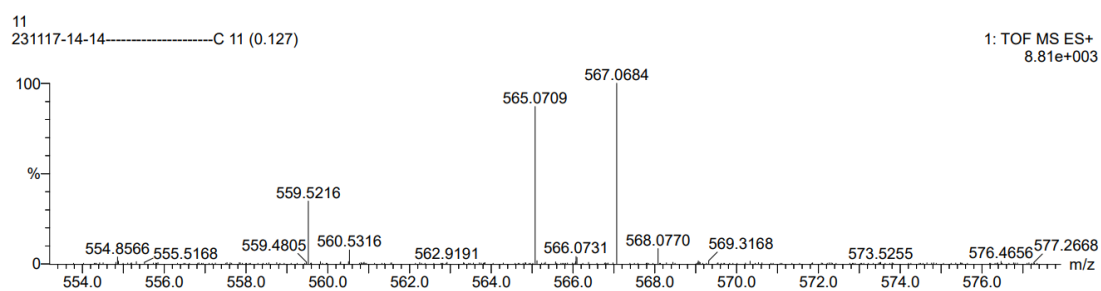

Figure S84. The HRESIMS of compound **1n**

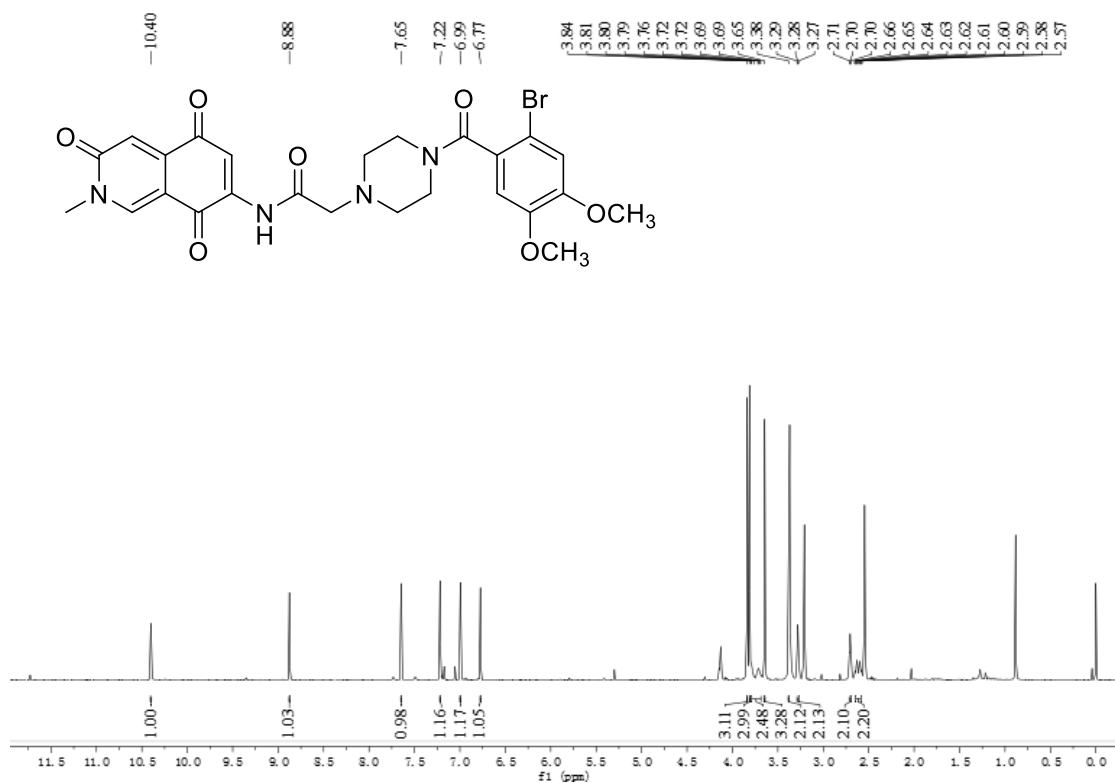

**Figure S85** The  $^1\text{H-NMR}$  (600MHz,  $\text{DMSO-}d_6$ ) spectrum of compound **1o**

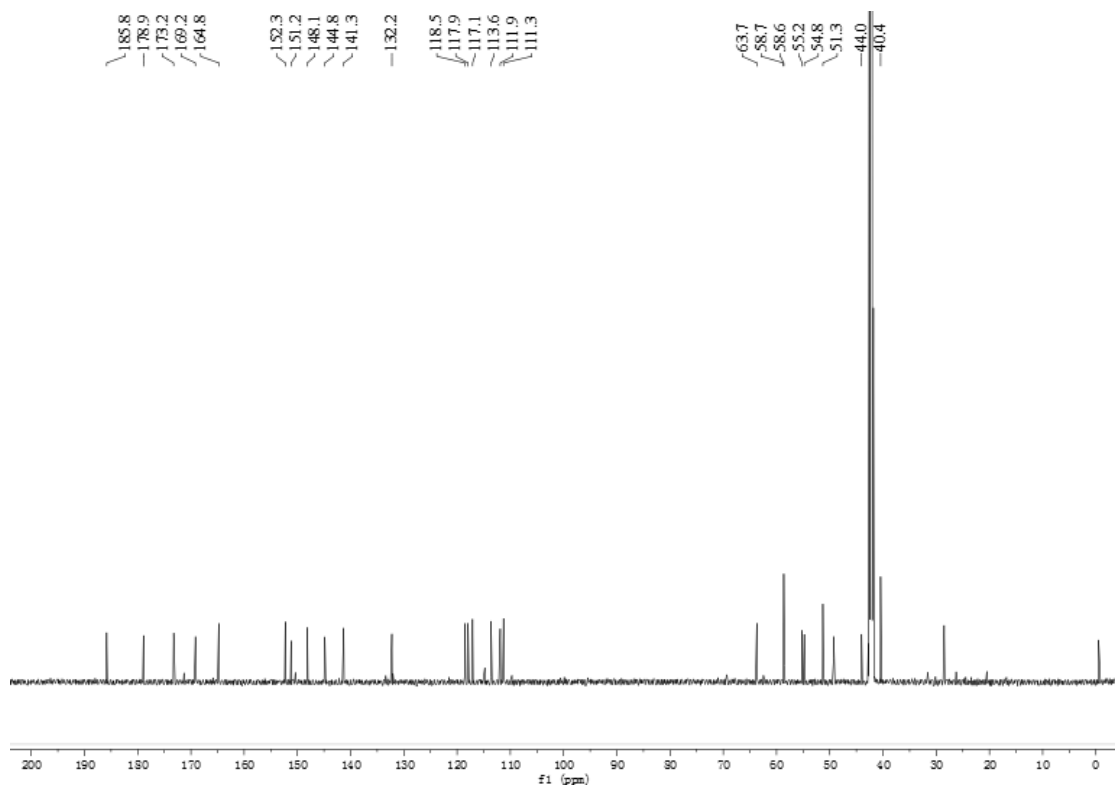

**Figure S86.** The  $^{13}\text{C-NMR}$  (150MHz,  $\text{DMSO-}d_6$ ) spectrum of compound **1o**

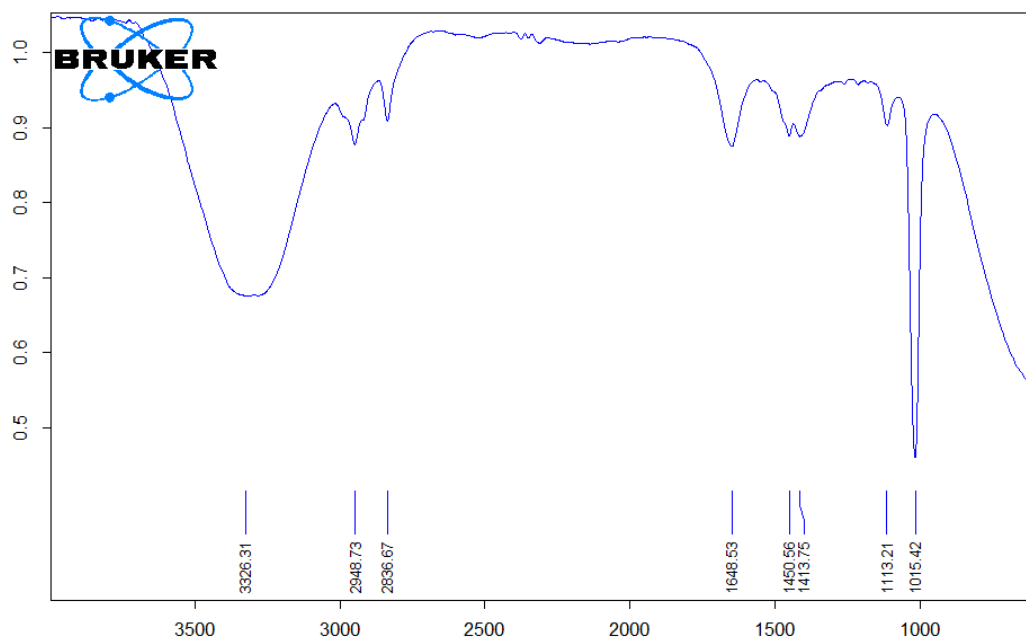

Figure S87. The IR spectrum of compound **10**

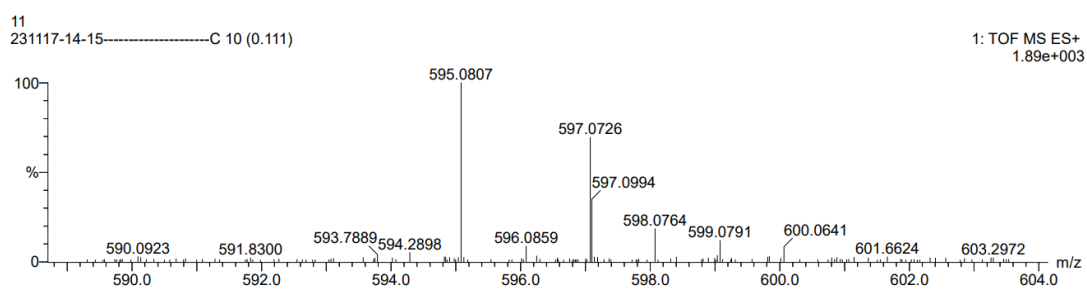

Figure S88. The HRESIMS of compound **10**

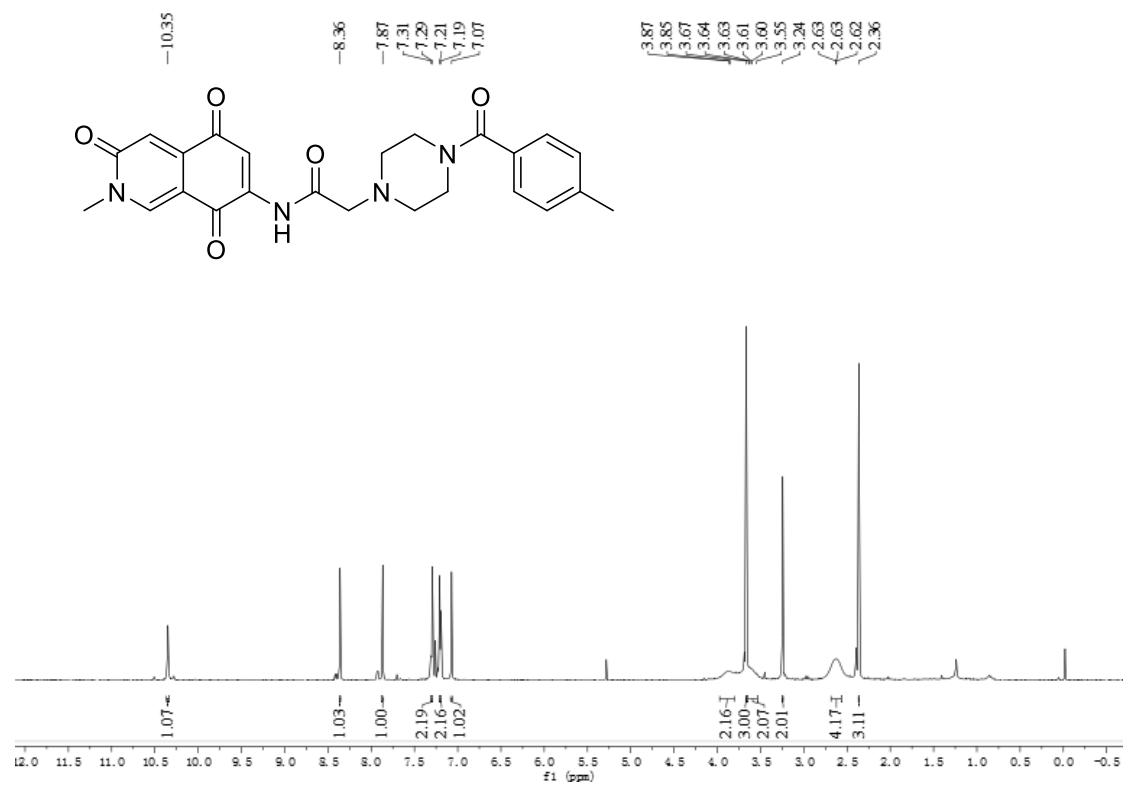

**Figure S89.** The <sup>1</sup>H-NMR (600MHz, CDCl<sub>3</sub>) spectrum of compound **1p**

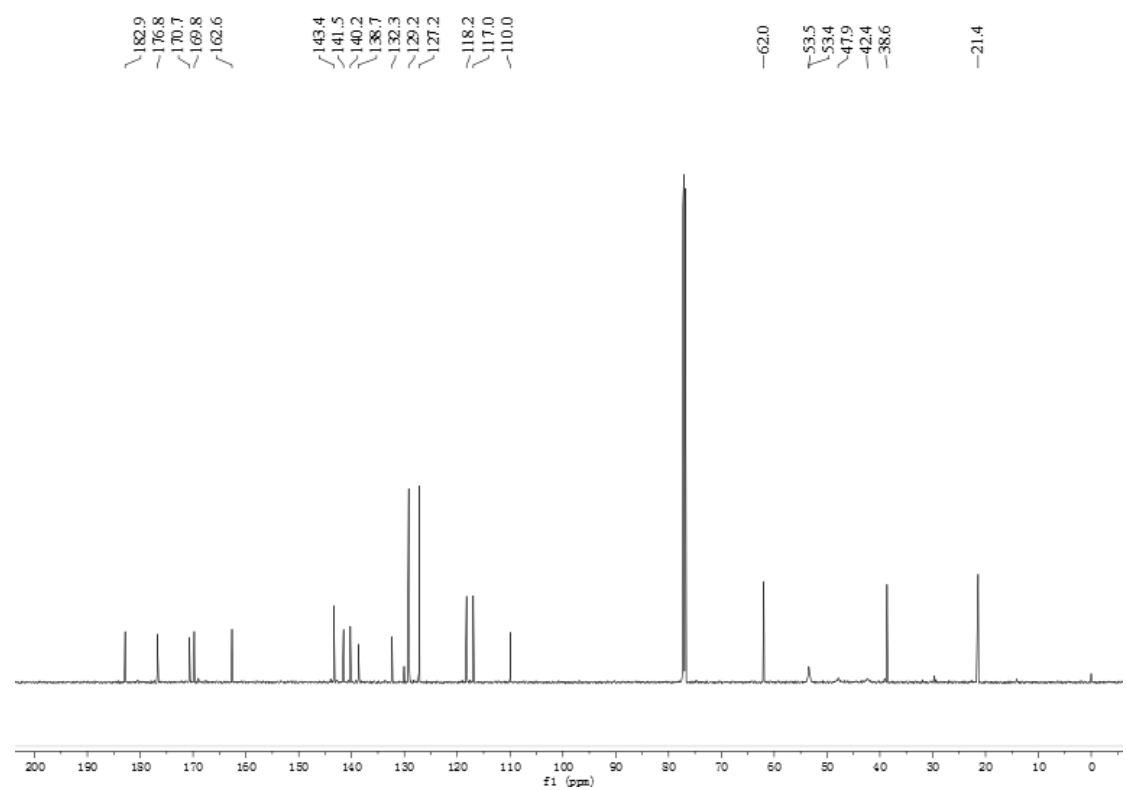

**Figure S90.** The <sup>13</sup>C-NMR (150MHz, CDCl<sub>3</sub>) spectrum of compound **1p**

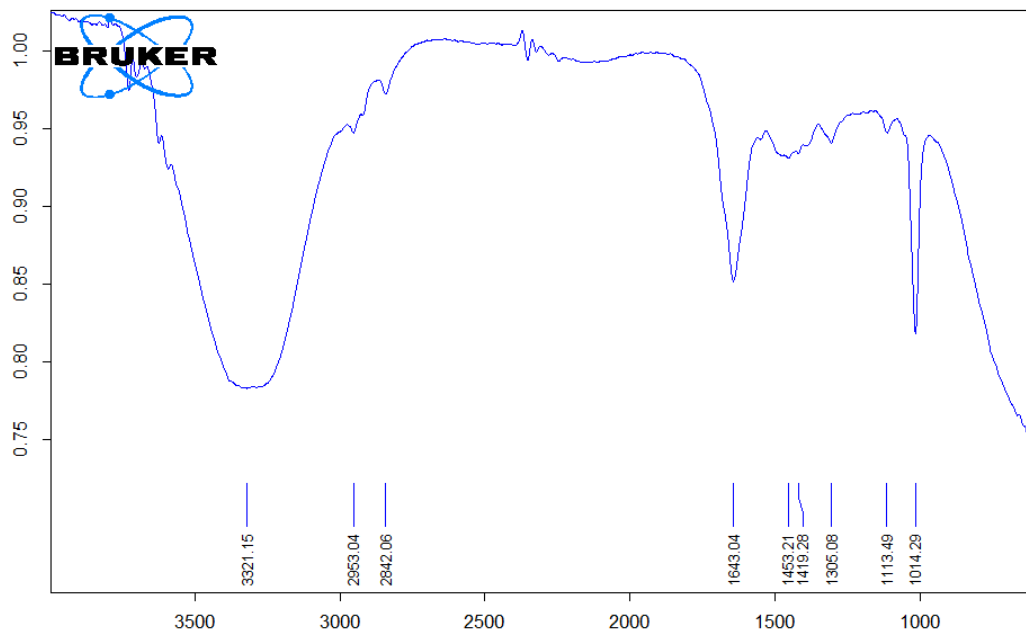

**Figure S91.** The IR spectrum of compound **1p**

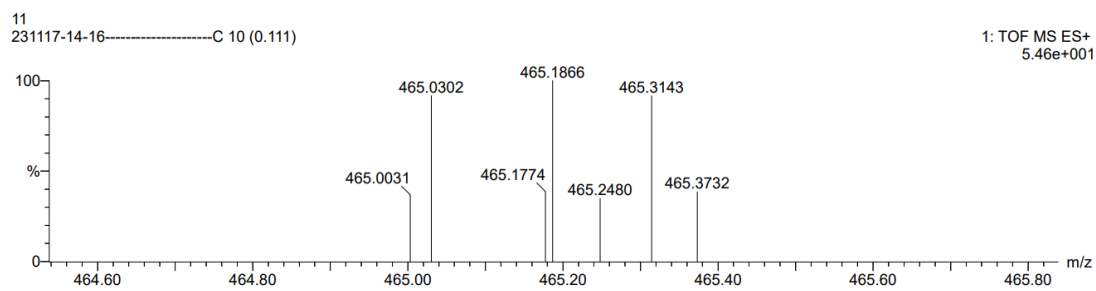

**Figure S92.** The HRESIMS of compound **1p**

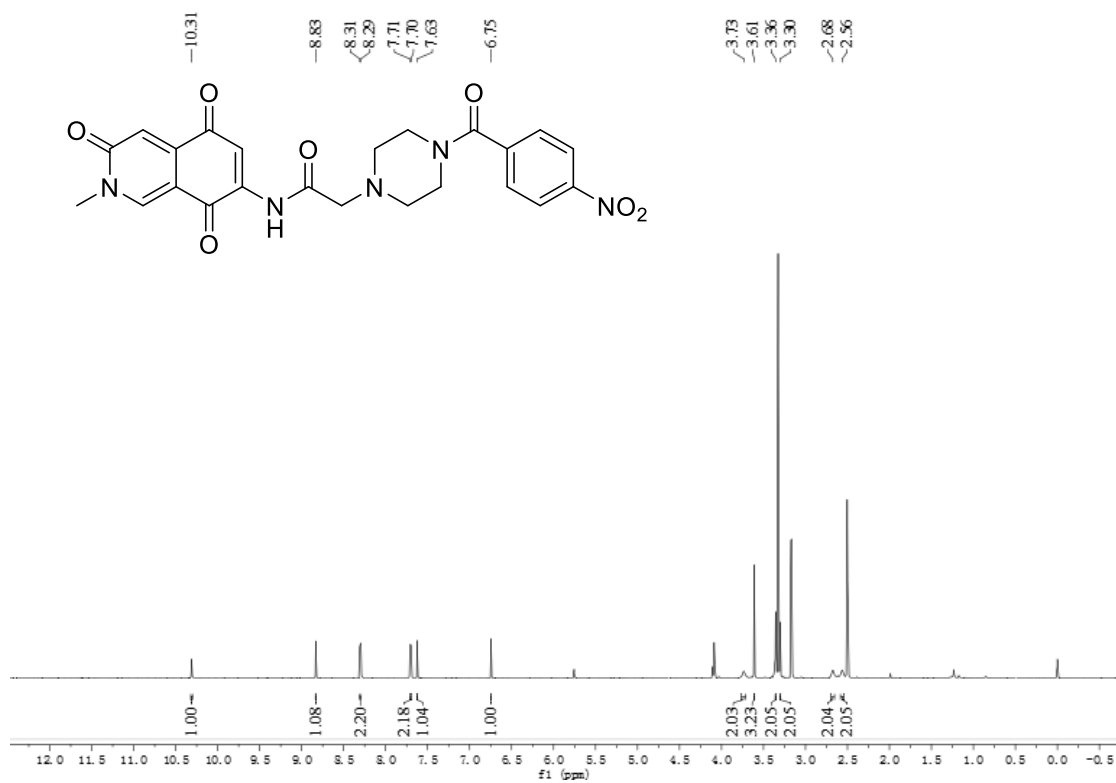

**Figure S93.** The <sup>1</sup>H-NMR (600MHz, DMSO-*d*<sub>6</sub>) spectrum of compound **1q**

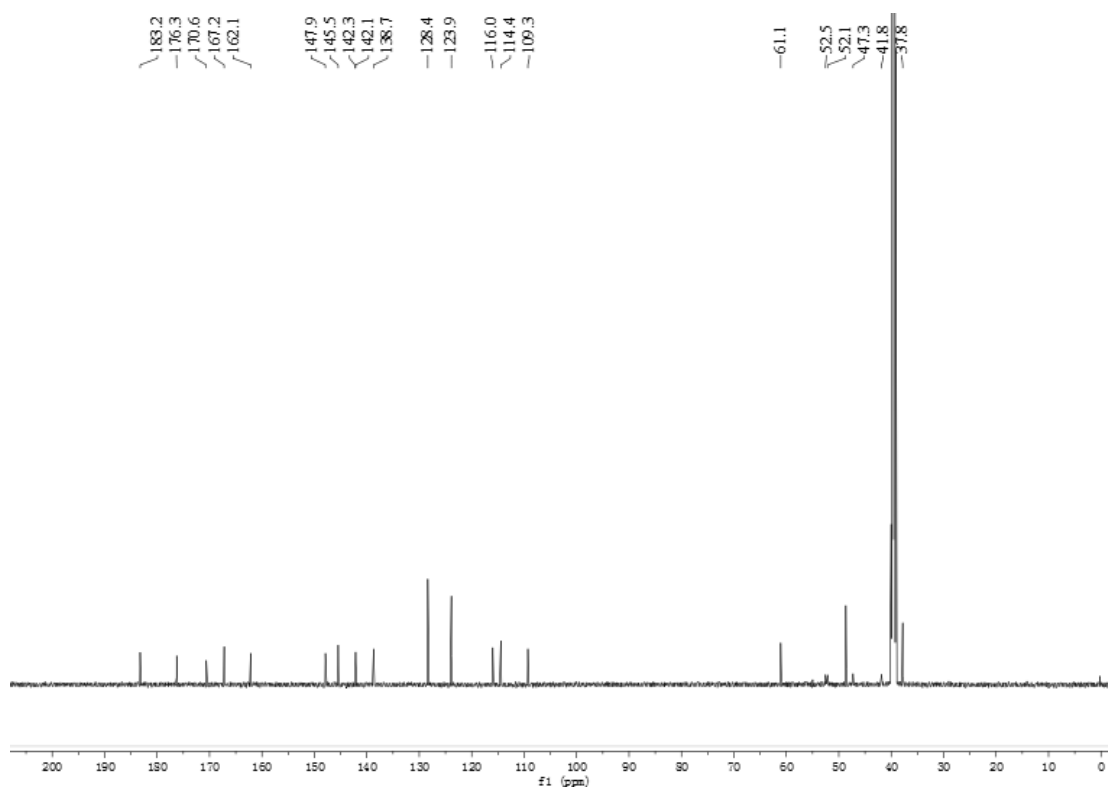

**Figure S94.** The <sup>13</sup>C-NMR (150MHz, DMSO-*d*<sub>6</sub>) spectrum of compound **1q**



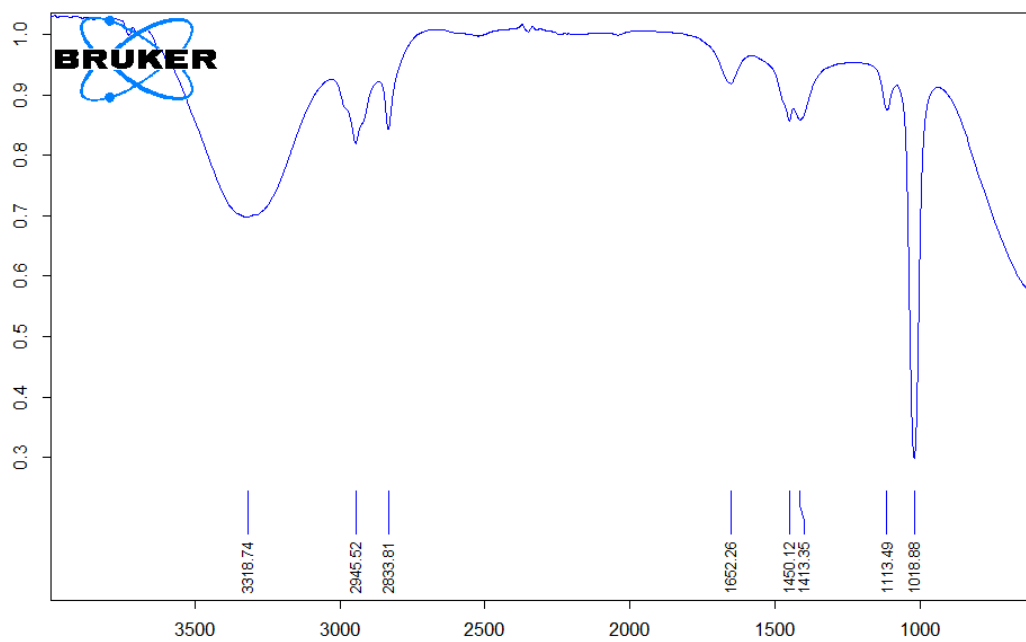

Figure S95. The IR spectrum of compound **1q**

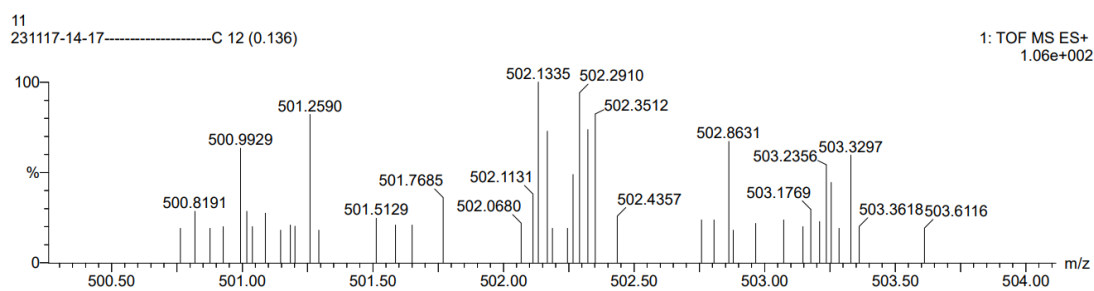

Figure S96. The HRMS of compound **1q**

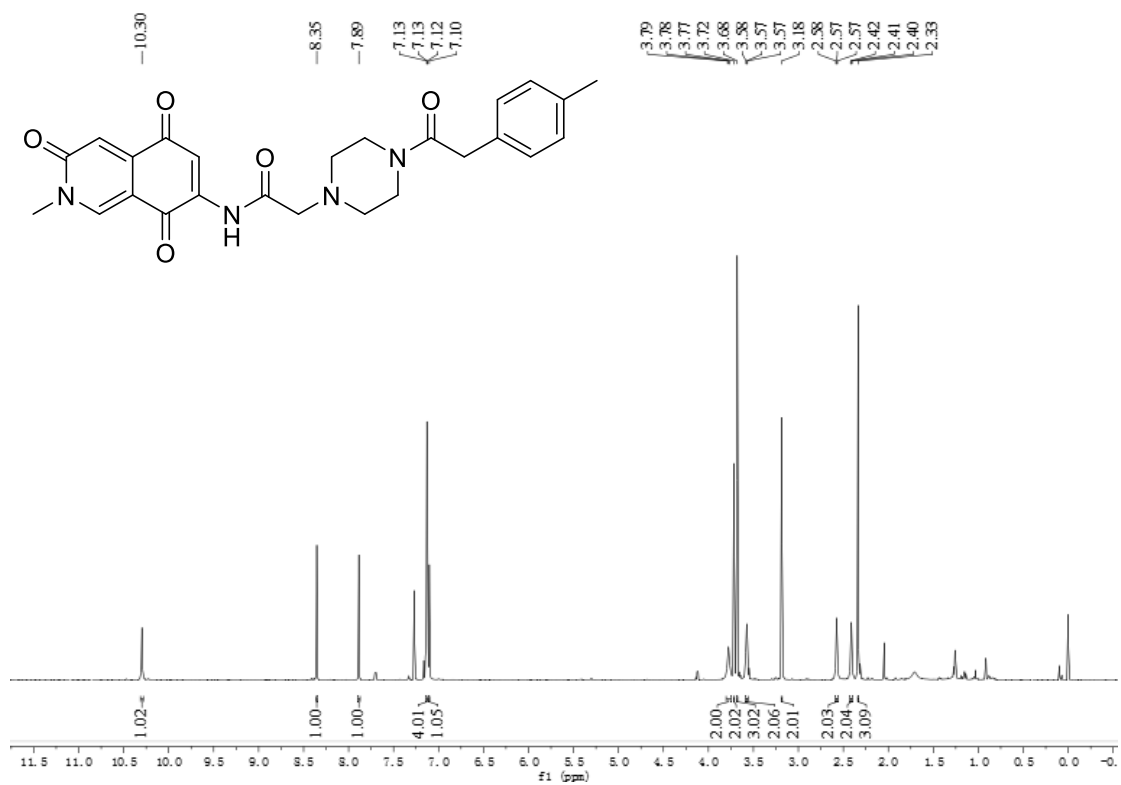

**Figure S97.** The <sup>1</sup>H-NMR (600MHz, CDCl<sub>3</sub>) spectrum of compound **1r**

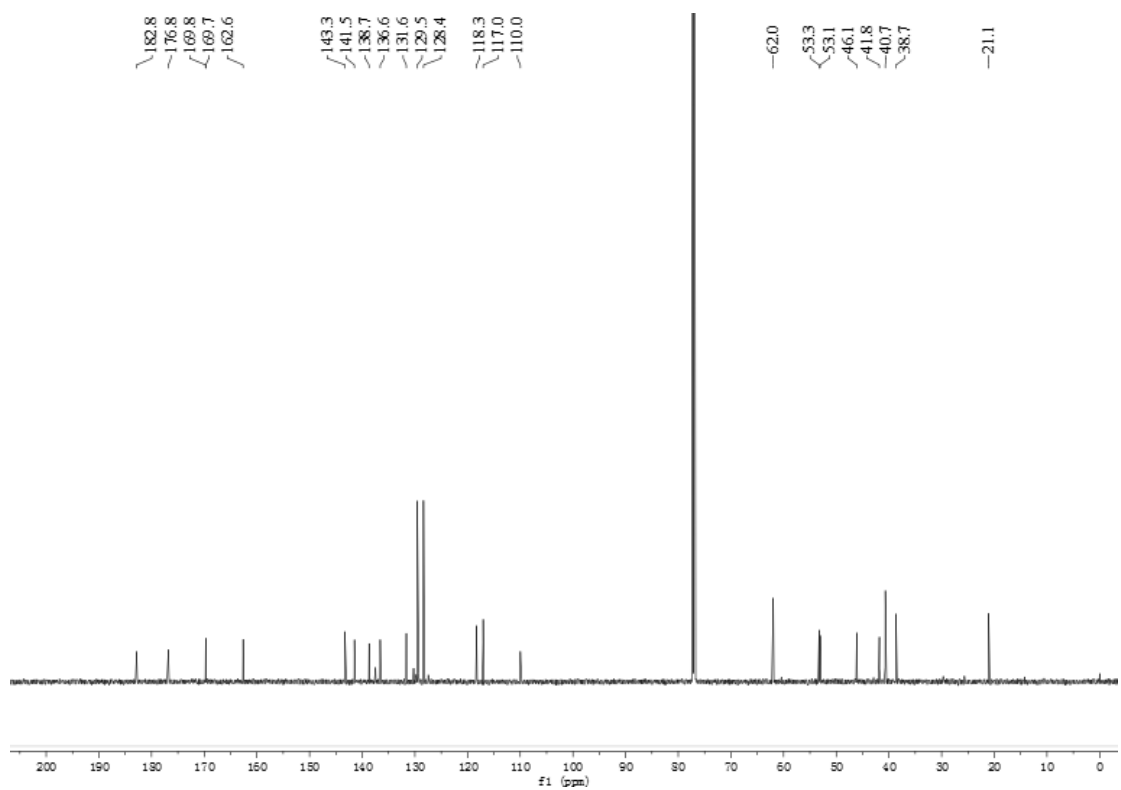

**Figure S98.** The <sup>13</sup>C-NMR (150MHz, CDCl<sub>3</sub>) spectrum of compound **1r**

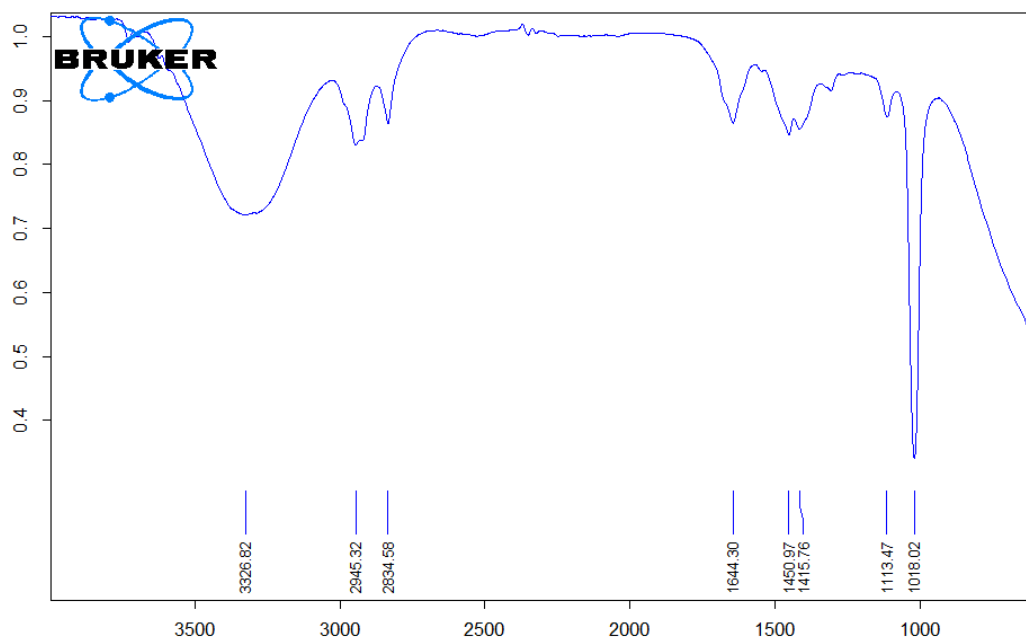

Figure S99. The IR spectrum of compound **1r**

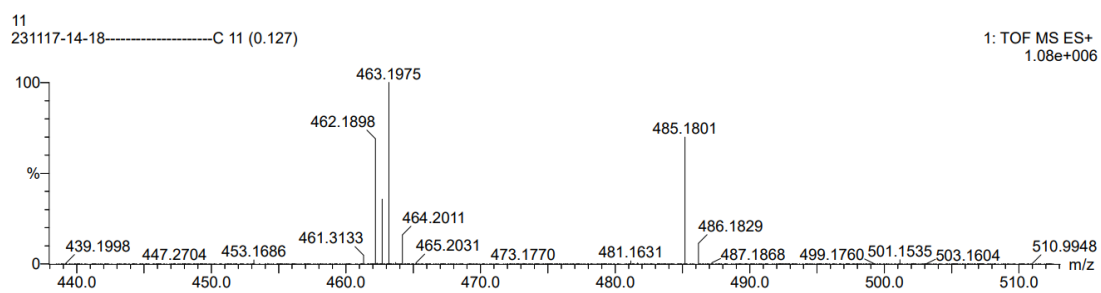

Figure S100. The HRESIMS of compound **1r**

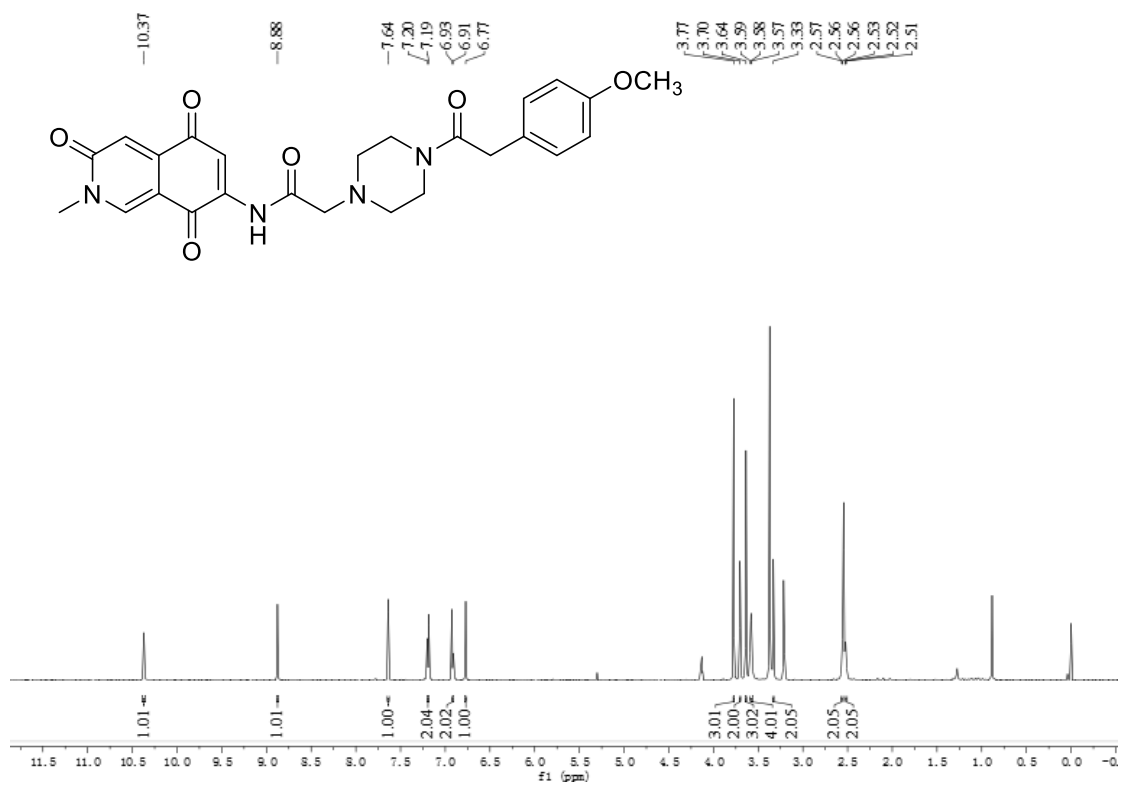

**Figure S101.** The  $^1\text{H-NMR}$  (600MHz,  $\text{DMSO-}d_6$ ) spectrum of compound **1s**

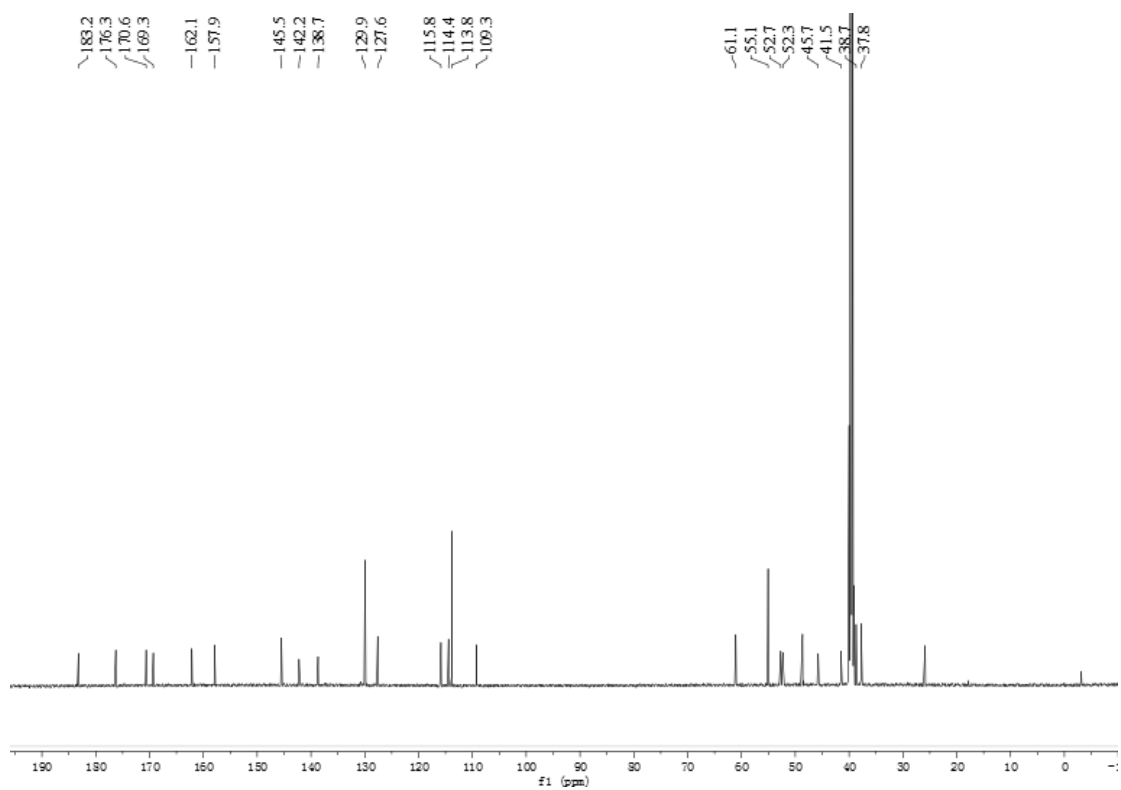

**Figure S102.** The  $^{13}\text{C-NMR}$  (150MHz,  $\text{DMSO-}d_6$ ) spectrum of compound **1s**

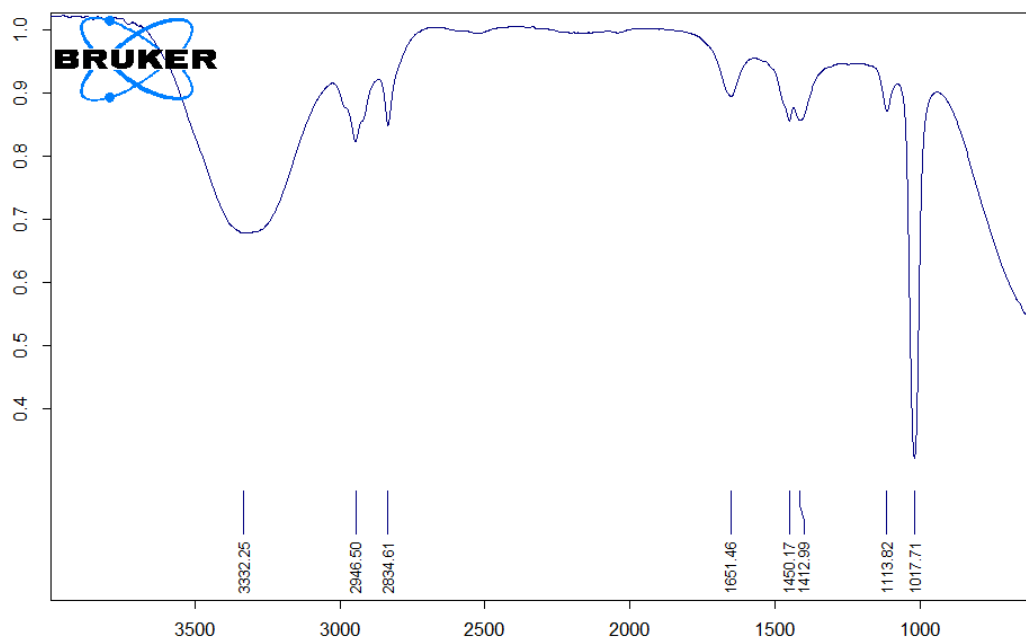

**Figure S103.** The IR spectrum of compound **1s**

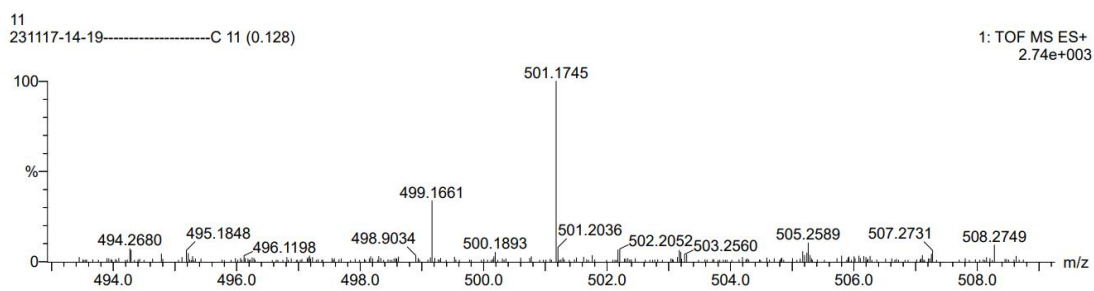

**Figure S104.** The HRESIMS of compound **1s**

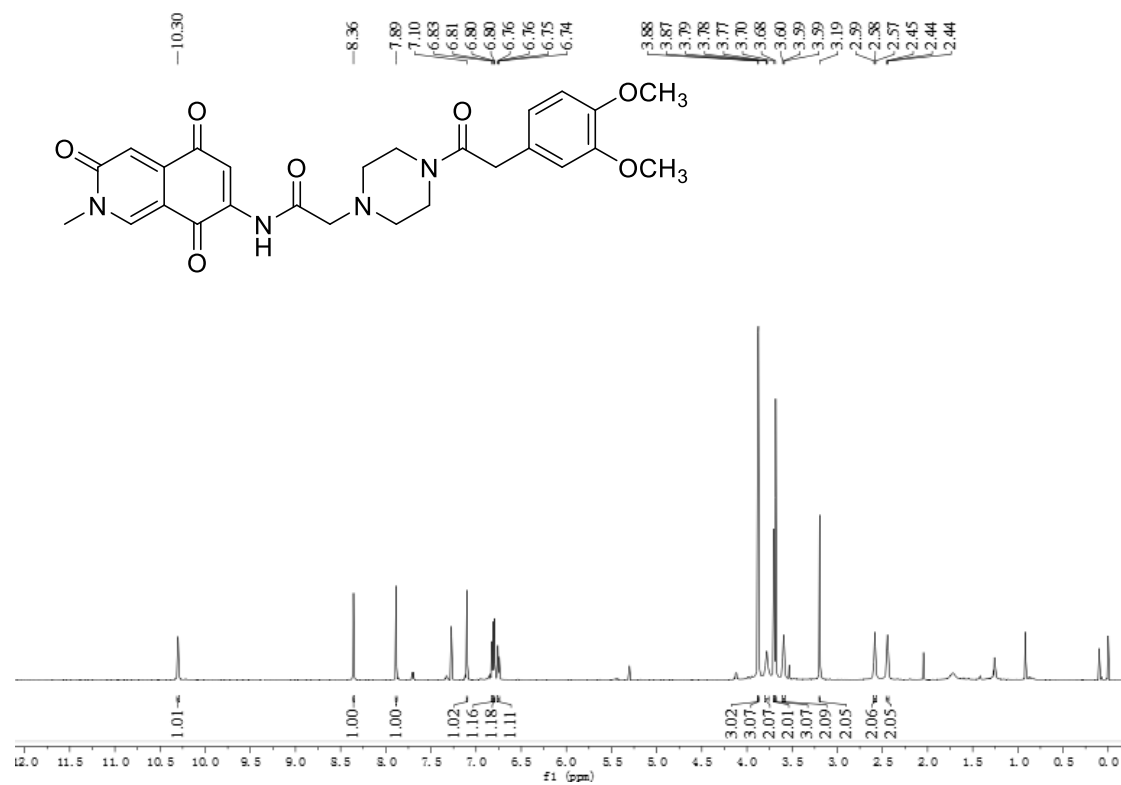

**Figure S105.** The  $^1\text{H-NMR}$  (600MHz,  $\text{CDCl}_3$ ) spectrum of compound **1t**

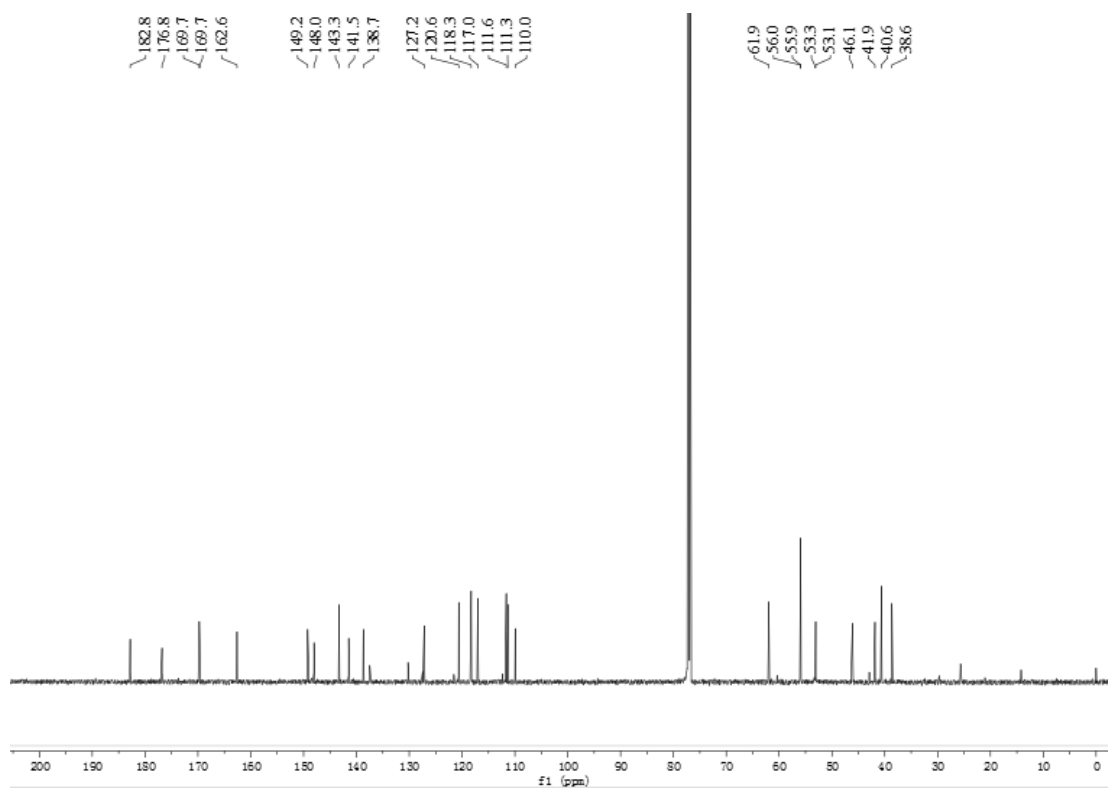

**Figure S106.** The  $^{13}\text{C-NMR}$  (150MHz,  $\text{CDCl}_3$ ) spectrum of compound **1t**

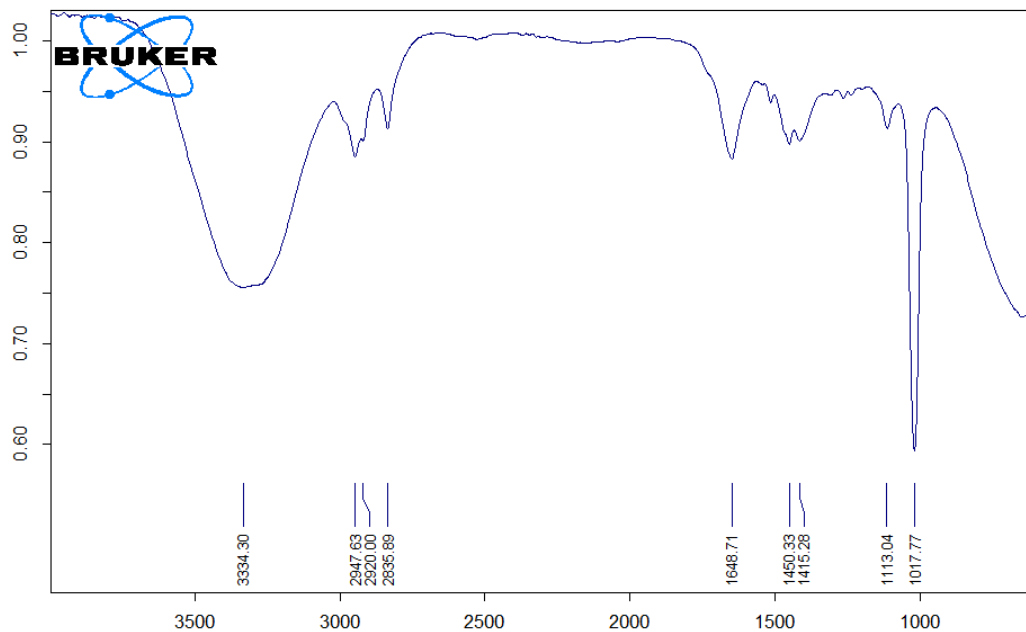

**Figure S107.** The IR spectrum of compound **1t**

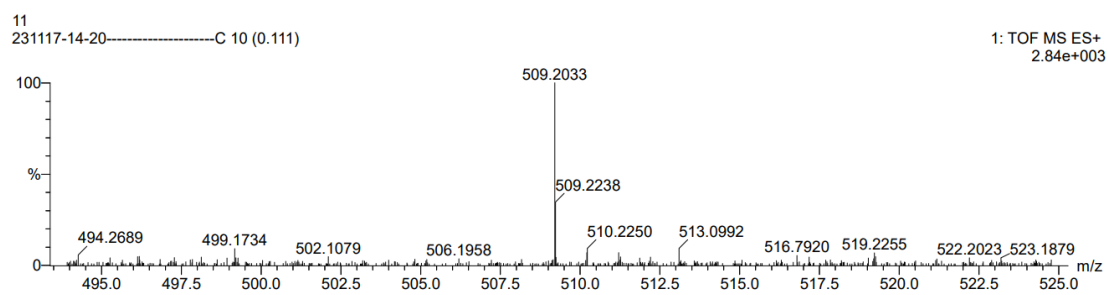

**Figure S108.** The HRESIMS of compound **1t**

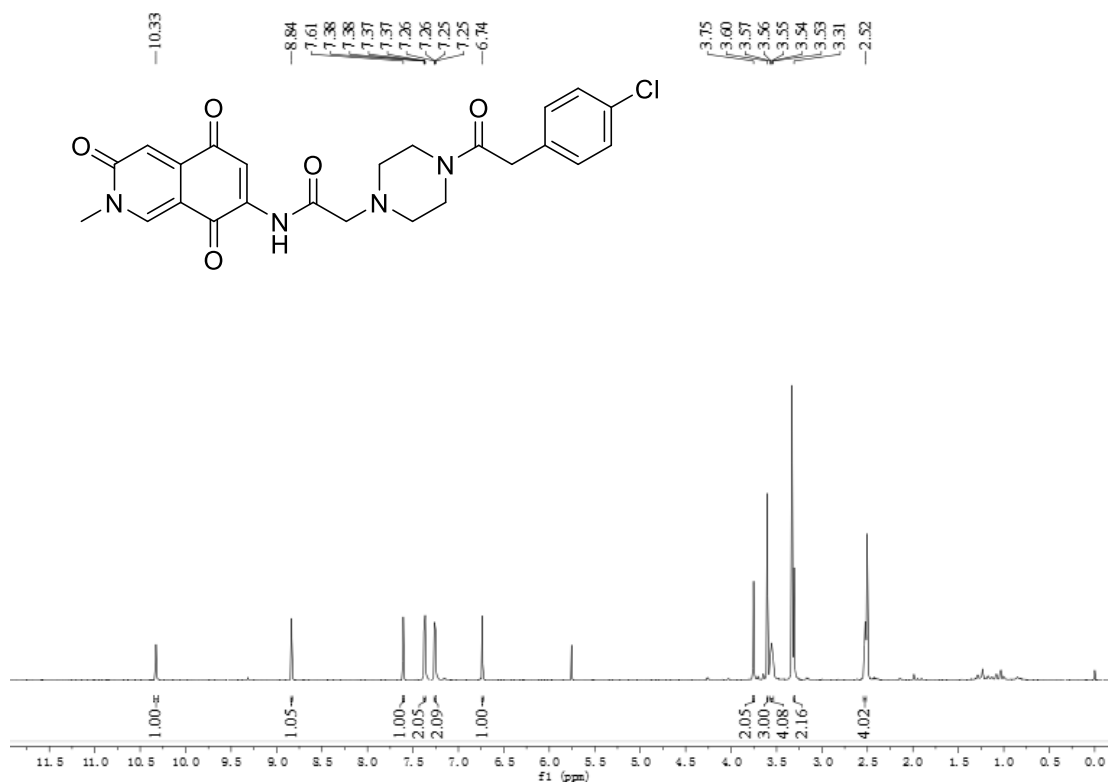

**Figure S109.** The  $^1\text{H-NMR}$  (600MHz,  $\text{DMSO-}d_6$ ) spectrum of compound **1u**

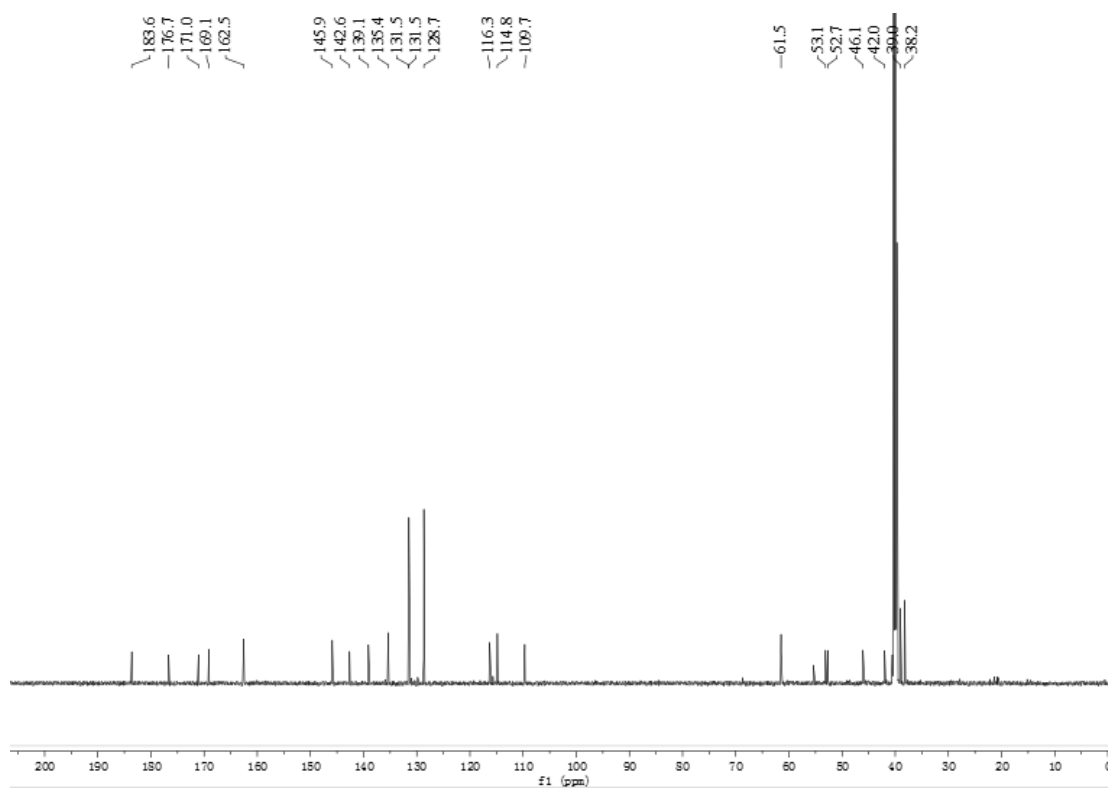

**Figure S110.** The  $^{13}\text{C-NMR}$  (150MHz,  $\text{DMSO-}d_6$ ) spectrum of compound **1u**



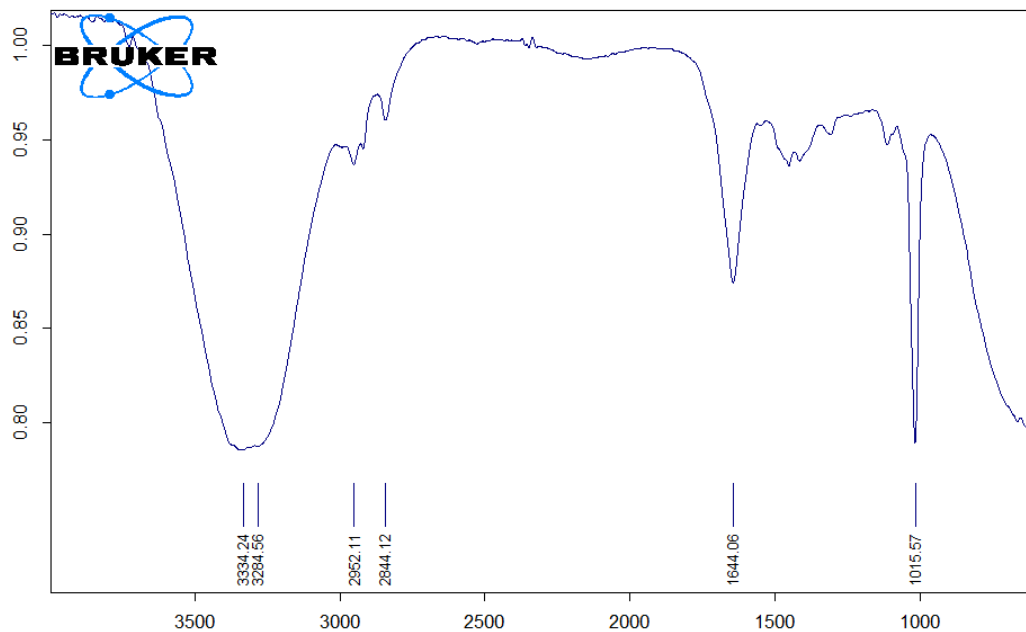

**Figure S111.** The IR spectrum of compound **1u**

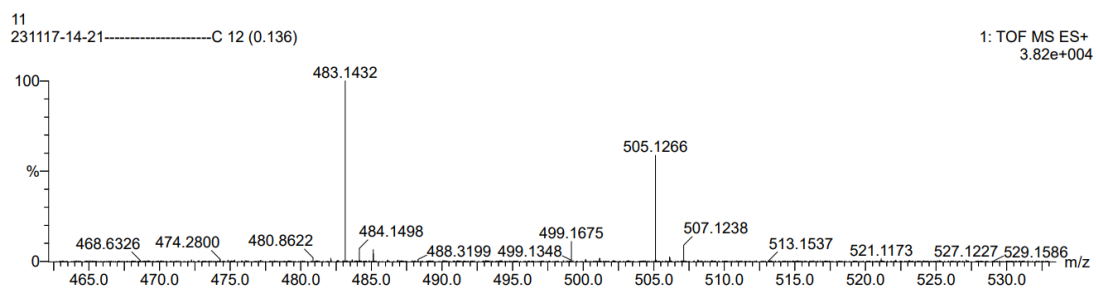

**Figure S112.** The HRESIMS of compound **1u**

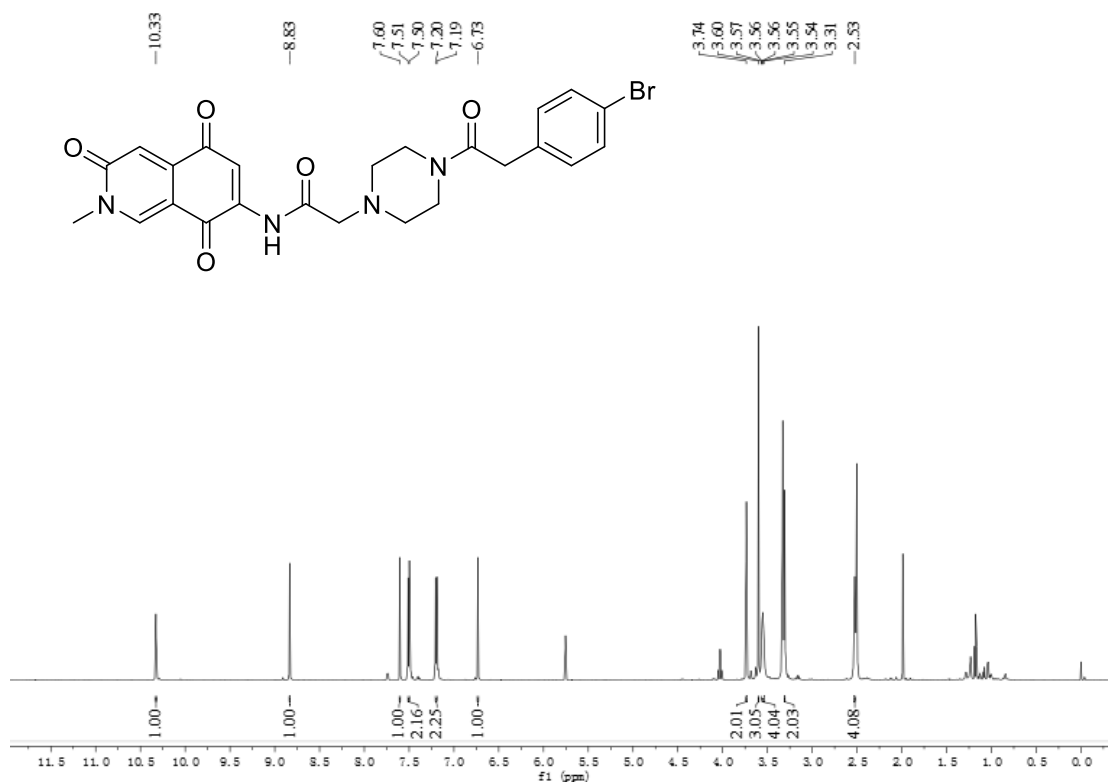

**Figure S113.** The  $^1\text{H-NMR}$  (600MHz,  $\text{DMSO-}d_6$ ) spectrum of compound **1v**

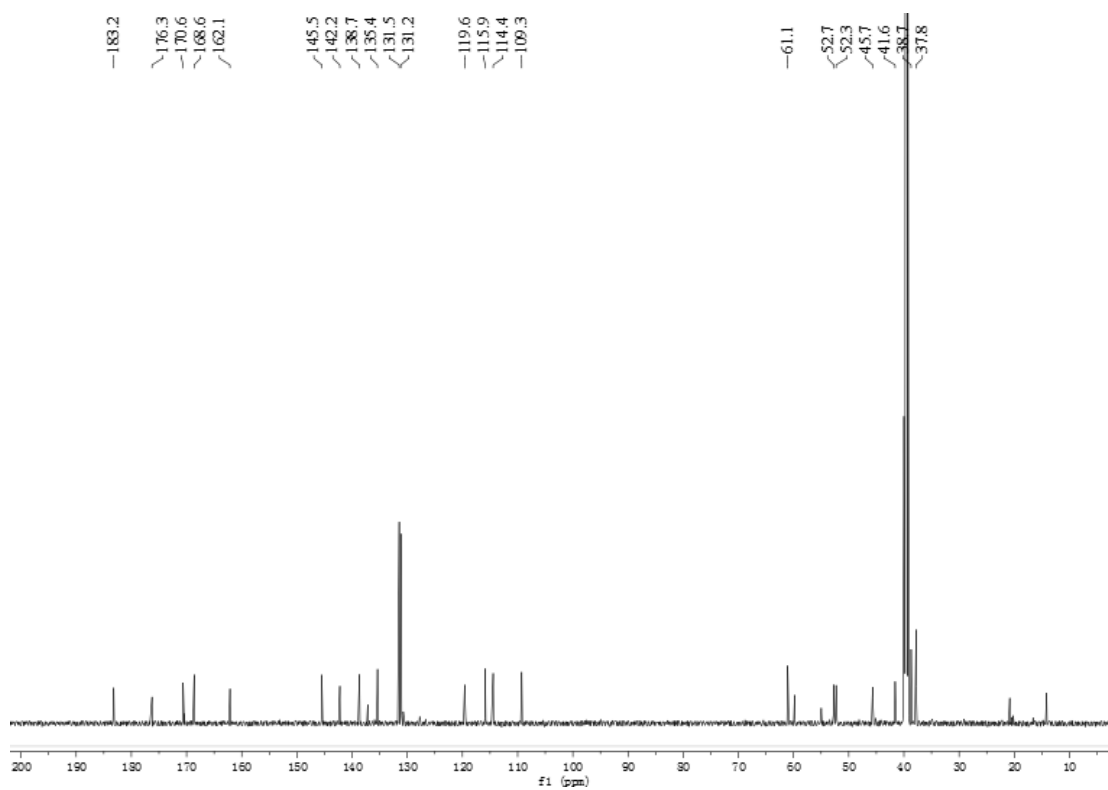

**Figure S114.** The  $^{13}\text{C-NMR}$  (150MHz,  $\text{DMSO-}d_6$ ) spectrum of compound **1v**

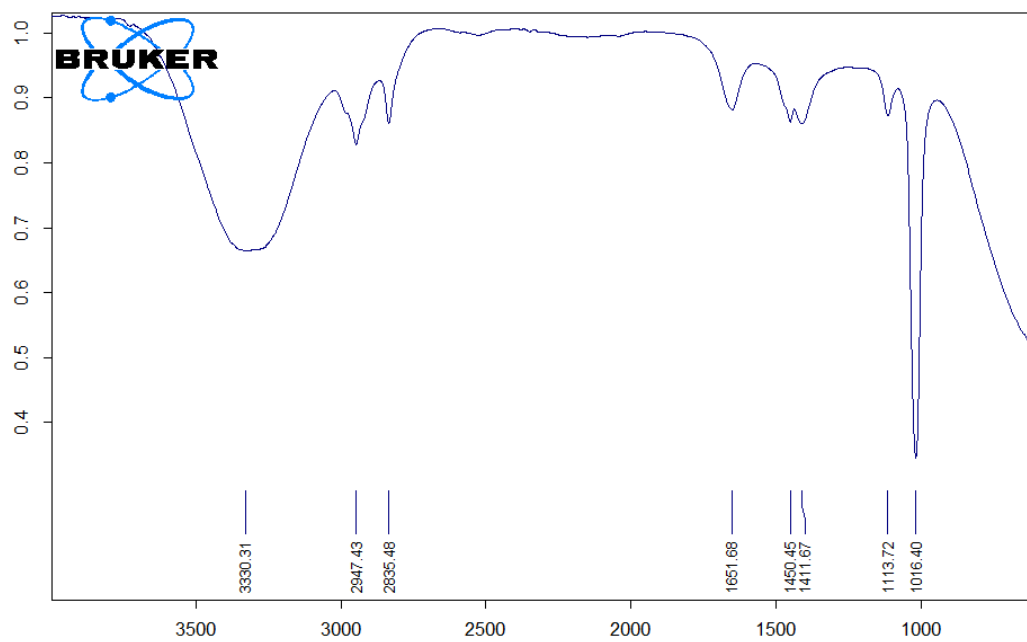

**Figure S115.** The IR spectrum of compound **1v**

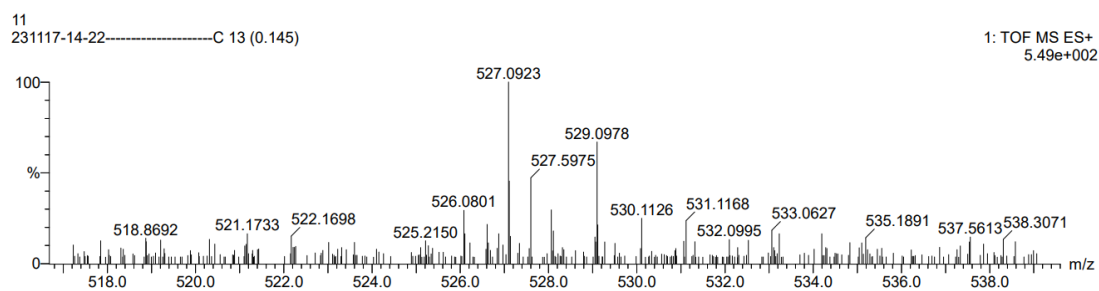

**Figure S116.** The HRESIMS of compound **1v**

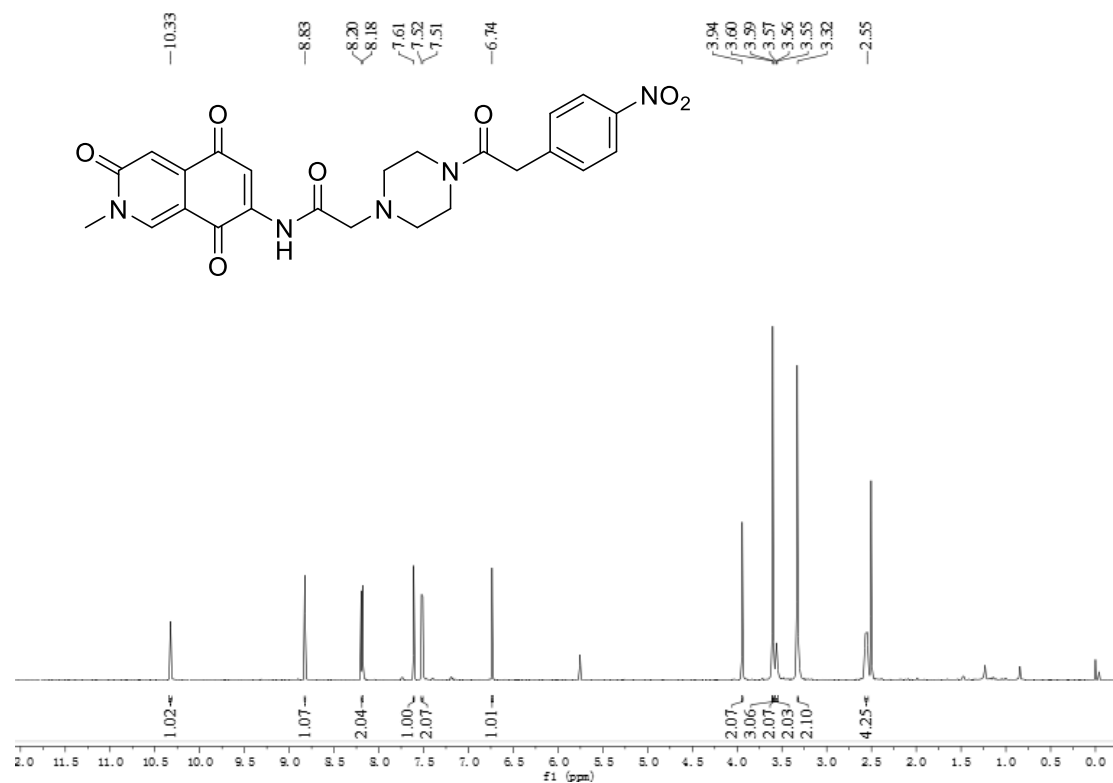

**Figure S117.** The  $^1\text{H-NMR}$  (600MHz,  $\text{DMSO-}d_6$ ) spectrum of compound **1w**

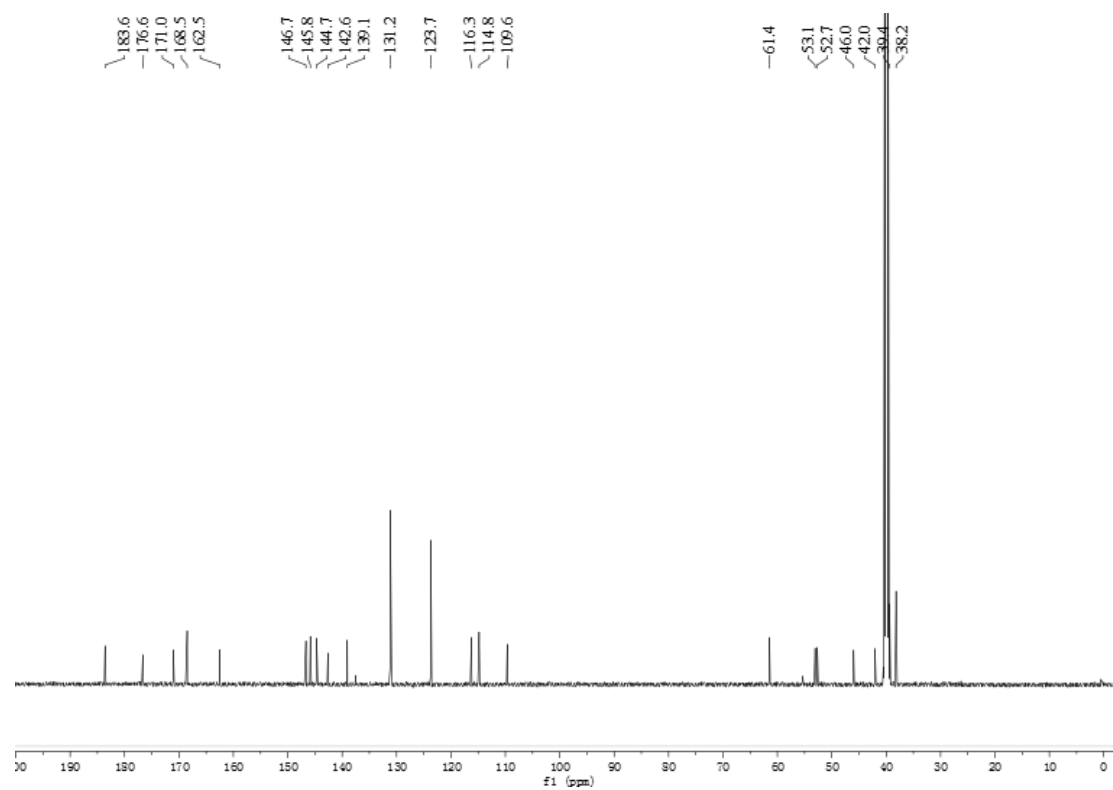

**Figure S118.** The  $^{13}\text{C-NMR}$  (150MHz,  $\text{DMSO-}d_6$ ) spectrum of compound **1w**

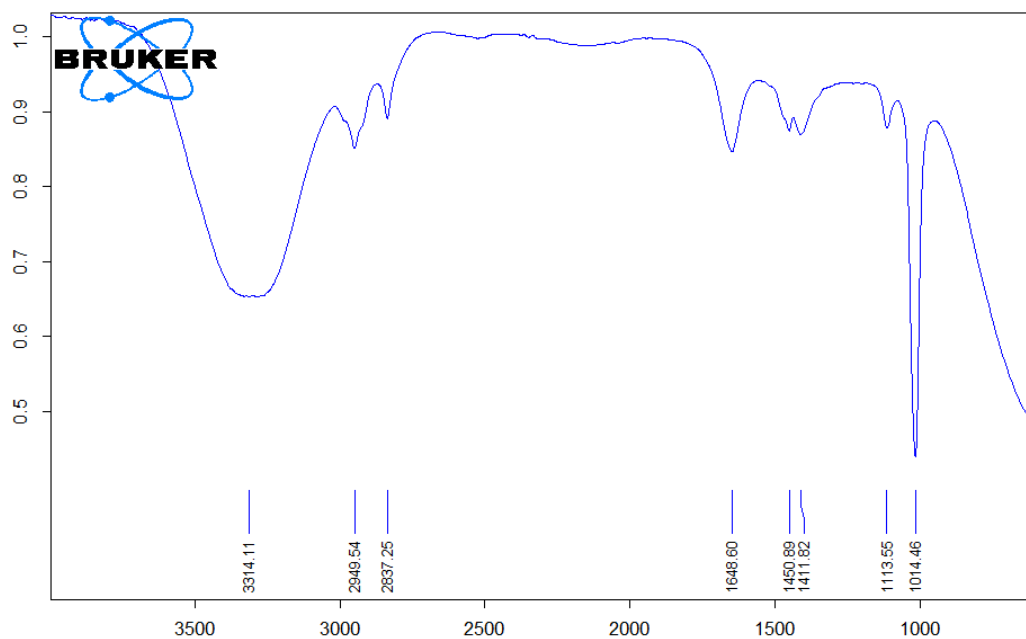

**Figure S119.** The IR spectrum of compound **1w**

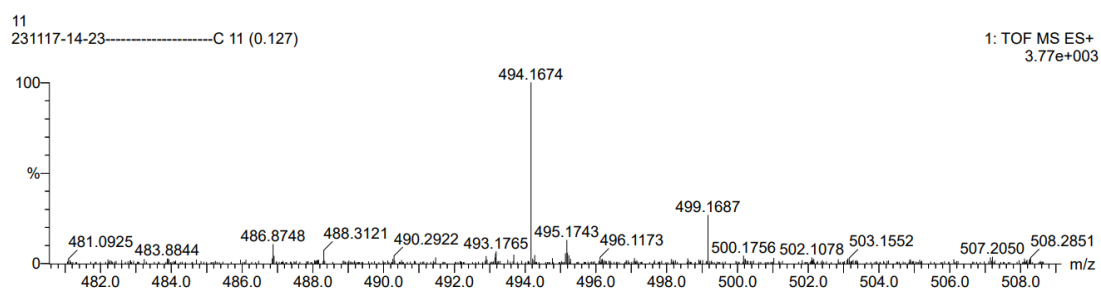

**Figure S120.** The HRESIMS of compound **1w**

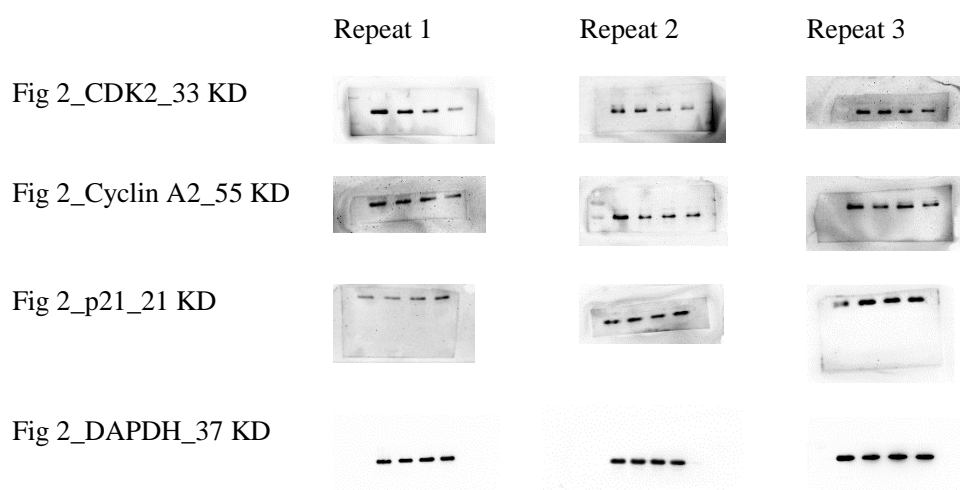

**Figure S121** Un-cropped images of the original Western blots for three repeats in **Figure 2**

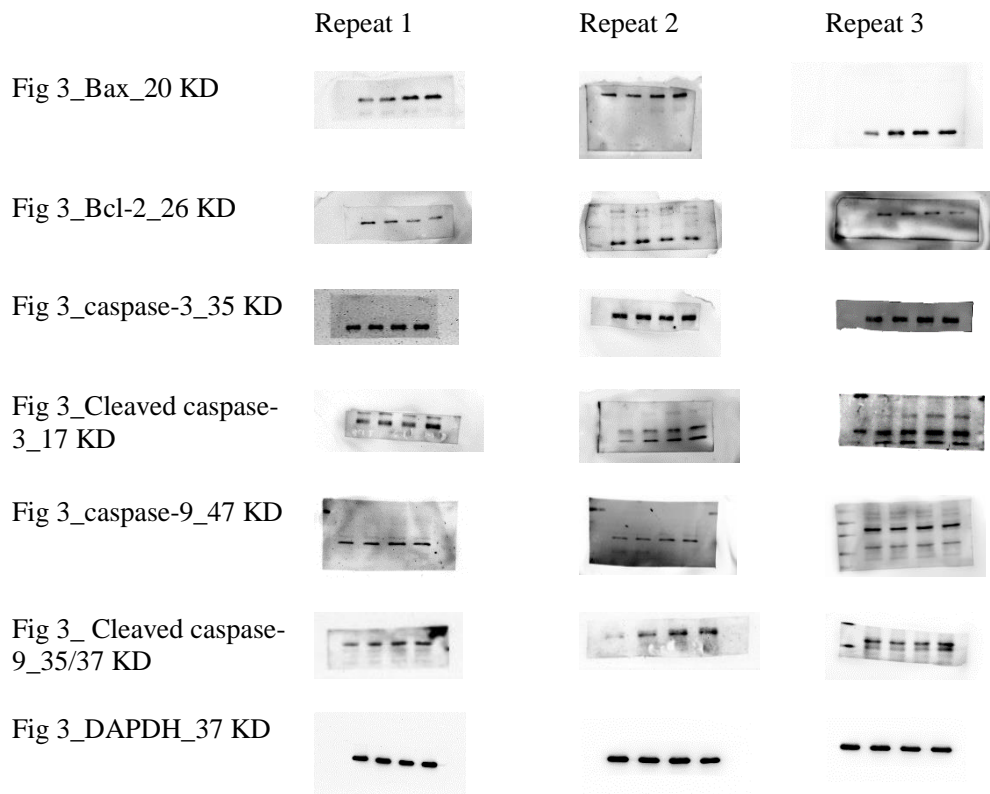

**Figure S122** Un-cropped images of the original Western blots for three repeats in **Figure 3**

**Table S1** List of primary antibodies

| primary antibodies | species | corporation                     |
|--------------------|---------|---------------------------------|
| GAPDH              | Rabbit  | Cell Signaling Technology (USA) |
| p21                | Rabbit  | Cell Signaling Technology (USA) |
| CDK2               | Rabbit  | Cell Signaling Technology (USA) |
| Cyclin A2          | Rabbit  | Cell Signaling Technology (USA) |
| Caspase-3          | Rabbit  | Cell Signaling Technology (USA) |
| Caspase-9          | Mouse   | Cell Signaling Technology (USA) |
| Bcl-2              | Rabbit  | Cell Signaling Technology (USA) |
| Bax                | Rabbit  | Cell Signaling Technology (USA) |
